# Supplementary material for: Different clinical features according to the anastomotic leakage subtypes after rectal cancer surgeries: contained vs. free leakages
Source: PLoS One. 2018 Dec 12;13(12):e0208572. doi: 10.1371/journal.pone.0208572 (PMC6291156; doi:10.1371/journal.pone.0208572)
Supplement: S1 Data — (XLSX) [file pone.0208572.s001.xlsx]

## Sheet: Sheet1
sorting	Jan_2005	smoking	age	sex_coding	weight	height	BMI	DM	Abd_opHx	ASA	AV	hospiral_day	Op_Name_Simp	op_method	ileostomy	combine_op	Op_time	Bloodloss	converion	preopCRT	TNMstage	pN	LN_Posi	Histo	AL_GradeABC	AL_graph	AL_duration	Early_delay_AL	AL_developPOD	AL_subtype	T_stage
0	1	99	62	1	80	169	28.01	99	99	2	2	20	1	11	1	99	300	0	99	99	4	N2	18	MD						0	3
0	1	99	69	2	52	150	22.81	1	1	2	2	12	1	11	99	99	155	0	99	99	1	N0	0	MD						0	1
0	1	99	66	1	76.5	164	28.44	99	99	2	2	20	1	11	99	99	190	500	99	99	2	N0	0	MD						0	3
0	1	99	69	2	64	155	26.64	1	99	2	11	8	1	11	99	1	215	0	99	99	1	N0	0	WD						0	1
0	1	99	46	2	57.5	162	21.91	99	99	11	11	17	1	11	99	1	150	0	99	99	3	N1	1	WD						0	2
0	1	1	46	1	76	170	26.3	99	99	2	2	18	1	11	1	99	340	0	99	1	2	N0	0	WD						0	3
0	1	99	57	1	68	169	23.81	99	99	11	2	10	1	11	99	1	170	0	99	99	1	N0	0	MD						0	2
0	1	99	66	1	60	176	19.37	99	99	11	11	13	1	11	99	99	145	200	99	99	2	N0	0	WD						0	3
0	1	99	48	2	58	158	23.23	99	1	11	2	18	1	11	99	99	120	0	99	99	2	N0	0	WD						0	3
0	1	1	61	1	81.5	167	29.22	99	99	2	11	26	1	11	99	99	195	150	99	99	2	N0	0	MD						0	3
0	1	99	78	1	75	167	26.89	99	99	2	11	13	1	11	99	99	190	0	99	99	3	N1	2	MD						0	3
0	1	99	32	1	70	178	22.09	99	99	11	2	16	1	11	99	99	185	500	99	99	3	N2	4	Mucinous						0	3
0	1	99	76	2	69	154	29.09	99	99	2	2	13	1	11	99	99	160	500	99	99	1	N0	0	MD						0	2
0	1	1	70	1	70.6	169	24.72	99	99	11	11	15	1	11	99	99	185	500	99	99	2	N0	0	MD						0	3
0	1	99	71	1	75	170	25.95	99	99	2	11	10	1	11	99	99	210	0	99	99	1	N0	0	WD						0	1
0	1	99	67	2	66	153	28.19	99	99	2	2	20	1	11	1	99	210	0	99	99	3	N1	1	MD						0	3
0	1	99	60	2	52	157	21.1	99	99	11	11	17	1	11	99	99	135	0	99	99	2	N0	0	MD						0	3
0	1	99	38	1	74.8	167	26.82	1	1	2	2	12	1	11	99	99	200	500	99	99	1	N0	0	MD						0	2
0	1	99	57	1	83	170	28.72	99	99	2	2	18	1	11	1	99	200	0	99	99	3	N1	3	WD						0	3
0	1	99	43	1	65	167	23.31	99	99	2	3	15	1	2	99	99	315	0	99	99	3	N1	1	MD						0	2
0	1	99	68	1	58	172	19.61	99	99	11	11	14	1	11	99	99	175	500	99	99	4	N0	0	MD						0	3
0	1	99	55	1	65	171	22.23	99	99	2	2	19	1	11	1	99	150	0	99	99	3	N1	3	MD						0	3
0	1	1	71	1	57	169	19.96	99	99	11	11	46	1	11	1	99	165	500	99	99	3	N1	3	MD	A	1	7	1	2005-03-14	2	3
0	1	99	60	2	58	162	22.1	99	1	11	2	24	1	11	99	99	285	500	99	99	3	N1	2	MD						0	2
0	1	99	55	1	65	170	22.49	99	99	11	11	6	1	11	99	99	150	0	99	99	2	N0	0	MD						0	3
0	1	99	60	1	67	165	24.61	99	99	11	2	9	1	11	99	99	265	600	99	99	2	N0	0	MD						0	3
0	1	99	56	1	76	167	27.25	99	99	3	2	7	1	11	99	99	210	0	99	99	2	N0	0	MD						0	3
0	1	99	75	1	50	162	19.05	99	99	11	2	10	1	11	99	99	185	500	99	99	4	N2	17	MD						0	3
0	1	99	49	1	55	170	19.03	99	99	11	2	19	1	11	99	99	300	500	99	99	3	N1	2	MD						0	3
0	1	99	72	1	65	165	23.88	99	99	11	11	19	1	11	99	99	120	500	99	99	3	N1	1	MD						0	3
0	1	99	73	1	71	169	24.86	99	99	2	11	14	1	11	99	99	180	100	99	99	4	N2	8	MD						0	3
0	1	99	44	2	60	165	22.04	99	99	11	3	9	1	11	1	99	225	300	99	99	2	N0	0	MD						0	3
0	1	99	33	2	52	163	19.57	99	99	11	11	15	1	11	99	1	255	500	99	99	4	N2	8	Mucinous						0	3
0	1	1	61	1	66	166	23.95	99	99	2	2	5	1	2	99	99	98	100	99	99	3	N1	3	PD						0	3
0	1	99	59	2	62	159	24.52	99	99	11	11	23	1	11	1	99	110	500	99	99	1	N0	0	MD						0	2
0	1	99	60	1	63	158	24.92	99	99	2	11	19	1	11	1	99	190	500	99	99	3	N1	3	MD						0	3
0	1	99	79	2	51	151	22.37	99	99	2	2	21	1	11	99	99	140	500	99	99	3	N1	1	MD	C	8	55	2	2005-05-31	2	3
0	1	99	73	2	44	146	20.64	99	1	2	2	20	1	11	99	99	185	500	99	99	2	N0	0	MD						0	3
0	1	99	48	1	77	176	24.86	99	99	11	11	11	1	11	99	99	155	0	99	99	2	N0	0	WD						0	3
0	1	99	57	1	63.5	163	23.9	99	99	11	2	15	1	11	99	1	245	0	99	99	1	N0	0	MD						0	2
0	1	99	66	1	64	161	24.69	99	99	11	2	11	1	11	99	99	155	200	99	99	1	N0	0	MD						0	2
0	1	1	60	1	79	174	26.09	99	99	2	2	10	1	11	99	99	240	300	99	99	1	N0	0	MD						0	1
0	1	1	69	1	52	173	17.37	99	99	11	2	15	1	11	99	99	150	0	99	99	1	N0	0	MD						0	2
0	1	99	67	2	73	163	27.48	99	99	2	11	15	1	11	99	99	155	0	99	99	2	N0	0	MD						0	3
0	1	99	64	1	57	160	22.27	99	99	11	3	8	1	11	99	99	190	500	99	99	2	N0	0	Mucinous						0	3
0	1	99	44	2	62.5	165	22.96	99	99	11	11	12	1	11	99	99	220	100	99	99	4	N2	15	MD						0	3
0	1	99	70	2	47	155	19.56	99	99	11	11	10	1	11	99	99	155	500	99	99	1	N0	0	MD						0	1
0	1	99	46	2	63	156	25.89	99	99	2	2	18	1	11	99	99	155	500	99	99	2	N0	0	Mucinous						0	3
0	1	99	70	2	45	145	21.4	99	99	11	3	12	1	11	1	99	180	0	99	99	1	N0	0	MD						0	2
0	1	99	64	1	66	170	22.84	99	99	11	2	14	1	11	99	99	300	200	99	99	4	N2	4	MD						0	3
0	1	99	75	2	38	153	16.23	99	99	11	11	7	1	2	99	99	215	0	99	99	1	N0	0	MD						0	2
0	1	1	50	1	78	171	26.67	99	99	2	2	16	1	11	99	99	255	500	99	99	2	N0	0	WD						0	3
0	1	99	38	2	62	160	24.22	99	99	11	2	9	1	2	99	99	225	500	99	99	3	N1	1	WD						0	2
0	1	99	51	1	70	170	24.22	99	99	11	11	20	1	11	99	99	375	0	99	99	4	N0	0	MD						0	3
0	1	99	60	2	59	160	23.05	99	99	11	2	9	1	2	99	99	230	0	99	99	1	N0	0	MD						0	1
0	1	99	71	1	61	176	19.69	99	99	11	11	16	1	11	99	99	135	0	99	99	2	N0	0	MD						0	3
0	1	99	67	1	60	164	22.31	99	99	11	11	22	1	11	1	99	230	100	99	99	2	N0	0	MD						0	3
0	1	1	59	1	52	175	16.98	99	99	11	2	48	1	11	99	99	180	0	99	99	2	N0	0	MD	C	1	5	1	2005-05-14	1	3
0	1	99	63	1	60	160	23.44	99	99	11	11	18	1	11	99	99	165	200	99	99	3	N1	2	MD						0	3
0	1	99	59	1	66.2	178	20.89	99	99	2	11	18	1	11	99	99	165	0	99	99	3	N1	3	MD						0	3
0	1	99	58	2	54	162	20.58	99	99	2	2	27	1	11	99	1	195	120	99	99	4	N2	6	MD	C	3	17	1	2005-07-04	2	3
0	1	99	58	2	60	146	28.15	99	99	2	11	9	1	2	99	99	330	0	99	99	3	N1	2	MD						0	2
0	1	99	37	2	41.7	157	16.92	99	99	11	2	18	1	11	99	99	120	0	99	99	2	N0	0	MD						0	3
0	1	99	46	1	71.4	171	24.42	99	99	11	11	30	1	11	1	99	350	800	99	99	3	N2	4	MD						0	3
0	1	99	67	1	60	167	21.51	1	99	2	11	15	1	11	99	99	150	0	99	99	2	N0	0	MD						0	3
0	1	99	59	2	60	160	23.44	99	99	2	2	32	1	11	99	99	190	500	99	99	3	N1	1	MD						0	3
0	1	99	70	2	57	149	25.67	1	99	2	11	13	1	11	99	99	180	500	99	99	1	No	0	WD						0	1
0	1	99	37	2	41	150	18.22	99	1	11	2	11	1	11	99	99	225	200	99	99	4	N2	6	Mucinous						0	3
0	1	99	57	2	78	159	30.85	99	99	2	11	21	1	11	99	99	175	0	99	99	3	N2	4	MD						0	3
0	1	1	61	1	54	161	20.83	99	99	11	2	12	1	11	99	99	135	500	99	99	3	N2	4	MD						0	3
0	1	99	59	1	54	164	20.08	99	99	11	2	58	1	11	99	99	190	500	99	1	3	N1	1	MD	C	3	20	1	2005-07-13	2	2
0	1	99	64	1	59	173	19.71	99	99	11	11	12	1	11	99	99	110	0	99	99	1	N0	0	WD						0	2
0	1	99	59	2	58	158	23.23	1	99	2	11	21	1	11	99	99	125	100	99	99	3	N1	1	MD						0	2
0	1	99	63	2	80	160	31.25	99	99	2	2	22	1	11	99	1	525	400	99	99	4	N1	1	MD						0	3
0	1	99	40	1	63	166	22.86	99	99	2	2	15	1	11	99	99	185	0	99	99	3	N1	1	MD						0	3
0	1	99	65	1	83	168	29.41	99	99	2	11	38	1	11	99	1	270	300	99	99	3	N2	7	MD						0	3
0	1	99	41	1	86	173	28.73	99	99	2	11	15	1	11	99	99	210	300	99	99	1	N0	0	MD						0	2
0	1	99	70	1	64	160	24.69	99	1	2	2	22	1	11	99	99	150	0	99	99	3	N2	7	MD						0	3
0	1	99	60	1	73	175	23.84	99	99	2	11	9	1	11	99	99	125	0	99	99	1	N0	0	MD						0	2
0	1	99	53	2	65	155	27.06	99	99	2	2	21	1	11	99	1	145	0	99	99	3	N1	2	MD						0	3
0	1	99	50	2	45.8	152	19.57	99	99	11	2	14	1	11	1	99	160	0	99	99	2	N0	0	WD						0	3
0	1	1	69	1	64	168	22.68	99	99	11	11	13	1	11	1	1	195	0	99	99	2	N0	0	MD						0	3
0	1	99	50	1	69	170	23.88	99	99	11	11	11	1	11	1	99	210	600	99	99	1	N0	0	MD						0	2
0	1	99	67	1	65.1	169	22.79	1	99	2	11	10	1	11	99	99	235	100	99	99	4	N2	4	MD						0	3
0	1	1	73	1	73	167	26.18	1	99	2	3	18	1	11	1	99	185	0	99	99	3	N2	4	MD						0	1
0	1	99	70	1	63	163	23.71	1	99	2	2	13	1	11	1	99	185	100	99	99	3	N1	2	MD						0	3
0	1	99	55	1	50	162	19.05	1	99	2	11	19	1	11	99	99	175	500	99	99	2	N0	0	MD						0	3
0	1	1	64	1	60	163	22.58	99	99	2	11	25	1	11	99	99	190	600	99	99	3	N1	2	MD						0	3
0	1	99	77	1	49	153	20.93	99	99	2	11	16	1	11	99	99	165	0	99	99	3	N2	6	PD						0	3
0	1	99	67	2	60	153	25.63	99	99	2	3	10	1	11	1	99	211	0	99	1	1	N0	0	WD						0	2
0	1	99	67	1	63	158	25.24	99	1	3	2	15	1	11	99	1	320	700	99	99	4	N2	51	MD						0	3
0	1	99	64	1	60	168	21.26	99	99	2	2	10	1	11	1	99	310	1000	99	99	1	N0	0	MD						0	1
0	1	1	48	1	70	164	26.03	99	99	2	2	20	1	11	1	99	190	0	99	99	3	N1	1	MD						0	3
0	1	99	51	1	57	162	21.72	1	99	2	2	12	1	11	99	99	185	0	99	99	2	N0	0	MD						0	3
0	1	99	64	1	70	175	22.86	99	99	11	2	9	1	11	99	99	150	0	99	99	1	N0	0	WD						0	1
0	1	99	39	2	65.4	167	23.45	99	99	11	2	16	1	11	99	99	185	500	99	99	2	N0	0	MD						0	3
0	1	99	83	2	70.7	146	33.17	99	99	2	2	18	1	11	1	99	230	500	99	99	3	N1	2	Mucinous						0	3
0	1	99	71	1	74.5	174	24.61	99	99	11	2	18	1	11	1	99	230	0	99	99	3	N1	1	MD						0	3
0	1	99	56	2	58	164	21.56	99	99	11	11	9	1	2	99	99	270	0	99	99	1	N0	0	MD						0	1
0	1	99	61	2	48	160	18.75	99	99	11	11	12	1	11	99	99	120	500	99	99	1	N0	0	MD						0	2
0	1	1	67	1	78	170	26.99	99	99	2	2	12	1	11	1	99	210	0	99	99	1	N0	0	MD						0	2
0	1	1	71	1	74	176	23.89	1	99	2	2	20	1	11	99	99	165	300	99	99	2	N0	0	MD						0	3
0	1	99	62	1	54.1	162	20.61	99	99	11	2	18	1	11	1	99	190	0	99	99	3	N1	2	PD						0	3
0	1	99	79	1	73.8	164	27.44	99	99	3	2	15	1	11	99	99	140	400	99	99	3	N1	3	MD						0	3
0	1	99	66	1	55	169	19.26	99	99	2	2	11	1	11	99	99	195	0	99	99	1	N0	0	WD						0	1
0	1	99	72	2	51	149	22.97	99	99	3	11	14	1	11	99	99	130	0	99	99	2	N0	0	MD						0	3
0	1	99	49	2	48.5	157	19.68	99	99	11	11	9	1	11	99	1	135	0	99	99	3	N1	2	MD						0	2
0	1	99	56	1	69	170	23.88	99	99	11	11	35	1	11	99	99	120	500	99	99	3	N2	7	MD						0	3
0	1	99	70	1	63.8	164	23.72	99	99	2	11	7	1	11	99	99	125	500	99	99	1	N0	0	MD						0	2
0	1	1	55	1	68	168	24.09	99	99	11	11	9	1	2	99	99	125	100	99	99	1	N0	0	WD						0	1
0	1	1	61	1	51	177	16.28	99	99	11	2	9	1	11	99	99	135	0	99	99	2	N0	0	MD						0	3
0	1	1	45	1	65	159	25.71	99	99	2	2	18	1	11	99	99	190	0	99	99	3	N2	9	MD						0	3
0	1	99	46	2	60.9	162	23.21	99	99	11	11	15	1	11	1	99	140	0	99	99	2	N0	0	MD						0	3
0	1	99	59	1	75	179	23.41	99	99	11	2	13	1	11	99	1	285	200	99	99	1	N0	0	MD						0	2
0	1	99	55	2	54.5	153	23.28	99	99	2	2	19	1	11	99	1	340	500	99	99	3	N1	1	MD						0	3
0	1	99	54	1	65.5	169	22.93	99	99	11	2	15	1	11	99	99	200	0	99	99	2	N0	0	MD						0	3
0	1	99	53	1	60	164	22.31	99	99	11	11	18	1	11	99	99	110	0	99	99	3	N1	1	MD						0	3
0	1	99	62	1	74	164	27.51	99	99	2	11	11	1	11	99	99	185	200	99	99	2	N0	0	MD						0	3
0	1	99	64	1	73	168	25.86	99	99	2	2	14	1	11	99	99	270	0	99	99	3	N2	4	MD						0	3
0	1	99	68	2	56	158	22.43	1	99	2	11	13	1	2	99	99	165	0	99	99	3	N1	1	WD						0	2
0	1	1	54	1	85	180	26.23	99	99	2	2	15	1	2	99	99	295	0	99	99	2	N0	0	MD						0	3
0	1	99	56	1	57	164	21.19	1	99	2	2	58	1	11	99	1	345	0	99	1	0	N0	0	WD						0	0
0	1	1	59	1	65.5	169	22.93	1	99	2	2	11	1	11	99	99	124	0	99	99	2	N0	0	MD						0	3
0	1	99	72	1	60	175	19.59	99	99	11	11	7	1	11	99	99	205	0	99	99	3	N1	1	WD						0	2
0	1	99	27	2	53	160	20.7	99	99	11	2	12	1	11	99	99	195	0	99	99	2	N0	0	MD						0	3
0	1	99	61	1	80	170	27.68	99	99	2	11	14	1	11	99	1	330	0	99	99	3	N1	1	WD						0	3
0	1	1	72	1	57.4	169	20.1	99	99	11	2	13	1	11	1	99	495	1700	99	1	4	N0	0	MD						0	3
0	1	99	66	1	59	162	22.48	99	99	2	2	12	1	11	99	99	160	0	99	99	2	N0	0	MD						0	3
0	1	99	49	2	56	163	21.08	99	99	11	3	12	1	11	99	99	120	0	99	99	1	N0	0	MD						0	2
0	1	99	69	1	75	172	25.35	99	99	2	2	11	1	11	1	99	420	300	99	99	2	N0	0	MD						0	3
0	1	1	48	1	80	171	27.36	1	99	2	2	25	1	11	1	1	420	1600	99	99	4	N2	8	MD						0	3
0	1	99	79	2	48	146	22.52	99	99	2	11	13	1	11	99	99	100	0	99	99	2	N0	0	MD						0	3
0	1	99	75	1	48	173	16.04	99	99	2	2	20	1	11	99	99	165	0	99	99	3	N1	2	MD						0	3
0	1	99	70	1	69	173	23.05	99	99	3	2	19	1	11	99	99	180	600	99	99	3	N1	1	MD	A	4	25	1	2005-06-24	2	2
0	1	99	54	2	53	152	22.94	99	99	11	2	12	1	2	99	99	342	0	99	99	1	N0	0	MD						0	1
0	1	99	63	1	42.8	168	15.16	99	99	2	2	12	1	11	99	99	160	0	99	99	2	N0	0	MD						0	3
0	1	99	76	2	58.2	154	24.54	99	99	11	2	12	1	11	99	99	171	0	99	99	2	N0	0	MD						0	3
0	1	99	45	1	63.4	161	24.5	99	99	11	2	18	1	11	99	99	161	250	99	99	2	N0	0	WD						0	3
0	1	99	50	1	75.4	170	26.09	99	99	2	2	12	1	11	99	99	125	350	99	99	3	N1	2	MD						0	3
0	1	99	48	2	47	165	17.26	99	99	11	11	7	1	11	99	99	190	0	99	99	3	N1	1	MD						0	2
0	1	1	44	1	64	176	20.66	99	99	2	2	21	1	11	99	99	315	100	99	99	3	N2	39	MD						0	3
0	1	99	63	2	42.9	162	16.35	99	99	11	3	7	1	11	99	99	125	500	99	99	2	N0	0	MD						0	3
0	1	99	68	2	58	164	21.56	1	99	2	2	11	1	11	99	99	154	0	99	99	1	N0	0	WD						0	2
0	1	99	79	1	63	158	25.24	1	99	2	2	12	1	11	99	99	150	0	99	99	2	N0	0	MD						0	3
0	1	99	54	1	65	156	26.71	99	99	2	11	12	1	11	99	99	116	0	99	99	1	N0	0	MD						0	2
0	1	99	70	1	60	168	21.26	99	99	11	11	12	1	11	99	99	203	0	99	99	2	N0	0	MD						0	3
0	1	99	77	1	51.4	169	18.03	99	99	11	2	11	1	11	99	99	109	500	99	99	1	N0	0	MD						0	1
0	1	99	68	1	73	170	25.26	99	99	2	2	15	1	11	99	99	184	200	99	99	3	N1	3	MD						0	3
0	1	1	63	1	61.5	161	23.73	99	99	11	2	12	1	11	99	99	209	500	99	99	2	N0	0	MD						0	3
0	1	99	55	2	80	152	34.63	99	99	2	2	13	1	11	99	99	195	500	99	99	3	N1	1	MD						0	3
0	1	99	47	1	66	174	21.8	99	99	11	11	10	1	11	99	99	189	500	99	99	3	N1	3	MD						0	3
0	1	99	59	2	56.4	159	22.31	99	99	2	2	19	1	11	99	99	193	0	99	99	3	N1	2	MD						0	3
0	1	99	65	2	56.9	148	25.98	99	99	2	3	26	1	11	1	99	270	600	99	99	2	N0	0	MD						0	3
0	1	99	50	2	57	157	23.12	99	99	11	3	10	1	11	99	99	153	0	99	99	1	N0	0	MD						0	2
0	1	99	60	1	66.5	164	24.72	99	1	11	2	19	1	11	99	99	174	0	99	99	3	N2	4	MD						0	3
0	1	99	57	1	63.9	171	21.85	99	99	2	2	12	1	11	99	1	335	0	99	99	1	N0	0	MD						0	1
0	1	99	69	1	60	170	20.76	99	99	11	2	12	1	11	99	99	153	100	99	99	2	N0	0	MD						0	3
0	1	99	63	2	51.7	151	22.67	99	99	11	2	10	1	11	99	99	126	0	99	99	3	N2	4	MD						0	3
0	1	99	49	1	77	170	26.64	99	99	2	2	26	1	11	99	99	200	800	99	1	1	N0	0	WD						0	1
0	1	99	54	2	66	161	25.46	99	1	2	11	11	1	11	99	99	150	0	99	99	3	N1	3	MD						0	2
0	1	1	81	1	65.8	165	24.17	99	99	2	2	13	1	11	99	99	127	0	99	99	3	N2	10	MD						0	3
0	1	99	58	2	51	154	21.5	1	99	2	2	11	1	11	99	99	115	0	99	99	3	N1	2	MD						0	3
0	1	99	49	1	60	163	22.58	99	99	11	11	12	1	11	99	99	135	0	99	99	2	N0	0	MD						0	3
0	1	99	65	2	38	150	16.89	99	99	11	2	14	1	11	99	99	131	0	99	99	1	N0	0	MD						0	1
0	1	99	71	1	48.9	158	19.34	99	1	2	11	12	1	11	99	99	162	0	99	99	3	N2	5	MD						0	3
0	1	99	30	2	49	157	19.88	99	99	11	2	12	1	11	99	99	139	0	99	99	3	N1	3	MD						0	3
0	1	99	59	1	60	172	20.28	99	99	11	3	17	1	11	99	99	193	500	99	99	3	N1	2	MD						0	3
0	1	99	65	1	52.5	163	19.76	99	99	11	11	9	1	11	99	99	117	0	99	99	1	N0	0	MD						0	2
0	1	99	75	2	55	146	25.8	99	99	2	2	10	1	11	99	99	100	0	99	99	3	N1	2	MD						0	3
0	1	99	81	1	72	173	24.06	99	99	2	3	13	1	11	99	99	175	300	99	99	1	N0	0	MD						0	1
0	1	99	73	1	64	168	22.68	99	99	11	2	19	1	11	1	99	196	0	99	99	2	N0	0	MD						0	3
0	1	1	25	1	87	171	29.75	99	99	2	11	18	1	11	1	99	400	1500	99	99	2	N0	0	MD						0	3
0	1	99	58	1	77.5	175	25.31	99	99	2	2	20	1	11	99	99	150	500	99	99	3	N2	5	MD						0	3
0	1	99	61	2	63	150	28	1	99	2	2	13	1	11	99	99	150	0	99	99	3	N1	1	MD						0	1
0	1	99	70	2	51.2	146	24.02	99	99	11	2	24	1	11	99	99	117	200	99	99	3	N1	3	MD						0	3
0	1	99	53	1	75	168	26.57	99	99	2	11	11	1	11	99	99	178	0	99	99	3	N1	1	MD						0	3
0	1	99	57	1	73	169	25.56	99	99	2	2	11	1	11	99	99	115	0	99	99	3	N1	2	MD						0	3
0	1	99	45	1	65	170	22.49	99	99	11	2	10	1	11	99	99	154	0	99	99	3	N1	2	MD						0	3
0	1	99	55	2	60.4	158	24.23	99	99	11	11	18	1	11	99	99	163	0	99	99	4	N2	34	PD						0	3
0	1	99	76	1	61	168	21.61	1	99	2	2	27	1	11	99	99	180	0	99	99	2	N0	0	MD						0	3
0	1	99	74	1	55.1	166	20	1	99	2	2	13	1	11	99	99	185	100	99	99	1	N0	0	MD						0	2
0	1	99	57	1	65	171	22.23	99	99	11	11	24	1	11	99	1	375	560	99	99	4	N2	10	MD						0	4
0	1	99	48	2	67.5	163	25.41	99	99	2	2	13	1	11	99	99	221	0	99	99	1	N0	0	MD						0	2
0	1	99	72	2	52.5	138	27.57	99	1	2	2	11	1	11	99	99	114	500	99	99	3	N2	9	MD						0	3
0	1	99	48	2	66	155	27.47	99	99	2	2	11	1	11	1	1	229	250	99	1	4	N2	8	MD						0	3
0	1	99	55	2	52	158	20.83	99	99	11	3	11	1	11	1	99	156	0	99	99	3	N2	9	MD						0	3
0	1	99	40	1	66.2	173	22.12	99	99	11	2	18	1	11	99	99	151	200	99	99	1	N0	0	MD						0	2
0	1	99	63	1	53	165	19.47	99	99	11	2	10	1	11	99	99	128	0	99	99	1	N0	0	MD						0	2
0	1	99	64	2	65	157	26.37	99	99	2	2	16	1	11	1	99	249	0	99	99	3	N1	3	MD						0	3
0	1	1	68	2	63.6	161	24.54	99	99	11	2	13	1	11	1	99	187	0	99	99	3	N1	1	MD						0	3
0	1	1	76	1	70	168	24.8	99	99	11	2	11	1	11	1	99	222	0	99	99	2	N0	0	MD						0	3
0	1	99	56	2	60	155	24.97	99	99	11	3	14	1	11	99	1	225	0	99	99	2	N0	0	MD						0	3
0	1	99	43	1	62	180	19.14	99	99	11	2	15	1	11	1	99	255	3000	99	99	4	N2	17	MD						0	3
0	1	99	58	2	76	162	28.96	99	99	2	2	11	1	11	99	99	235	500	99	1	0	N0	0	WD						0	0
0	1	99	52	2	60	163	22.58	99	99	11	2	17	1	11	99	99	165	150	99	99	3	N2	6	MD						0	3
0	1	99	49	2	61.2	158	24.56	99	99	11	2	11	1	11	99	99	157	100	99	99	3	N2	18	PD						0	3
0	1	99	66	1	72	167	25.82	99	99	2	2	14	1	11	99	99	175	0	99	99	1	N0	0	MD						0	1
0	1	99	62	1	58	167	20.8	1	1	2	11	12	1	11	99	1	299	900	99	99	1	N0	0	MD						0	2
0	1	99	57	1	52	167	18.65	99	99	11	2	13	1	11	99	99	140	150	99	99	1	N0	0	MD						0	2
0	1	99	55	1	81	177	25.85	99	99	2	2	14	1	11	99	99	175	0	99	99	3	N1	2	MD						0	4
0	1	99	55	1	70	174	23.12	99	99	11	2	16	1	11	99	99	165	0	99	99	3	N2	21	Mucinous	C	1	3	1	2006-04-02	1	4
0	1	99	62	1	75	172	25.35	1	99	2	11	16	1	11	1	99	324	570	99	99	3	N2	8	MD						0	4
0	1	99	63	1	81	178	25.56	99	99	2	2	11	1	11	1	99	239	0	99	99	2	N0	0	MD						0	3
0	1	99	64	2	58.5	159	23.14	99	1	11	11	16	1	11	99	1	381	600	99	99	4	N2	9	MD						0	3
0	1	99	71	1	65	170	22.49	99	99	2	2	17	1	11	99	99	138	130	99	99	3	N1	1	MD						0	4
0	1	1	57	1	70	161	27.01	99	99	2	2	17	1	11	99	99	206	500	99	99	3	N1	1	MD						0	3
0	1	1	48	1	71	165	26.08	99	99	2	2	23	1	11	1	1	300	300	99	99	4	N0	0	MD						0	3
0	1	99	62	1	64	164	23.8	99	1	11	11	9	1	2	99	99	320	0	99	99	3	N1	3	MD						0	3
0	1	99	62	1	56.2	155	23.39	1	1	2	11	17	1	11	99	99	193	0	99	99	2	N0	0	WD						0	3
0	1	99	61	2	72	168	25.51	99	1	2	11	16	1	11	99	99	220	0	99	99	3	N1	1	MD						0	3
0	1	99	49	2	59	163	22.21	99	99	11	2	9	1	2	99	99	401	0	99	99	1	N0	0	WD						0	1
0	1	99	62	1	51	164	18.96	99	99	11	2	37	1	2	1	99	341	0	1	99	1	N0	0	WD						0	1
0	1	1	63	1	56.3	173	18.81	99	99	11	2	14	1	11	99	99	150	500	99	99	2	N0	0	MD						0	3
0	1	99	70	2	64	160	25	99	99	11	11	14	1	11	99	99	175	500	99	99	2	N0	0	MD						0	3
0	1	99	66	2	65.3	151	28.64	99	99	2	2	15	1	11	99	99	248	260	99	99	1	N0	0	WD						0	2
0	1	99	54	1	68	168	24.09	99	99	11	11	7	1	2	99	99	240	0	99	99	3	N2	7	MD						0	3
0	1	99	38	2	60	166	21.77	99	99	11	2	16	1	11	99	99	186	100	99	99	3	N1	1	MD						0	1
0	1	99	64	1	73.5	169	25.73	99	99	2	2	10	1	11	99	99	313	100	1	99	2	N0	0	WD						0	3
0	1	99	62	1	62	159	24.52	1	99	2	11	19	1	11	99	99	175	0	99	99	3	N1	2	WD						0	3
0	1	99	63	1	75	178	23.67	99	99	2	2	31	1	11	99	99	195	150	99	99	3	N2	6	MD						0	4
0	1	99	58	1	58	174	19.16	99	99	11	2	11	1	11	99	99	157	100	99	99	1	N0	0	MD						0	2
0	1	99	39	2	67	160	26.17	99	99	2	11	14	1	11	99	99	175	0	99	99	2	N0	0	MD						0	3
0	1	99	66	1	58.4	166	20.94	99	99	11	11	22	1	11	99	99	232	0	99	99	4	N0	0	MD						0	3
0	1	1	59	1	65	162	24.77	99	99	2	2	11	1	11	99	99	198	0	99	99	2	N0	0	MD						0	3
0	1	99	49	1	55	164	20.45	99	99	11	11	13	1	11	99	1	285	100	99	99	4	N1	3	MD						0	3
0	1	1	53	1	53	169	18.56	99	99	11	11	12	1	11	99	99	205	0	99	99	2	N0	0	MD						0	3
0	1	99	64	2	48.4	146	22.75	99	1	2	2	12	1	11	99	99	154	0	99	99	3	N1	1	MD						0	3
0	1	99	73	1	68.5	164	25.47	99	99	2	2	12	1	11	99	99	240	0	99	99	1	N0	0	WD						0	1
0	1	99	75	1	63	163	23.71	99	99	11	2	16	1	11	99	1	233	150	99	99	2	N0	0	MD						0	3
0	1	1	51	1	67	162	25.53	99	99	2	2	15	1	11	99	1	307	310	99	99	4	N2	11	MD						0	3
0	1	99	28	2	41	158	16.42	99	99	11	2	10	1	11	99	1	173	0	99	1	2	N0	0	MD						0	3
0	1	1	46	1	95	177	30.32	99	99	2	11	9	1	11	99	99	163	200	99	99	1	N0	0	MD						0	2
0	1	1	85	1	49.9	156	20.5	99	99	2	11	9	1	11	99	99	100	100	99	99	2	N0	0	MD						0	3
0	1	99	68	1	63	165	23.14	99	99	11	11	12	1	11	99	99	177	50	99	99	2	N0	0	MD						0	4
0	1	1	54	1	65	164	24.17	1	99	2	11	9	1	11	99	99	164	0	99	99	3	N2	4	MD						0	3
0	1	99	59	2	56.8	154	23.95	99	99	2	11	10	1	3	99	99	333	0	99	99	1	N0	0	MD						0	1
0	1	99	69	1	67.1	167	24.06	1	99	2	11	14	1	11	99	99	266	500	99	99	3	N1	1	PD						0	3
0	1	99	53	2	60	158	24.03	99	99	11	11	12	1	2	99	99	223	0	99	99	1	N0	0	MD						0	1
0	1	99	40	2	50	158	20.03	99	99	11	11	20	1	2	99	99	222	200	99	99	3	N2	15	MD						0	4
0	1	99	62	1	55	161	21.22	99	99	11	2	20	1	11	99	99	326	700	99	99	4	N2	20	MD						0	4
0	1	1	71	1	47	161	18.13	99	99	11	2	12	1	11	99	99	130	0	99	99	3	N1	3	MD						0	3
0	1	99	65	2	57	165	20.94	99	99	2	2	10	1	11	99	99	170	0	99	99	2	N0	0	Mucinous						0	3
0	1	99	38	2	51	161	19.68	99	99	11	2	9	1	11	99	99	120	0	99	99	3	N1	3	MD						0	3
0	1	99	68	2	63	150	28	99	99	2	2	26	1	11	99	99	150	0	99	99	3	N2	4	MD	C	1	7	1	2006-07-25	1	3
0	1	99	45	2	57	161	21.99	99	99	11	2	15	1	11	1	99	210	70	99	99	3	N1	1	MD						0	3
0	1	99	65	2	53	155	22.06	99	99	11	11	10	1	11	99	99	100	0	99	99	3	N2	4	MD						0	3
0	1	99	58	2	53	149	23.87	99	99	11	2	27	1	11	99	99	132	600	99	99	3	N1	3	MD						0	3
0	1	99	60	1	67.4	165	24.76	99	99	2	11	9	1	2	99	99	271	30	99	99	2	N0	0	WD						0	3
0	1	99	79	1	50.3	155	20.94	99	99	11	2	13	1	2	99	99	358	100	99	99	3	N1	1	Mucinous						0	3
0	1	99	48	2	51	155	21.23	99	99	2	2	9	1	2	99	99	196	70	99	99	2	N0	0	MD						0	3
0	1	1	66	1	55.9	165	20.53	99	99	11	11	10	1	11	99	99	150	500	99	99	4	N0	0	MD						0	4
0	1	99	57	1	61.9	166	22.46	99	99	11	2	10	1	11	99	99	170	200	99	99	2	N0	0	MD						0	3
0	1	1	54	1	63.5	172	21.46	99	99	3	2	11	1	11	1	99	212	0	99	99	3	N2	31	Signet						0	3
0	1	99	36	1	74.7	179	23.31	99	99	11	2	13	1	11	99	99	125	0	99	99	2	N0	0	MD						0	3
0	1	99	74	2	68.8	158	27.56	1	99	2	2	19	1	11	1	99	185	100	99	99	3	N1	3	MD						0	3
0	1	99	67	1	79	166	28.67	1	99	2	11	12	1	2	99	99	250	700	1	99	1	N0	0	WD						0	1
0	1	1	48	1	65	173	21.72	99	99	11	2	12	1	2	99	99	320	1000	99	99	1	N0	0	WD						0	1
0	1	99	36	2	50	159	19.78	99	99	11	2	22	1	11	99	99	181	0	99	99	3	N1	2	MD	C	2	8	1	2006-09-02	1	1
0	1	99	70	2	81	158	32.45	99	99	2	11	10	1	11	99	99	150	200	99	99	2	N0	0	WD						0	3
0	1	1	63	1	57.6	166	20.9	99	99	11	11	10	1	11	99	1	264	0	99	99	3	N2	17	MD						0	4
0	1	99	61	2	56	150	24.89	99	99	11	2	16	1	11	99	99	176	600	99	99	1	N0	0	WD						0	1
0	1	99	51	2	59.6	158	23.87	99	1	11	2	27	1	11	99	99	157	300	99	99	4	N2	8	MD						0	3
0	1	99	57	2	56.6	149	25.49	99	99	2	11	11	1	2	99	99	158	0	99	99	2	N0	0	MD						0	3
0	1	99	69	1	55	166	19.96	1	99	2	2	15	1	2	99	99	321	0	99	99	2	N0	0	MD						0	3
0	1	1	61	1	58	161	22.38	1	99	2	11	15	1	11	99	99	235	0	99	99	3	N2	4	MD						0	3
0	1	1	59	1	77	164	28.28	99	99	2	2	10	1	2	99	99	317	500	1	99	1	N0	0	MD						0	1
0	1	1	52	1	68	170	23.53	1	99	2	3	18	1	11	99	99	136	600	99	99	1	N0	0	MD						0	2
0	1	99	45	2	55	158	22.03	99	99	11	2	12	1	11	99	99	135	0	99	99	3	N1	1	MD						0	3
0	1	99	57	2	45.8	152	19.82	99	99	11	2	14	1	11	99	1	272	500	99	1	2	N0	0	MD						0	3
0	1	1	59	1	59.5	167	21.33	99	99	11	2	17	1	11	99	99	178	400	99	99	3	N1	1	MD						0	3
0	1	99	61	2	48	156	19.72	99	99	2	11	12	1	11	99	99	125	70	99	99	3	N2	5	MD						0	3
0	1	1	65	1	66.8	170	23.11	99	99	11	11	14	1	11	1	99	175	0	99	99	3	N1	1	MD						0	3
0	1	1	73	1	65.3	167	23.41	99	99	2	2	12	1	11	1	1	330	100	99	99	4	N2	7	MD						0	4
0	1	1	73	1	54	160	21.09	99	99	11	2	12	1	11	1	99	239	300	99	1	2	N0	0	PD						0	3
0	1	99	64	1	68	168	24.09	99	99	2	2	10	1	11	99	99	190	600	99	99	2	N0	0	MD						0	3
0	1	99	52	2	46	152	19.91	1	99	2	2	18	1	11	99	1	210	1000	99	99	2	N0	0	MD						0	4
0	1	1	68	1	58.5	167	20.98	1	99	2	11	21	1	11	99	99	111	0	99	99	1	N0	0	MD						0	2
0	1	99	49	2	48	150	21.33	99	99	11	2	10	1	11	99	99	106	0	99	99	1	N0	0	PD						0	2
0	1	99	62	1	85	180	26.23	1	99	2	2	17	1	11	99	99	183	0	99	99	1	N0	0	MD						0	1
0	1	99	72	2	46.7	153	19.95	1	99	2	11	10	1	11	99	99	138	0	99	99	1	N0	0	MD						0	2
0	1	99	64	1	57	164	21.19	99	99	11	11	11	1	11	99	99	150	100	99	99	2	N0	0	WD						0	3
0	1	99	57	2	57	166	20.69	99	99	11	3	11	1	11	1	99	235	2000	99	99	3	N2	10	PD						0	3
0	1	99	55	2	54	157	21.91	99	99	11	3	10	1	2	1	99	162	0	99	99	3	N1	1	MD						0	3
0	1	99	62	2	43.7	145	20.78	99	99	2	11	66	1	11	99	1	366	200	99	1	4	N1	2	MD						0	3
0	1	99	71	1	75.9	177	24.23	99	99	11	2	16	1	2	99	99	327	0	99	99	3	N1	1	MD						0	3
0	1	1	50	1	84	176	27.12	99	99	2	2	12	1	11	99	1	320	500	99	99	4	N2	7	MD						0	3
0	1	99	70	1	60	170	20.76	1	99	2	11	13	1	2	99	99	267	0	99	99	2	N0	0	MD						0	3
0	1	1	59	1	74	177	23.62	99	99	2	11	8	1	2	99	99	109	0	99	99	2	N0	0	MD						0	3
0	1	99	58	2	59	166	21.41	99	99	2	2	9	1	2	99	99	185	0	99	99	1	N0	0	MD						0	1
0	1	1	40	1	74.5	170	25.78	99	99	2	11	8	1	2	99	99	150	0	99	99	2	N0	0	WD						0	3
0	1	99	58	1	66	171	22.57	99	99	11	11	9	1	11	99	99	178	100	99	1	2	N0	0	MD						0	3
0	1	99	65	1	56.6	167	20.29	99	99	2	2	6	1	2	99	99	209	0	99	99	1	N0	0	MD						0	1
0	1	99	51	2	51	158	20.43	99	99	11	2	11	1	11	99	99	190	0	99	99	1	N0	0	MD						0	2
0	1	99	66	1	75	170	25.95	1	99	2	2	17	1	11	1	99	240	0	99	99	2	N0	0	MD						0	3
0	1	99	49	1	60	171	20.52	99	99	11	3	12	1	11	1	99	254	300	99	1	3	N1	1	MD						0	3
0	1	99	62	1	90	179	28.09	99	99	2	2	10	1	11	99	99	243	250	99	99	2	N0	0	MD						0	3
0	1	99	46	2	45	154	18.97	99	99	11	2	8	1	11	99	99	110	0	99	99	2	N0	0	MD						0	3
0	1	99	75	1	52	160	20.31	99	99	11	11	8	1	11	99	99	82	0	99	99	2	N0	0	MD						0	3
0	1	99	59	1	74.8	172	24.99	99	99	2	11	19	1	11	99	99	165	0	99	99	4	N2	4	MD						0	4
0	1	99	66	2	54	153	23.07	99	99	11	2	8	1	11	99	99	185	0	99	99	3	N2	8	MD						0	3
0	1	99	65	2	43.3	146	20.04	1	99	2	2	15	1	11	99	99	165	0	99	99	2	N0	0	MD						0	3
0	1	99	69	2	46	150	20.44	99	1	11	2	25	1	11	99	99	104	0	99	99	3	N1	3	MD						0	3
0	1	99	51	2	50	155	20.81	99	99	11	11	8	1	11	99	99	110	0	99	99	2	N0	0	MD						0	3
0	1	1	41	1	73	175	23.84	99	99	11	2	10	1	11	99	99	210	200	99	1	1	N0	0	MD						0	2
0	1	99	69	1	55	162	20.96	99	99	2	2	12	1	11	99	99	179	0	99	99	2	N0	0	MD						0	3
0	1	99	54	2	62	152	26.84	99	99	2	2	10	1	11	99	99	288	0	99	99	2	N0	0	MD						0	3
0	1	99	56	1	52	164	19.33	99	99	11	2	20	1	11	99	1	364	650	99	1	2	N0	0	MD						0	3
0	1	1	78	2	44.9	141	22.58	99	99	11	2	10	1	11	99	99	170	0	99	99	1	N0	0	MD						0	2
0	1	99	71	2	52	154	21.93	99	1	2	2	10	1	11	99	99	125	0	99	99	2	N0	0	MD						0	3
0	1	1	53	1	60	165	22.04	99	99	2	2	10	1	11	99	99	127	200	99	99	1	N0	0	MD						0	2
0	1	99	34	1	67	162	25.53	99	99	2	2	13	1	11	99	99	145	0	99	99	2	N0	0	MD						0	3
0	1	99	55	1	63	164	23.42	99	99	2	11	11	1	11	99	99	220	400	99	99	1	N0	0	WD						0	1
0	1	1	46	2	52	159	20.57	99	99	11	2	8	1	3	99	1	330	500	99	99	3	N1	1	WD						0	1
0	1	1	62	1	68	168	24.09	99	99	2	11	17	1	2	1	99	392	500	1	99	2	N0	0	MD						0	3
0	1	1	52	1	62	168	21.97	1	99	2	2	5	1	3	99	99	123	0	99	99	3	N1	3	MD						0	1
0	1	1	56	1	59.6	171	20.38	99	99	2	2	8	1	3	99	99	331	0	99	99	3	N2	8	MD						0	3
0	1	1	74	1	80	172	27.04	99	99	3	2	51	1	2	99	99	349	0	1	99	2	N0	0	MD	C	1	6	1	2006-10-25	1	3
0	1	99	47	2	61	158	24.44	99	99	11	11	13	1	11	1	1	317	800	99	1	2	N0	0	MD						0	3
0	1	99	50	1	61	170	21.11	99	99	11	2	12	1	3	99	99	205	150	99	99	3	N2	4	MD						0	3
0	1	99	67	2	50	154	21.08	99	99	11	2	9	1	11	99	99	117	0	99	99	1	N0	0	MD						0	2
0	1	99	74	1	69	163	25.97	99	99	2	2	8	1	11	99	1	225	250	99	99	3	N2	7	MD						0	3
0	1	99	54	1	71	166	25.77	99	1	2	11	10	1	11	99	99	126	300	99	99	2	N0	0	MD						0	3
0	1	99	54	2	70	153	29.9	99	99	2	2	15	1	11	99	99	192	100	99	99	2	N0	0	MD						0	3
0	1	99	54	1	86	170	29.76	99	99	2	2	9	1	11	99	99	100	0	99	99	1	N0	0	WD						0	2
0	1	99	72	2	40	153	17.09	99	99	11	2	11	1	11	99	99	100	0	99	99	1	N0	0	MD						0	1
0	1	99	65	1	66	165	24.24	99	99	2	2	10	1	11	99	99	188	500	99	99	3	N2	7	MD						0	3
0	1	99	45	1	60	167	21.51	99	99	11	3	11	1	11	99	99	184	0	99	99	1	N0	0	MD	C	2	12	1	2006-12-06	1	2
0	1	99	59	2	62.9	150	27.96	99	99	2	11	11	1	11	99	99	135	0	99	99	2	N0	0	MD						0	3
0	1	99	54	1	58	175	18.94	99	99	11	2	29	1	11	99	1	373	1100	99	99	4	N3	15	MD						0	3
0	1	99	61	2	61	159	24.13	99	99	11	2	19	1	11	1	1	194	100	99	99	1	N0	0	WD						0	2
0	1	1	74	1	52	154	21.93	99	99	3	2	12	1	11	1	99	240	420	99	99	3	N1	1	MD						0	2
0	1	99	31	2	48	162	18.29	99	99	11	2	12	1	11	1	99	277	0	99	99	3	N1	3	MD						0	3
0	1	99	66	2	51.5	154	21.72	99	99	11	2	12	1	11	1	99	171	0	99	99	2	N0	0	MD						0	4
0	1	1	70	1	62.5	168	22.14	99	99	2	11	11	1	11	99	99	110	0	99	99	2	N0	0	MD						0	3
0	1	99	54	2	59	156	24.24	99	99	11	2	10	1	2	99	99	240	350	99	99	3	N1	3	MD						0	2
0	1	1	72	1	50	160	19.53	99	99	2	3	10	1	2	1	99	315	600	1	1	3	N1	1	Mucinous						0	3
0	1	1	75	1	60	157	24.34	99	99	11	3	8	1	2	1	99	240	0	99	1	2	N0	0	MD						0	3
0	1	99	60	2	59	148	26.94	1	99	2	2	13	1	11	99	99	178	0	99	99	3	N1	2	MD						0	2
0	1	1	72	1	60	161	23.15	99	99	3	2	10	1	2	1	99	150	100	99	99	1	N0	0	MD						0	1
0	1	99	45	2	60	158	24.03	99	99	11	2	8	1	11	99	99	173	300	99	99	3	N2	6	MD						0	3
0	1	1	67	1	51.8	162	19.74	99	99	2	2	13	1	3	99	99	335	0	99	99	2	N0	0	MD						0	3
0	1	1	66	1	81.3	168	28.47	1	99	2	11	8	1	2	99	1	247	400	99	99	1	N0	0	MD						0	1
0	1	99	59	1	65	169	22.76	99	99	11	2	11	1	11	99	99	135	0	99	99	2	N0	0	MD						0	3
0	1	1	64	1	63	164	23.42	99	99	11	2	23	1	11	1	99	239	500	99	1	2	N0	0	PD						0	3
0	1	1	60	1	76	170	26.3	99	99	2	3	10	1	11	99	99	144	0	99	99	1	N0	0	MD						0	2
0	1	1	58	1	57	165	20.94	99	99	11	2	18	1	11	1	99	195	0	99	99	3	N1	3	PD						0	3
0	1	99	71	2	58	162	22.1	99	99	11	2	10	1	11	99	1	180	0	99	99	1	N0	0	WD						0	2
0	1	99	63	1	60.5	166	21.96	99	99	11	11	11	1	11	99	99	160	0	99	99	2	N0	0	MD						0	3
0	1	99	79	2	60	152	25.97	99	99	2	11	12	1	11	99	99	203	200	99	99	3	N2	5	MD						0	3
0	1	1	59	1	85	180	26.23	99	99	2	11	10	1	11	1	99	180	0	99	99	2	N0	0	MD						0	3
0	1	99	55	1	51.6	155	21.48	99	99	11	2	14	1	11	99	99	150	1300	99	99	3	N1	1	MD						0	3
0	1	99	64	1	67.5	172	22.55	99	99	11	2	21	1	3	99	99	202	500	99	99	3	N2	9	MD						0	3
0	1	99	45	1	66	175	21.55	99	99	11	2	12	1	11	99	99	184	0	99	99	2	N0	0	MD						0	3
0	1	99	84	2	48.4	157	19.64	99	99	2	11	16	1	11	1	99	150	200	99	99	2	N0	0	MD						0	3
0	1	99	69	2	58	154	24.46	99	99	3	2	9	1	2	99	99	210	0	99	99	1	N0	0	MD						0	1
0	1	99	63	2	60.5	152	26.19	99	1	2	11	7	1	2	99	99	153	0	99	99	2	N0	0	MD						0	3
0	1	99	52	1	65	175	21.22	99	99	11	3	9	1	3	1	99	258	0	99	99	1	N0	0	MD						0	2
0	1	99	64	1	75.2	172	25.42	99	99	2	2	10	1	3	99	99	280	250	99	99	1	N0	0	MD						0	1
0	1	99	41	1	60	167	21.51	99	99	11	2	10	1	2	99	99	187	0	99	99	2	N0	0	MD						0	3
0	1	99	68	1	55	168	19.49	99	99	2	2	12	1	3	99	99	245	0	99	99	3	N2	4	MD						0	3
0	1	99	57	2	56	150	24.89	99	99	2	11	9	1	3	99	99	202	0	99	99	3	N2	20	PD						0	3
0	1	99	57	2	50	149	22.52	99	99	2	11	12	1	11	1	99	195	50	99	99	3	N1	3	MD						0	3
0	1	99	68	1	60.4	164	22.46	99	99	11	11	11	1	11	1	99	230	0	99	1	2	N0	0	MD						0	3
0	1	99	66	2	61.1	145	29.06	99	99	2	11	9	1	2	99	99	125	0	99	99	3	N1	2	MD						0	3
0	1	1	52	1	65	170	22.49	99	99	11	2	10	1	3	99	99	271	0	99	99	1	N0	0	MD						0	2
0	1	1	65	1	57	162	21.72	99	1	11	3	14	1	11	1	99	247	200	99	99	2	N0	0	MD						0	3
0	1	99	57	1	70	173	23.39	99	99	11	2	9	1	11	99	99	137	30	99	99	1	N0	0	MD						0	2
0	1	99	60	1	78	168	27.64	99	99	2	2	14	1	11	99	1	537	850	99	1	4	N0	0	MD						0	3
0	1	99	69	1	67	162	25.53	99	99	2	3	12	1	11	99	99	215	500	99	99	1	N0	0	MD						0	2
0	1	99	69	1	70	176	22.6	99	99	11	2	9	1	2	99	99	173	0	99	99	4	N1	2	MD						0	3
0	1	99	43	1	52	170	17.99	99	99	11	2	6	1	3	99	99	144	0	99	99	2	N0	0	WD						0	3
0	1	99	67	1	60	162	22.86	99	99	11	2	10	1	11	99	99	157	0	99	99	2	N0	0	MD						0	3
0	1	1	44	2	46	152	19.91	99	99	11	2	23	1	11	99	99	154	300	99	99	4	N1	2	MD						0	4
0	1	1	38	1	75	176	24.21	99	99	11	11	9	1	11	99	99	169	250	99	1	2	N0	0	MD						0	3
0	1	99	55	2	64	159	25.32	99	99	2	2	7	1	3	99	99	170	0	99	99	1	N0	0	WD						0	1
0	1	99	79	2	48	152	20.78	99	99	2	2	26	1	2	1	1	407	1100	1	99	2	N0	0	MD						0	3
0	1	99	74	1	64.8	169	22.69	99	99	11	2	10	1	11	1	99	151	80	99	99	2	N0	0	MD						0	3
0	1	99	46	1	81	168	28.7	1	99	2	11	19	1	11	99	99	205	0	99	99	1	N0	0	WD						0	1
0	1	99	41	1	61	165	22.41	99	99	11	3	7	1	11	99	99	153	300	99	99	1	N0	0	MD						0	2
0	1	99	47	1	66.1	168	23.42	99	99	11	2	15	1	11	99	99	138	0	99	99	3	N1	1	MD						0	3
0	1	99	59	1	65	165	23.88	99	99	11	2	7	1	11	99	99	112	200	99	99	1	N0	0	MD						0	1
0	1	99	57	2	67	159	26.5	99	99	2	11	14	1	3	99	99	185	0	99	99	3	N1	2	WD						0	3
0	1	99	78	2	53	148	24.2	99	99	11	2	12	1	3	99	1	395	700	99	99	2	N0	0	MD						0	4
0	1	99	55	2	62	152	26.84	99	99	2	2	16	1	3	1	99	299	0	99	99	2	N0	0	MD						0	3
0	1	99	48	2	58	156	23.83	99	99	11	2	16	1	11	99	1	380	350	99	99	4	N2	9	MD						0	3
0	1	99	59	2	67.1	150	29.82	99	99	2	2	12	1	11	99	99	123	0	99	99	1	N0	0	MD						0	2
0	1	1	63	2	51	143	24.94	99	99	11	2	8	1	2	99	99	100	0	99	99	3	N1	2	MD						0	3
0	1	99	60	1	65	170	22.49	99	99	11	11	7	1	3	99	99	170	0	99	99	1	N0	0	MD						0	2
0	1	99	73	1	60	163	22.58	99	99	2	11	8	1	3	99	99	198	0	99	99	2	N0	0	MD						0	3
0	1	99	48	2	36	147	16.66	99	99	11	11	11	1	11	99	1	215	100	99	99	2	N0	0	MD	C	3	20	1	2007-06-04	2	3
0	1	1	64	1	80	176	25.83	99	99	2	2	12	1	11	99	99	294	70	99	99	3	N2	4	MD						0	3
0	1	99	71	1	58	154	24.46	99	1	11	11	68	1	11	99	1	381	0	99	99	4	N2	12	WD	C	1	7	1	2007-04-02	0	3
0	1	99	74	1	59.5	165	21.85	99	99	2	2	12	1	2	99	99	188	100	99	99	2	N0	0	MD						0	3
0	1	1	63	1	79	170	27.34	99	99	2	3	8	1	3	1	99	219	200	99	99	1	N0	0	WD						0	2
0	1	99	77	2	68.2	144	32.44	99	99	2	2	7	1	3	99	99	300	500	99	99	1	N0	0	MD						0	2
0	1	99	57	2	64.8	161	25	99	99	11	2	26	1	11	99	99	168	0	99	99	1	N0	0	MD						0	2
0	1	1	57	1	75	171	25.65	1	99	2	2	8	1	2	99	99	185	0	99	99	4	N2	9	MD						0	3
0	1	99	56	1	64	169	22.41	99	99	11	2	11	1	11	99	99	164	300	99	99	1	N0	0	WD						0	2
0	1	1	69	1	59	163	22.21	99	99	11	11	8	1	3	99	99	210	0	99	99	2	N0	0	MD						0	3
0	1	1	62	1	79	177	25.22	1	99	2	11	7	1	3	99	1	305	0	99	99	1	N0	0	WD						0	1
0	1	99	70	1	67	169	23.46	1	99	2	2	9	1	2	1	99	257	100	99	99	3	N1	1	MD						0	3
0	1	99	74	1	54.6	162	20.8	99	99	11	11	9	1	11	99	99	210	0	99	99	2	N0	0	WD						0	3
0	1	1	58	1	84	173	28.07	1	99	3	11	20	1	2	99	99	214	0	99	99	3	N1	2	MD	C	2	8	1	2007-06-23	0	1
0	1	99	46	2	66.4	168	23.53	99	99	11	2	9	1	2	99	99	360	0	99	99	1	N0	0	WD						0	1
0	1	99	72	2	62	152	26.84	99	99	2	2	21	1	11	99	99	368	1500	99	99	1	N0	0	WD						0	2
0	1	1	55	1	75	168	26.57	99	99	2	11	7	1	3	99	99	175	0	99	99	1	N0	0	WD						0	1
0	1	99	47	1	69	172	23.32	99	99	11	2	8	1	11	99	99	175	200	99	99	3	N2	5	WD						0	3
0	1	99	73	1	59.8	157	24.26	99	99	2	11	17	1	2	99	99	386	50	99	99	3	N1	1	MD						0	2
0	1	99	57	2	64	163	24.09	99	99	11	2	21	1	3	99	99	205	0	99	99	3	N2	5	MD						0	2
0	1	1	64	1	53	158	21.23	99	99	2	3	7	1	3	1	99	206	0	99	99	1	N0	0	WD						0	2
0	1	99	72	2	65	146	30.49	99	99	2	2	9	1	2	99	99	284	50	99	99	2	N0	0	WD						0	3
0	1	99	56	2	58.2	158	23.35	99	99	11	11	13	1	2	1	99	283	50	99	99	2	N0	0	WD						0	3
0	1	99	59	1	55.6	165	20.46	99	99	11	2	14	1	11	99	99	358	300	99	99	3	N1	3	WD						0	4
0	1	99	51	1	79	174	26.09	99	99	2	2	10	1	11	1	99	220	300	99	99	3	N2	5	MD						0	3
0	1	99	37	1	67	173	22.39	99	99	11	2	11	1	2	99	99	251	200	1	99	2	N0	0	WD						0	3
0	1	99	50	2	58	167	20.8	99	99	11	3	8	1	3	99	99	250	0	99	99	1	N0	0	PD						0	1
0	1	1	62	1	59.5	165	21.85	99	99	11	11	11	1	11	99	99	206	1000	99	99	2	N0	0	WD						0	3
0	1	99	61	2	54	158	21.63	99	99	2	3	8	1	3	99	99	165	0	99	99	2	N0	0	WD						0	3
0	1	99	62	2	42.5	154	17.92	99	99	11	3	24	1	2	99	99	242	0	99	99	4	N2	7	MD	C	1	4	1	2007-05-27	1	3
0	1	99	45	2	61	160	23.83	99	99	11	3	16	1	11	99	1	245	200	99	99	4	N2	6	MD						0	3
0	1	1	64	1	75.6	176	24.41	99	99	2	3	9	1	11	99	99	134	0	99	99	1	N0	0	WD						0	2
0	1	99	72	2	70	142	34.72	99	99	2	3	17	1	11	99	1	226	30	99	99	3	N1	1	PD	C	3	18	1	2007-07-20	2	3
0	1	99	62	1	64.1	174	21.17	1	99	2	2	16	1	3	99	99	207	0	99	99	4	N1	2	WD						0	4
0	1	99	60	1	48	164	17.85	99	99	11	11	27	1	11	99	99	336	0	99	99	1	N0	0	WD						0	1
0	1	99	58	2	45	147	20.82	1	99	2	2	7	1	2	99	99	240	0	99	1	2	N0	0	MD						0	3
0	1	99	67	1	63	167	22.59	99	99	2	2	11	1	11	1	99	539	800	99	1	4	N1	3	MD						0	3
0	1	99	59	1	68	170	23.53	99	1	2	11	8	1	2	99	99	240	90	99	99	1	N0	0	MD						0	1
0	1	1	52	1	62	165	22.77	99	99	11	11	10	1	11	99	99	183	1200	99	1	3	N2	5	Mucinous						0	3
0	1	99	61	1	70.5	165	25.9	99	99	2	2	20	1	11	99	99	180	400	99	99	3	N2	11	WD						0	3
0	1	99	54	1	70	166	25.4	99	99	2	11	7	1	3	99	99	201	0	99	99	2	N0	0	WD						0	3
0	1	99	70	1	57	160	22.27	1	99	2	11	10	1	3	99	1	385	250	99	99	4	N2	34	MD						0	4
0	1	99	56	2	52	150	23.11	1	99	2	11	9	1	3	99	99	222	0	99	99	3	N2	10	MD						0	3
0	1	1	74	1	80	171	27.36	99	99	2	3	16	1	11	1	99	153	200	99	99	3	N1	1	MD						0	3
0	1	99	82	2	58	147	26.84	99	99	2	11	29	1	11	99	99	120	0	99	99	2	N0	0	WD						0	3
0	1	1	61	1	77.2	170	26.71	99	99	2	2	12	1	2	99	99	330	0	99	99	1	N0	0	MD						0	1
0	1	99	50	2	48	158	19.23	99	99	11	2	10	1	2	99	99	290	0	99	99	1	N0	0	WD						0	1
0	1	99	48	1	84	173	28.07	99	99	2	2	10	1	11	99	99	170	0	99	99	1	N0	0	WD						0	1
0	1	1	78	1	52	172	17.58	1	99	2	2	10	1	2	1	99	249	0	99	1	3	N2	7	MD						0	3
0	1	99	66	1	58	157	23.53	99	99	11	11	9	1	2	99	99	110	0	99	99	2	N0	0	MD						0	4
0	1	99	57	1	73	168	25.86	1	99	2	2	13	1	3	99	99	269	0	99	99	1	N0	0	WD						0	1
0	1	99	55	1	53	168	18.78	99	99	11	2	19	1	2	99	99	162	0	99	99	4	N2	7	MD	C	1	2	1	2007-08-19	1	3
0	1	1	50	1	67	173	22.39	99	99	11	11	6	1	3	99	99	205	0	99	99	2	N0	0	MD						0	3
0	1	99	81	2	48	142	23.8	99	99	2	2	41	1	11	99	99	371	500	99	99	3	N1	2	MD						0	2
0	1	99	61	1	61	165	22.41	99	99	2	2	19	1	11	1	99	254	500	99	99	3	N2	5	MD						0	3
0	1	99	67	1	64	178	20.2	99	99	2	2	45	1	11	99	99	335	200	99	99	1	N0	0	MD						0	2
0	1	1	45	1	67	164	24.91	99	99	11	2	12	1	11	99	99	150	0	99	1	2	N0	0	MD						0	3
0	1	1	56	1	60	157	24.34	99	99	2	2	8	1	3	99	99	187	20	99	99	2	N0	0	MD						0	3
0	1	99	44	1	69	168	24.45	99	99	2	2	9	1	11	1	99	498	600	99	1	4	N2	30	MD						0	3
0	1	99	59	2	72	163	27.1	99	99	2	2	15	1	11	99	99	135	300	99	99	2	N0	0	MD						0	3
0	1	99	61	1	70	171	23.94	99	99	11	2	22	1	2	1	99	267	0	99	99	1	N0	0	WD						0	1
0	1	99	52	1	80	170	27.68	99	99	2	2	14	1	2	99	99	264	0	99	99	2	N0	0	MD						0	3
0	1	1	62	1	62	167	22.23	1	99	2	2	14	1	11	99	99	177	0	99	99	3	N1	3	MD						0	4
0	1	99	45	2	54	162	20.58	99	99	11	2	30	1	11	99	1	313	210	99	99	2	N0	0	MD						0	4
0	1	99	67	1	59	167	21.16	99	99	2	3	17	1	11	1	99	157	0	99	99	3	N1	1	MD						0	3
0	1	99	65	2	55	150	24.44	99	99	11	3	10	1	11	1	99	160	500	99	99	1	N0	0	MD						0	2
0	1	99	62	2	57.8	152	25.02	99	99	2	2	11	1	2	1	99	295	0	99	99	1	N0	0	WD						0	1
0	1	99	69	1	68	180	20.99	99	99	11	3	10	1	11	1	99	333	1550	99	1	1	N0	0	MD						0	2
0	1	99	65	1	54	160	21.09	99	99	11	2	10	1	11	99	99	330	250	99	99	1	N0	0	MD						0	2
0	1	99	50	1	57.5	168	20.37	99	99	11	2	34	1	11	99	99	190	100	99	99	2	N0	0	MD	C	1	7	1	2007-10-31	1	3
0	1	99	66	1	69	172	23.32	1	99	2	3	12	1	11	99	99	168	0	99	99	1	N0	0	MD						0	2
0	1	1	63	1	54	178	17.04	99	1	11	2	7	1	2	99	99	154	0	99	99	3	N1	2	MD						0	3
0	1	99	39	1	70	166	25.4	99	99	2	11	7	1	3	99	99	180	400	99	99	3	N1	2	MD						0	3
0	1	99	66	1	77	167	27.61	99	99	2	2	12	1	3	99	99	264	50	99	99	1	N0	0	MD						0	2
0	1	99	75	2	58.4	156	24	1	99	3	3	20	1	2	1	99	164	0	99	99	3	N1	1	MD						0	3
0	1	99	40	2	62	165	22.77	99	99	11	2	18	1	11	99	1	176	500	99	99	2	N0	0	MD						0	3
0	1	99	50	2	65.6	162	24.69	99	99	11	3	14	1	3	1	99	290	0	99	1	2	N0	0	PD						0	3
0	1	1	68	1	57.5	164	21.38	99	99	11	2	18	1	11	99	99	175	0	99	99	1	N0	0	MD						0	2
0	1	99	65	1	50	166	18.14	99	99	11	2	15	1	11	99	99	163	200	99	99	3	N1	3	MD						0	3
0	1	99	46	2	54	154	22.77	1	99	2	2	13	1	11	99	1	190	0	99	99	3	N1	2	MD						0	3
0	1	1	66	1	59	168	20.9	99	99	11	11	12	1	2	99	99	330	0	99	99	2	N0	0	MD						0	3
0	1	99	70	1	59.8	166	21.44	99	99	2	3	12	1	11	1	99	155	0	99	1	1	N0	0	WD						0	1
0	1	99	35	2	52	156	21.37	99	1	11	2	16	1	11	99	99	230	0	99	99	2	N0	0	MD						0	3
0	1	99	68	1	55	170	19.03	99	99	11	2	37	1	2	99	99	164	100	99	99	0	N0	0	WD						0	0
0	1	99	37	2	60	163	22.58	99	1	11	2	14	1	11	99	99	176	400	99	99	3	N1	1	MD						0	3
0	1	1	58	1	69.8	170	24.15	99	99	11	11	10	1	2	99	99	228	0	99	99	1	N0	0	MD						0	1
0	1	1	57	1	75	168	26.57	99	99	2	11	11	1	2	99	99	358	0	99	99	1	N0	0	MD						0	2
0	1	99	48	2	55	160	21.48	99	99	11	11	10	1	2	99	99	180	40	99	99	2	N0	0	MD						0	3
0	1	99	54	2	52	169	18.21	99	99	11	11	9	1	2	99	99	276	0	99	99	1	N0	0	WD						0	1
0	1	99	62	2	58	160	22.66	99	99	11	11	11	1	11	99	1	131	50	99	99	3	N1	1	MD						0	2
0	1	1	57	1	58	172	19.61	99	99	11	2	11	1	11	99	99	248	50	99	99	1	N0	0	WD						0	1
0	1	99	60	1	54	161	20.83	99	99	11	2	6	1	3	1	99	225	200	99	99	3	N1	1	MD						0	3
0	1	99	75	1	75	175	24.49	99	99	11	11	11	1	2	99	99	225	0	99	99	2	N0	0	WD						0	3
0	1	99	49	1	82	178	25.88	99	99	2	3	6	1	3	99	99	170	0	99	99	2	N0	0	MD						0	3
0	1	1	58	1	62	167	22.23	99	99	11	11	5	1	3	99	99	117	0	99	99	1	N0	0	WD						0	2
0	1	99	44	2	46.5	159	18.39	1	99	2	11	5	1	3	99	99	170	150	99	99	3	N1	2	MD						0	3
0	1	99	59	2	58	165	21.3	99	99	11	2	6	1	3	99	99	150	0	99	99	1	N0	0	MD						0	2
0	1	99	52	1	72	166	26.13	99	99	2	11	5	1	3	99	99	112	0	99	99	3	N1	1	WD						0	3
0	1	1	61	1	53	168	18.78	99	1	11	11	6	1	3	99	99	170	0	99	99	1	N0	0	MD						0	2
0	1	99	44	2	57	165	20.94	99	99	11	2	6	1	3	99	99	205	50	99	99	3	N1	1	MD						0	3
0	1	1	50	1	59	170	20.42	99	99	2	2	9	1	3	1	99	196	0	99	99	3	N1	3	MD						0	2
0	1	99	69	1	68	160	26.56	99	99	2	11	12	1	11	99	99	162	300	99	99	3	N2	5	WD						0	3
0	1	99	73	2	48	160	18.75	99	1	11	3	11	1	11	99	99	140	150	99	99	1	N0	0	WD						0	2
0	1	99	45	1	79	173	26.4	99	1	2	3	14	1	11	99	99	146	100	99	99	3	N2	4	MD						0	4
0	1	99	66	1	65.6	170	22.7	99	99	2	11	12	1	2	99	99	220	0	99	99	3	N2	9	MD						0	2
0	1	99	62	1	57.5	166	20.87	99	99	11	11	11	1	11	1	99	202	0	99	1	2	N0	0	MD						0	3
0	1	99	53	2	60	159	23.73	99	99	11	2	18	1	2	99	99	227	0	99	99	1	N0	0	MD	C	1	4	1	2007-12-28	1	2
0	1	99	51	1	54	160	21.09	99	99	11	2	28	1	11	99	99	162	0	99	99	1	N0	0	MD						0	2
0	1	99	35	2	50	160	19.53	99	99	11	2	12	1	11	99	1	252	100	99	99	4	N0	0	WD						0	3
0	1	99	67	2	58.2	155	24.27	99	99	11	2	10	1	11	99	99	172	0	99	99	3	N1	1	WD						0	3
0	1	99	72	1	65.8	159	26.03	99	99	2	11	10	1	2	99	99	185	0	99	99	1	N0	0	MD						0	1
0	1	99	61	2	56	146	25.92	99	1	2	3	12	1	11	99	99	208	50	99	99	3	N1	3	MD						0	3
0	1	1	52	1	68	166	24.68	99	99	11	11	11	1	11	1	99	122	300	99	99	2	N0	0	MD						0	3
0	1	99	58	2	60	153	25.63	99	99	2	3	10	1	11	1	99	150	200	99	1	1	N0	0	WD						0	1
0	1	1	65	1	66	171	22.57	99	99	11	11	12	1	2	99	99	243	0	99	99	2	N0	0	MD						0	3
0	1	1	54	1	68	169	23.81	99	99	11	2	6	1	3	99	99	207	0	99	99	3	N2	13	MD						0	3
0	1	99	82	2	45.8	149	20.63	1	99	2	2	48	1	2	99	99	140	100	99	99	2	N0	0	WD						0	3
0	1	1	74	1	50	160	19.53	99	99	2	2	6	1	3	99	99	161	50	99	99	1	N0	0	MD						0	2
0	1	99	75	1	73	167	26.18	99	99	2	11	5	1	3	99	99	270	0	99	99	3	N2	4	MD						0	3
0	1	99	78	1	53.5	162	20.14	99	99	11	11	18	1	2	99	99	161	0	99	99	3	N1	1	MD	C	1	2	1	2007-11-21	1	3
0	1	99	78	2	44	151	19.3	99	99	11	2	8	1	3	99	99	182	0	99	99	4	N0	0	WD						0	3
0	1	99	80	2	65	160	25.39	99	99	2	3	21	1	11	99	99	218	0	99	99	2	N0	0	MD						0	3
0	1	99	60	2	53.3	148	24.33	99	99	11	2	19	1	11	99	99	193	200	99	99	3	N1	1	MD						0	3
0	1	1	61	1	59.7	170	20.66	1	99	2	11	15	1	11	99	99	112	200	99	99	3	N1	3	MD						0	3
0	1	99	71	1	51	160	19.92	99	1	11	2	32	1	11	99	99	252	700	99	99	2	N0	0	MD						0	3
0	1	99	34	2	46	165	16.9	99	99	11	2	9	1	11	99	99	154	150	99	1	2	N0	0	MD						0	3
0	1	1	62	1	54	160	21.09	99	99	11	2	10	1	2	1	99	230	0	99	99	1	N0	0	MD						0	2
0	1	99	54	2	52.9	149	23.83	99	99	11	2	12	1	11	99	99	317	100	99	99	4	N1	2	MD						0	3
0	1	99	71	1	63	166	22.86	99	99	3	11	9	1	2	99	99	246	0	99	99	1	N0	0	WD						0	1
0	1	99	66	1	62	163	23.34	99	99	2	2	11	1	11	99	99	97	200	99	99	1	N0	0	MD						0	2
0	1	1	61	1	59	168	20.9	99	99	11	2	8	1	3	99	99	155	0	99	99	3	N1	1	MD						0	3
0	1	99	71	1	63	171	21.55	1	99	2	11	5	1	3	99	99	135	100	99	99	2	N0	0	WD						0	3
0	1	1	58	1	71	175	23.18	1	99	2	11	5	1	3	99	99	153	0	99	99	3	N1	1	MD						0	2
0	1	99	46	1	74	170	25.61	99	99	2	11	22	1	11	99	99	194	0	99	99	2	N0	0	MD						0	3
0	1	99	72	1	50	158	20.03	99	99	11	11	17	1	11	99	99	192	300	99	99	2	N0	0	MD						0	3
0	1	1	64	1	76.6	169	26.82	99	99	2	2	12	1	11	1	99	327	200	99	99	2	N0	0	MD						0	3
0	1	1	70	1	47	168	16.65	99	1	11	11	9	1	2	99	99	170	200	99	99	3	N1	1	WD						0	1
0	1	99	62	1	48	168	17.01	99	99	11	11	9	1	11	99	99	189	700	99	99	2	N0	0	MD						0	3
0	1	99	55	1	63.9	166	23.19	99	99	11	2	20	1	11	99	99	188	250	99	99	3	N2	18	PD						0	3
0	1	99	60	2	52.9	144	25.16	99	99	2	2	13	1	11	99	99	163	100	99	99	3	N1	3	MD						0	3
0	1	99	42	2	52	162	19.81	99	99	11	11	8	1	2	99	99	421	300	99	99	3	N1	1	MD						0	3
0	1	99	51	2	62	154	26.14	99	99	2	2	10	1	2	99	99	313	0	99	99	4	N2	4	MD						0	3
0	1	99	73	2	62	164	23.05	1	99	3	11	19	1	3	99	99	122	0	99	99	2	N0	0	MD						0	3
0	1	99	64	1	69	167	24.74	99	99	11	2	9	1	2	99	99	474	700	99	99	3	N2	4	MD						0	3
0	1	99	55	2	51.8	148	23.65	99	1	11	2	11	1	2	99	99	331	0	99	99	3	N1	3	WD						0	2
0	1	99	64	1	75	171	25.65	99	1	2	3	6	1	3	1	99	277	150	99	99	3	N1	1	MD						0	3
0	1	99	45	2	55	158	22.03	99	99	11	2	10	1	11	99	99	340	400	99	99	4	N0	0	MD						0	3
0	1	99	71	1	55	160	21.48	99	99	3	3	12	1	11	99	99	195	500	99	1	2	N0	0	WD						0	3
0	1	99	53	2	60	153	25.63	99	99	2	2	8	1	3	99	99	147	300	99	99	3	N1	3	MD						0	3
0	1	99	70	2	50	146	23.46	99	1	2	2	11	1	3	99	99	171	0	99	99	3	N1	1	MD						0	3
0	1	99	71	1	68	166	24.68	99	99	2	11	7	1	2	99	99	156	0	99	99	3	N1	2	MD						0	3
0	1	99	59	2	63	155	26.22	99	1	2	11	7	1	3	99	99	154	0	99	99	1	N0	0	MD						0	2
0	1	99	65	2	53	147	24.53	1	99	2	2	11	1	2	99	99	264	0	99	99	3	N2	4	WD						0	3
0	1	99	52	2	69	159	27.29	99	1	2	11	8	1	2	99	99	332	0	99	99	1	N0	0	WD						0	2
0	1	99	68	2	55	160	21.48	99	99	11	2	11	1	3	99	99	165	100	99	99	1	N0	0	MD						0	1
0	1	1	70	1	59	168	20.9	99	99	11	2	6	1	3	99	99	201	0	99	99	3	N1	1	WD						0	2
0	1	99	79	2	50.7	146	23.78	99	99	11	2	10	1	11	99	99	102	100	99	99	3	N1	2	MD						0	3
0	1	1	69	2	53	141	26.66	99	99	2	2	23	1	11	99	99	118	150	99	99	4	N1	3	MD						0	3
0	1	99	52	1	63.5	168	22.5	99	99	11	11	17	1	11	99	99	163	0	99	99	3	N2	8	MD						0	3
0	1	1	53	1	64.5	174	21.3	99	99	11	3	16	1	11	99	99	171	500	99	99	3	N2	6	MD						0	2
0	1	99	66	2	71	158	28.44	99	99	2	2	20	1	11	99	99	194	700	99	99	2	N0	0	MD						0	3
0	1	99	51	2	70	164	26.03	99	99	2	2	41	1	11	99	99	213	0	99	99	3	N2	6	MD						0	2
0	1	99	74	1	50	165	18.37	99	99	11	2	49	1	11	99	99	252	300	99	99	1	N0	0	WD						0	2
0	1	99	70	1	65	179	20.29	1	99	2	11	18	1	11	99	99	225	300	99	99	3	N1	1	MD						0	3
0	1	1	58	1	76	180	23.46	1	99	2	2	8	1	2	99	99	204	0	99	1	2	N0	0	MD						0	3
0	1	99	73	1	48.5	158	19.43	99	99	2	2	11	1	3	99	99	150	50	99	99	3	N2	4	MD						0	4
0	1	99	72	2	43	144	20.74	1	1	2	2	7	1	2	99	99	159	0	99	99	3	N1	1	MD						0	4
0	1	99	54	2	54.2	158	21.71	99	99	11	2	13	1	3	99	99	241	0	99	99	4	N1	1	MD						0	3
0	1	1	76	1	72	170	24.91	99	99	2	11	11	1	2	99	99	169	0	99	99	1	N0	0	WD						0	2
0	1	1	72	1	62.3	164	23.16	1	1	2	11	7	1	2	99	99	156	0	99	99	1	N0	0	MD						0	2
0	1	1	49	1	71	171	24.28	99	99	11	2	12	1	3	1	99	280	150	99	99	3	N2	6	PD						0	3
0	1	1	57	1	81	175	26.45	99	99	2	11	8	1	3	99	99	200	0	99	99	2	N0	0	MD						0	3
0	1	1	50	1	61.8	168	21.9	1	99	2	3	7	1	2	99	99	252	200	99	1	3	N2	5	Mucinous						0	3
0	1	99	75	1	47	164	17.47	1	1	2	3	7	1	2	99	99	214	0	1	99	3	N2	7	WD						0	3
0	1	99	57	1	66	174	21.8	1	99	2	3	19	1	11	99	99	306	2000	99	99	2	N0	0	MD						0	3
0	1	99	72	1	56	166	20.32	99	99	2	2	8	1	2	99	99	337	500	99	99	3	N2	8	MD						0	3
0	1	1	71	1	63	169	22.06	99	99	2	2	9	1	2	99	99	361	200	99	99	3	N2	4	PD						0	3
0	1	99	58	1	60	164	22.31	99	99	11	2	7	1	2	99	99	149	100	99	99	0	N0	0	WD						0	0
0	1	99	50	1	69.6	175	22.73	99	99	2	2	9	1	3	1	99	263	0	99	99	2	N0	0	MD						0	3
0	1	1	50	1	75	171	25.65	99	99	2	11	7	1	3	99	99	142	0	99	99	3	N2	4	MD						0	3
0	1	99	65	2	51	142	25.29	99	99	2	3	10	1	11	1	99	234	0	99	1	3	N2	11	MD						0	3
0	1	1	58	1	74	174	24.44	99	99	2	11	7	1	3	99	99	295	350	99	99	2	N0	0	MD						0	4
0	1	99	46	1	59.6	165	21.89	99	99	2	2	17	1	2	99	99	126	0	99	99	3	N1	1	MD						0	3
0	1	1	68	2	53	154	22.35	1	99	2	3	7	1	3	99	99	185	0	99	99	1	N0	0	WD						0	1
0	1	99	86	2	40	155	16.65	99	99	2	3	20	1	3	99	99	225	100	99	99	1	N0	0	MD						0	2
0	1	1	49	1	69	166	25.04	99	99	2	11	8	1	3	99	99	328	200	99	99	4	N1	3	WD						0	3
0	1	99	34	2	67.5	168	23.92	99	99	11	2	13	1	3	1	99	560	200	99	99	1	N0	0	PD	C	3	21	1	2008-04-28	2	2
0	1	1	57	1	58	167	20.8	99	99	11	11	36	1	11	99	1	398	600	99	1	4	N2	5	MD						0	3
0	1	99	77	1	59.5	156	24.45	99	99	11	11	14	1	2	1	99	278	0	99	99	1	N0	0	WD						0	1
0	1	1	51	1	73	171	24.96	1	99	2	11	10	1	3	99	99	455	50	99	99	3	N1	1	MD						0	3
0	1	99	65	1	77	172	26.03	99	99	2	11	10	1	2	99	99	289	200	99	99	1	N0	0	WD						0	1
0	1	1	50	1	75	173	25.06	99	99	2	2	10	1	11	1	99	253	50	99	99	1	N0	0	WD						0	2
0	1	99	71	2	60	150	26.67	1	99	2	2	12	1	11	99	99	414	1100	99	1	3	N1	3	MD						0	3
0	1	1	46	1	68	170	23.53	99	99	2	2	10	1	11	99	99	197	0	99	99	2	N0	0	MD						0	3
0	1	99	60	2	53.2	144	25.66	99	1	2	2	12	1	11	99	99	335	700	99	99	3	N1	2	MD						0	3
0	1	99	84	2	60	153	25.63	1	99	2	2	21	1	2	99	99	311	600	99	99	3	N1	1	MD						0	3
0	1	99	72	1	58	172	19.61	99	99	11	11	8	1	2	99	99	233	0	99	99	1	N0	0	WD						0	1
0	1	99	57	1	58	159	22.94	1	99	2	2	16	1	11	99	99	209	500	99	99	1	N0	0	MD						0	2
0	1	99	48	1	68	169	23.81	99	99	11	2	9	1	11	99	99	162	0	99	99	1	N0	0	MD						0	2
0	1	99	72	2	58.3	157	23.65	99	99	11	3	12	1	11	99	99	184	100	99	1	3	N1	3	MD						0	3
0	1	99	61	2	53.6	150	23.87	99	99	2	2	10	1	2	1	99	380	0	99	1	3	N1	1	WD						0	2
0	1	99	72	2	53	150	23.56	99	99	11	11	13	1	11	99	99	185	0	1	99	3	N2	19	MD						0	3
0	1	99	66	1	55	163	20.7	99	1	11	11	10	1	11	99	99	352	900	99	99	3	N1	3	MD						0	3
0	1	1	50	1	73	172	24.68	99	99	11	2	6	1	3	99	99	142	0	99	99	1	N0	0	WD						0	1
0	1	99	72	2	61	160	23.83	99	99	11	2	5	1	3	99	99	166	0	99	99	3	N2	4	MD						0	3
0	1	99	64	1	78.6	173	26.26	99	99	2	11	7	1	2	99	99	177	0	99	99	1	N0	0	MD						0	1
0	1	1	64	1	68	166	24.68	1	99	2	2	7	1	3	99	99	354	150	99	99	3	N2	4	MD						0	4
0	1	1	65	1	72	168	25.51	99	99	2	3	6	1	3	99	99	192	450	99	99	3	N1	3	MD						0	3
0	1	99	45	2	60	164	22.31	99	99	11	11	5	1	3	99	99	134	100	99	99	3	N1	2	MD						0	3
0	1	1	64	1	73	163	27.48	1	99	2	3	8	1	3	99	99	324	500	99	1	1	N0	0	MD						0	2
0	1	99	77	2	52	156	21.37	99	99	2	11	9	1	2	99	99	124	0	99	99	2	N0	0	MD						0	3
0	1	99	32	2	50	162	19.05	99	99	11	3	7	1	3	99	99	154	0	99	99	1	N0	0	MD						0	2
0	1	99	51	1	67.4	178	21.27	1	99	2	2	8	1	3	99	99	256	0	99	99	4	N2	4	MD						0	3
0	1	1	62	1	56.5	170	19.32	99	99	11	2	6	1	3	99	1	310	100	99	99	4	N1	2	WD						0	3
0	1	1	48	1	63	168	22.32	99	99	2	2	6	1	3	99	99	143	0	99	99	3	N1	1	MD						0	3
0	1	99	42	2	52.4	162	19.97	99	99	11	3	8	1	3	99	99	173	100	99	99	0	N0	0	WD						0	0
0	1	99	44	1	65	170	22.49	99	99	11	11	8	1	11	99	99	239	500	99	99	3	N1	1	MD						0	2
0	1	99	55	2	69	152	29.86	99	1	2	2	10	1	2	99	99	374	0	99	99	3	N1	1	MD						0	3
0	1	99	42	2	59.5	156	24.45	99	99	2	2	9	1	2	99	1	307	350	99	99	1	N0	0	MD						0	1
0	1	99	76	1	54	159	21.36	99	99	11	11	15	1	2	99	99	324	0	99	99	4	N1	3	MD						0	3
0	1	1	56	1	67.2	166	24.1	99	99	11	11	9	1	2	99	99	247	400	99	99	2	N0	0	MD						0	3
0	1	1	85	1	56	170	19.38	99	99	2	2	10	1	11	99	99	192	100	99	99	3	N1	1	MD						0	4
0	1	99	65	2	48	158	19.23	99	99	11	2	17	1	11	99	99	217	1300	99	99	1	N0	0	MD						0	2
0	1	99	76	1	55	161	21.22	99	1	11	11	13	1	2	99	99	462	750	1	99	2	N0	0	MD						0	3
0	1	99	56	2	58.5	156	23.73	1	99	2	11	18	1	2	99	99	286	100	99	99	3	N1	3	MD						0	3
0	1	99	56	2	63.9	157	25.92	1	1	2	11	19	1	2	99	99	363	200	1	99	3	N1	3	MD						0	4
0	1	1	53	1	61	166	22.14	99	99	2	2	8	1	3	99	99	563	600	99	99	1	N0	0	WD						0	2
0	1	99	52	2	55	153	23.5	99	99	11	2	10	1	2	99	99	292	0	99	99	2	N0	0	MD						0	3
0	1	1	51	1	63	169	22.06	99	99	11	2	16	1	2	99	99	298	0	99	99	3	N2	4	MD						0	3
0	1	99	48	2	53	152	22.64	1	1	2	2	16	1	11	99	1	335	600	99	99	4	N1	3	WD						0	3
0	1	99	72	2	68	151	29.82	1	99	2	2	9	1	2	99	99	270	0	99	99	1	N0	0	WD						0	2
0	1	99	62	2	58	158	23.23	99	99	11	2	8	1	2	99	99	148	100	99	99	3	N2	10	MD						0	3
0	1	1	80	1	62	167	22.23	1	99	2	2	15	1	11	1	1	433	1300	99	99	2	N0	0	MD						0	3
0	1	99	64	1	73	175	23.84	99	99	11	2	9	1	11	1	99	299	0	99	1	0	N0	0	PD						0	0
0	1	1	39	1	72	175	23.51	99	99	11	2	13	1	2	1	99	350	300	99	1	0	N0	0	WD	A	2	8	1	2008-06-24	2	0
0	1	1	73	1	55.6	160	21.72	99	1	2	2	49	1	2	99	99	313	100	1	99	1	N0	0	WD						0	2
0	1	99	42	2	39	155	16.23	99	1	11	2	29	1	2	1	99	185	0	99	99	1	N0	0	WD						0	2
0	1	1	74	1	66	163	24.84	99	99	2	11	10	1	3	99	99	295	80	99	99	2	N0	0	MD						0	3
0	1	99	74	1	64	170	22.15	99	99	2	11	6	1	11	99	1	267	120	99	99	3	N1	1	WD						0	3
0	1	99	50	2	69	165	25.34	99	1	2	2	12	1	3	1	99	217	100	99	1	3	N1	1	MD	C	1	2	1	2008-05-04	1	3
0	1	99	65	1	60.8	169	21.29	99	99	2	2	6	1	3	99	99	147	50	99	99	2	N0	0	WD						0	3
0	1	1	63	1	55.8	162	21.26	99	99	11	3	6	1	2	99	99	122	0	99	99	2	N0	0	WD						0	3
0	1	99	64	1	53.7	167	19.25	99	99	2	3	21	1	11	99	1	170	750	99	1	2	N0	0	WD						0	3
0	1	1	66	1	50	164	18.59	99	99	2	3	18	1	11	1	99	230	600	99	99	3	N1	3	MD						0	4
0	1	1	62	1	72.5	168	25.69	99	99	2	2	9	1	2	99	99	316	0	99	99	1	N0	0	WD						0	1
0	1	99	79	1	56	155	23.31	99	99	11	2	9	1	2	99	99	308	0	99	99	3	N2	5	Mucinous						0	3
0	1	99	73	2	60	154	25.3	1	99	2	2	38	1	2	99	99	204	0	99	99	3	N1	1	MD	C	2	8	1	2008-06-12	1	3
0	1	1	63	1	50	166	17.93	99	99	11	2	10	1	2	99	99	340	400	99	99	3	N2	5	MD						0	3
0	1	99	31	1	61.4	169	21.5	99	1	11	2	32	1	11	1	99	387	650	99	99	3	N1	3	MD	C	1	5	1	2008-06-21	1	4
0	1	1	45	1	70	173	23.39	99	1	11	2	16	1	11	99	99	222	550	99	99	2	N0	0	MD						0	3
0	1	99	74	2	60	160	23.44	99	99	2	2	14	1	2	99	99	401	200	99	99	1	N0	0	MD						0	2
0	1	1	37	1	86	173	28.73	99	99	2	2	13	1	11	99	1	340	250	99	99	1	N0	0	MD						0	1
0	1	99	71	2	67	165	24.61	99	99	2	11	10	1	2	99	99	195	0	99	99	3	N1	2	MD						0	3
0	1	99	52	1	66.6	167	23.88	1	99	2	11	10	1	11	99	99	192	0	99	99	2	N0	0	WD						0	3
0	1	99	67	1	63	168	22.32	99	99	11	2	10	1	2	1	99	255	0	99	99	3	N1	1	MD						0	1
0	1	1	58	1	76	176	24.54	99	1	11	2	9	1	11	1	99	351	550	99	99	1	N0	0	WD						0	1
0	1	99	55	1	75	161	28.93	99	99	2	2	10	1	2	1	99	320	0	99	99	2	N0	0	MD						0	3
0	1	99	38	2	58	168	20.55	99	99	11	2	10	1	11	99	1	265	50	99	99	4	N2	4	MD						0	3
0	1	1	66	1	56.9	167	20.4	99	99	11	2	53	1	2	99	99	390	350	99	99	1	N0	0	MD	C	1	4	1	2008-06-30	1	2
0	1	99	63	1	55	167	19.72	99	99	2	2	10	1	2	1	99	257	220	99	99	3	N2	5	MD						0	3
0	1	1	52	2	45	162	17.15	99	1	11	2	9	1	11	99	99	373	1300	1	99	1	N0	0	MD						0	2
0	1	99	70	2	43	148	19.37	99	99	11	3	17	1	11	99	99	268	100	99	1	2	N0	0	MD						0	3
0	1	1	66	1	56.7	161	21.87	1	99	2	2	11	1	11	99	99	175	0	99	99	3	N2	5	MD						0	3
0	1	1	60	1	71	164	26.4	99	99	2	2	9	1	2	99	99	255	0	99	99	2	N0	0	MD						0	3
0	1	99	60	2	61.8	156	25.39	99	1	2	2	20	1	3	99	99	434	0	99	99	3	N1	1	MD						0	1
0	1	99	53	2	68	146	31.9	99	99	2	11	9	1	3	99	99	357	0	99	99	1	N0	0	MD						0	2
0	1	99	49	2	48	157	19.47	99	99	11	11	7	1	3	99	99	364	0	99	99	2	N0	0	PD						0	3
0	1	99	78	1	67	164	24.91	1	99	2	2	11	1	11	1	99	293	200	99	99	2	N0	0	MD						0	3
0	1	1	62	1	54.4	160	21.25	99	99	11	11	9	1	2	99	99	330	0	99	99	2	N0	0	MD						0	3
0	1	99	82	1	70	170	24.22	99	99	2	2	6	1	3	99	99	460	500	99	99	3	N1	3	MD						0	2
0	1	99	59	1	64	162	24.39	99	99	11	2	9	1	3	99	99	216	100	99	99	3	N1	1	MD						0	2
0	1	1	66	1	50.9	160	19.88	99	99	2	2	8	1	11	99	1	548	3050	99	99	4	N0	0	MD						0	3
0	1	1	61	1	60.7	169	21.25	99	99	11	2	8	1	3	99	99	298	0	99	99	3	N2	4	MD						0	4
0	1	1	56	1	73	173	24.39	99	99	11	2	9	1	11	99	99	289	600	1	99	3	N2	14	PD						0	4
0	1	99	56	1	68.3	168	23.91	99	99	11	2	9	1	3	99	99	348	100	99	1	3	N2	7	MD						0	3
0	1	99	71	1	81	170	28.03	99	99	2	3	6	1	3	99	99	180	100	99	99	1	N0	0	MD						0	2
0	1	99	70	1	56	159	22.15	99	99	11	2	5	1	2	99	99	110	0	99	99	4	N0	0	MD						0	3
0	1	99	74	1	59.5	167	21.33	99	1	2	11	7	1	2	99	99	261	250	99	99	1	N0	0	MD						0	2
0	1	1	44	1	77.3	165	28.39	99	99	2	11	10	1	3	99	99	570	300	99	99	3	N1	2	MD						0	2
0	1	99	75	2	50	150	22.22	1	99	2	11	9	1	2	99	99	292	330	99	99	2	N0	0	MD						0	3
0	1	1	55	1	64	168	22.68	1	99	2	2	32	1	2	99	99	230	0	99	99	3	N1	2	MD	C	1	2	1	2008-07-24	1	3
0	1	1	56	1	58	164	21.56	99	99	11	2	22	1	11	1	99	400	400	99	1	4	N1	1	MD						0	3
0	1	99	30	2	62	161	23.92	99	99	11	2	9	1	2	1	99	265	0	99	99	1	N0	0	MD						0	2
0	1	99	57	2	56	153	23.92	99	99	2	2	12	1	3	99	99	158	100	99	99	4	N2	45	PD						0	3
0	1	99	75	2	47	148	21.46	99	99	11	2	9	1	2	99	99	270	0	99	99	3	N1	3	MD						0	3
0	1	99	55	1	67.5	170	23.36	99	99	11	11	8	1	2	99	99	182	0	99	99	1	N0	0	WD						0	2
0	1	99	62	1	70	173	23.39	99	99	2	11	9	1	2	99	99	310	510	99	99	2	N0	0	WD						0	3
0	1	1	48	1	62.4	162	23.81	99	99	11	2	9	1	2	99	99	296	0	99	99	1	N0	0	WD						0	1
0	1	99	81	2	37	145	17.6	99	99	2	3	18	1	3	99	99	150	0	99	99	2	N0	0	MD	C	1	2	1	2008-07-09	1	3
0	1	99	40	1	57	167	20.44	99	99	11	2	8	1	3	99	99	131	0	99	99	3	N1	1	MD						0	3
0	1	1	46	2	53	160	20.7	99	99	11	11	6	1	2	99	99	107	0	99	99	1	N0	0	WD						0	1
0	1	99	69	1	71	165	26.08	99	99	2	11	7	1	3	99	99	176	0	99	99	3	N2	6	MD						0	3
0	1	99	72	1	60.4	161	23.34	99	99	11	2	12	1	2	99	99	158	0	99	99	3	N2	20	MD						0	3
0	1	1	69	1	43	161	16.59	99	1	11	2	7	1	3	99	99	132	0	99	99	2	N0	0	MD						0	3
0	1	1	51	1	62	157	25.15	99	99	2	11	8	1	2	99	99	94	0	99	99	1	N0	0	WD						0	1
0	1	99	61	1	86	173	28.73	99	99	2	11	6	1	2	99	99	131	0	99	99	1	N0	0	WD						0	1
0	1	99	45	2	50	162	19.05	99	99	11	2	6	1	3	99	99	165	0	99	99	2	N0	0	WD						0	4
0	1	1	65	1	75	179	23.41	99	99	11	2	18	1	2	99	99	364	0	99	99	1	N0	0	MD	C	1	5	1	2008-09-23	1	1
0	1	1	55	1	65	172	21.97	99	99	11	2	9	1	3	99	99	379	300	99	99	2	N0	0	WD						0	3
0	1	1	56	1	67.7	166	24.57	99	99	11	11	10	1	11	99	99	176	50	99	99	3	N2	4	Mucinous						0	4
0	1	99	66	1	52	159	20.57	99	99	11	11	19	1	11	99	99	244	0	99	99	2	N0	0	MD						0	3
0	1	99	48	2	68.9	163	25.93	99	99	2	11	8	1	2	99	99	252	300	99	99	3	N1	3	MD						0	1
0	1	99	70	2	67	158	26.84	99	99	2	11	7	1	2	99	99	317	50	99	99	2	N0	0	MD						0	3
0	1	1	60	1	52.9	168	18.74	99	99	11	2	19	1	11	99	99	392	150	99	99	1	N0	0	WD						0	2
0	1	99	64	2	57	156	23.42	99	99	11	11	8	1	3	99	99	174	700	99	99	3	N2	8	MD						0	3
0	1	99	59	2	56	152	24.24	99	99	2	2	7	1	2	99	99	102	0	99	99	2	N0	0	MD						0	3
0	1	99	62	2	55	151	24.12	99	99	11	11	5	1	2	99	99	138	0	99	99	2	N0	0	MD						0	3
0	1	99	68	2	42.8	146	20.08	99	99	2	11	10	1	11	99	99	319	300	99	1	3	N2	6	MD						0	3
0	1	1	59	1	66	166	23.95	1	99	2	2	10	1	3	1	99	405	0	99	1	3	N1	1	MD						0	3
0	1	99	38	1	61	165	22.41	99	1	11	2	25	1	3	99	99	459	230	99	99	1	N0	0	WD	C	1	7	1	2008-09-26	0	2
0	1	99	61	1	60	160	23.44	99	1	11	2	23	1	11	1	99	259	320	99	1	3	N2	5	MD						0	2
0	1	1	61	1	64	163	24.09	99	99	11	2	8	1	3	1	99	407	20	99	99	3	N1	2	MD						0	3
0	1	99	26	2	64	170	22.15	99	99	11	2	6	1	3	99	99	546	30	99	99	3	N1	3	MD						0	3
0	1	99	29	2	54	158	21.63	99	1	11	2	7	1	2	99	99	68	0	99	99	3	N1	1	MD						0	2
0	1	99	64	1	69.2	170	23.94	99	99	11	11	7	1	3	99	99	127	0	99	99	1	N0	0	MD						0	2
0	1	99	60	2	58	156	23.83	99	99	2	2	9	1	2	99	99	301	0	99	99	1	N0	0	MD						0	2
0	1	99	73	2	58	158	23.23	1	99	2	3	12	1	3	99	99	153	100	99	1	1	N0	0	MD						0	2
0	1	99	72	2	61	160	23.83	99	99	3	2	5	1	3	99	99	161	0	99	99	1	N0	0	MD						0	1
0	1	99	52	1	67.3	180	20.77	99	99	11	2	15	1	11	1	99	451	550	99	99	4	N2	21	MD						0	4
0	1	99	73	1	69.4	172	23.46	99	99	11	11	25	1	11	1	99	682	4100	99	1	2	N0	0	MD						0	3
0	1	99	43	1	78.6	168	27.85	99	99	2	11	4	1	3	99	99	354	400	99	99	2	N0	0	MD						0	3
0	1	1	57	1	53	155	22.06	99	99	11	2	11	1	2	99	99	188	500	99	99	2	N0	0	MD						0	4
0	1	1	58	1	57	172	19.27	99	99	2	2	16	1	3	1	99	312	150	99	99	4	N0	0	MD						0	3
0	1	99	58	2	62.5	157	25.36	99	99	2	3	6	1	3	99	99	158	50	99	99	3	N1	1	MD						0	2
0	1	99	50	2	52.9	158	21.19	99	99	11	2	7	1	3	99	99	125	0	99	99	2	N0	0	WD						0	3
0	1	99	64	1	74	169	25.91	99	99	3	11	9	1	3	99	99	147	150	99	99	1	N0	0	MD						0	2
0	1	1	60	1	68	174	22.46	99	99	11	2	11	1	2	99	99	370	1250	99	1	3	N1	1	MD						0	2
0	1	99	60	1	68	167	24.38	99	99	2	3	10	1	2	1	99	345	500	99	1	1	N0	0	WD						0	2
0	1	1	76	1	53	165	19.47	99	99	11	2	26	1	11	99	99	242	300	99	1	1	N0	0	MD						0	2
0	1	1	57	2	80	145	38.05	99	99	2	2	13	1	2	99	99	211	250	99	99	2	N0	0	MD						0	3
0	1	99	58	1	65	165	23.88	99	99	2	2	10	1	11	99	99	354	850	99	99	4	N1	2	MD						0	3
0	1	99	43	2	56	151	24.56	99	99	11	3	18	1	11	99	99	239	500	99	99	3	N1	3	MD						0	2
0	1	99	82	2	56	155	23.31	99	99	2	2	18	1	11	99	99	418	800	99	99	4	N2	41	MD						0	3
0	1	1	73	1	70.6	158	28.28	99	99	2	11	20	1	11	99	99	644	950	1	99	4	N2	13	MD						0	4
0	1	99	75	1	74.5	169	26.08	1	1	2	3	17	1	3	99	99	505	500	99	1	4	N0	0	MD						0	3
0	1	99	62	2	61.6	158	24.68	99	99	3	2	9	1	3	99	99	145	100	99	99	3	N1	3	MD	C	6	40	2	2008-12-22	2	3
0	1	99	43	2	45.6	152	19.74	99	99	11	11	6	1	3	99	99	137	100	99	99	3	N2	8	MD						0	3
0	1	99	75	1	57	172	19.27	99	99	11	2	5	1	3	99	99	165	50	99	99	2	N0	0	Mucinous						0	3
0	1	99	70	2	60.9	158	24.09	99	99	2	3	24	1	2	1	99	368	300	99	99	4	N2	7	MD						0	3
0	1	99	60	2	58	158	23.23	99	1	11	2	23	1	3	99	99	417	800	99	99	1	N0	0	MD						0	1
0	1	99	65	1	67.5	165	24.79	99	99	3	11	15	1	11	99	99	226	100	99	99	4	N2	5	MD						0	3
0	1	99	50	2	41	148	18.72	99	99	11	3	5	1	3	99	99	372	0	99	99	1	N0	0	MD						0	2
0	1	99	77	2	46	145	21.88	1	99	2	2	11	1	2	99	99	325	0	99	99	3	N1	1	MD						0	3
0	1	1	37	1	57.9	166	21.01	99	99	11	2	18	1	2	99	99	327	350	99	1	2	N0	0	Mucinous						0	3
0	1	1	56	1	74.1	175	24.2	99	99	11	2	20	1	11	99	99	260	300	99	99	4	N2	21	MD						0	3
0	1	1	75	1	55	176	17.76	99	99	2	2	33	1	11	1	99	540	3000	99	99	2	N0	0	MD	B	3	15	1	2008-12-17	2	3
0	1	1	55	1	61.6	168	21.83	99	99	11	2	17	1	3	99	1	572	200	99	99	4	N1	3	MD	C	1	7	1	2008-12-15	1	3
0	1	99	73	2	56	138	29.41	99	99	2	11	5	1	3	99	99	196	100	99	1	2	N0	0	MD						0	3
0	1	99	75	2	52	155	21.64	99	99	11	2	6	1	3	99	99	174	0	99	99	1	N0	0	MD						0	2
0	1	1	33	1	74	180	22.84	99	99	11	2	26	1	3	99	99	176	0	99	99	2	N0	0	MD	C	1	2	1	2008-12-10	1	3
0	1	99	70	1	69	167	24.74	99	99	11	11	12	1	2	99	99	325	350	99	99	4	N2	14	PD						0	3
0	1	99	48	2	61	168	21.61	99	99	11	11	5	1	3	99	99	252	100	99	99	1	N0	0	WD						0	1
0	1	99	74	2	42.5	151	18.64	99	99	11	2	6	1	3	99	99	165	0	99	99	2	N0	0	MD						0	3
0	1	1	62	1	90	173	30.07	1	99	2	2	27	1	2	99	99	318	0	99	99	2	N0	0	MD	C	1	4	1	2008-12-26	0	3
0	1	99	75	1	61	166	22.14	1	99	2	11	9	1	2	99	99	298	200	99	99	2	N0	0	MD						0	3
0	1	99	56	1	55	167	19.72	1	1	2	2	15	1	11	99	99	185	0	99	99	3	N2	4	WD						0	3
0	1	99	66	1	62	160	24.22	1	99	2	11	12	1	2	99	99	210	200	99	99	3	N2	7	MD						0	3
0	1	99	73	1	54.6	172	18.46	1	99	2	2	11	1	11	1	99	224	0	99	99	2	N0	0	MD						0	3
0	1	99	69	2	64.8	154	27.32	99	99	2	2	11	1	11	99	99	191	200	99	99	3	N1	2	MD						0	1
0	1	99	38	2	70	160	27.34	99	99	2	11	8	1	2	99	99	290	0	99	99	3	N2	13	MD						0	3
0	1	99	52	1	85	175	27.76	99	99	2	2	8	1	3	1	99	447	530	99	99	2	N0	0	MD						0	3
0	1	99	48	2	47	147	21.75	99	99	11	11	6	1	2	99	99	206	200	99	99	1	N0	0	MD						0	1
0	1	1	52	1	82	176	26.47	99	99	2	2	6	1	3	99	99	173	150	99	99	1	N0	0	WD						0	1
0	1	99	62	1	80	178	25.25	99	1	2	2	70	1	11	99	99	253	100	99	99	3	N1	1	MD	C	2	13	1	2008-12-10	2	4
0	1	99	57	1	52	157	21.1	99	99	2	11	62	1	11	99	99	421	1000	99	1	4	N0	0	MD						0	3
0	1	99	64	2	43	147	19.9	99	99	2	11	34	1	2	99	99	354	0	99	99	2	N0	0	MD	C	1	3	1	2009-01-16	1	4
0	1	1	66	1	65	160	25.39	99	99	2	2	9	1	3	1	99	491	550	99	99	2	N0	0	MD						0	3
0	1	1	51	1	85	170	29.41	99	99	2	11	16	1	2	99	99	331	0	99	99	3	N1	1	MD	C	1	3	1	2009-02-01	1	3
0	1	99	72	1	62	156	25.15	99	99	2	2	12	1	11	99	99	345	130	1	99	1	N0	0	WD						0	2
0	1	1	71	1	48	160	18.75	99	99	2	11	12	1	2	99	99	104	0	99	99	1	N0	0	MD						0	1
0	1	99	61	1	72	165	26.45	99	99	2	2	12	1	2	1	99	319	0	99	99	3	N1	3	MD						0	3
0	1	1	72	1	52	170	17.99	99	99	11	11	10	1	2	99	99	157	50	99	99	3	N1	1	MD						0	2
0	1	99	67	2	60	161	23.15	99	99	2	11	15	1	11	99	99	146	130	99	99	2	N0	0	MD						0	4
0	1	99	58	1	67	164	24.91	99	99	3	2	12	1	11	99	99	346	350	99	99	4	N0	0	MD						0	3
0	1	99	66	2	53	150	23.56	99	99	2	11	9	1	3	99	99	367	250	99	99	3	N1	1	MD						0	3
0	1	1	56	2	69	159	27.29	99	1	2	2	13	1	11	99	99	267	100	99	99	3	N1	1	MD						0	3
0	1	1	61	1	63	170	21.8	99	99	2	2	17	1	11	99	99	171	0	99	99	3	N2	12	MD						0	3
0	1	99	66	2	53	159	20.96	1	99	2	2	13	1	2	1	99	249	0	99	99	1	N0	0	MD						0	1
0	1	1	67	1	66.2	160	25.86	1	99	2	2	5	1	2	99	99	204	0	99	99	3	N2	6	MD						0	3
0	1	99	67	2	55	154	23.19	99	99	11	11	12	1	3	99	99	267	600	99	99	2	N0	0	MD						0	3
0	1	1	50	1	70	163	26.35	99	99	2	2	15	1	3	99	99	222	0	99	99	1	N0	0	MD	C	1	3	1	2008-12-08	1	2
0	1	99	55	1	63.5	167	22.77	1	99	2	2	10	1	11	99	99	160	80	99	99	3	N2	33	Mucinous						0	4
0	1	99	65	1	75	175	24.49	99	99	2	2	8	1	2	99	99	250	0	99	99	1	N0	0	MD						0	2
0	1	99	67	1	65	168	23.03	99	99	11	2	29	1	11	1	99	556	1000	99	1	4	N0	0	MD						0	2
0	1	99	42	1	67.3	172	22.75	99	99	11	11	15	1	11	99	99	251	400	99	1	3	N1	2	MD						0	3
0	1	99	64	2	58	154	24.46	99	99	11	2	6	1	2	99	99	193	0	99	99	1	N0	0	MD						0	2
0	1	99	71	2	52	150	23.11	99	99	11	2	11	1	2	99	99	243	0	99	99	3	N1	2	MD						0	3
0	1	1	56	1	46	163	17.31	99	99	11	3	35	1	2	1	99	359	0	99	99	3	N2	5	MD						0	3
0	1	1	45	1	69	164	25.65	99	99	2	11	10	1	3	99	99	308	20	99	99	1	N0	0	MD						0	2
0	1	1	55	1	58	168	20.55	99	99	11	2	8	1	3	99	99	445	100	99	1	3	N1	2	PD						0	3
0	1	99	51	1	65.6	177	20.97	99	99	11	3	9	1	3	99	99	314	0	99	1	2	N0	0	MD						0	3
0	1	99	74	1	71	168	25.16	99	99	2	2	14	1	2	99	99	289	80	99	99	3	N1	1	MD						0	2
0	1	1	78	1	80.6	178	25.44	1	99	3	3	7	1	3	99	99	358	80	99	99	2	N0	0	MD						0	3
0	1	1	54	1	68	170	23.53	99	99	11	2	44	1	2	99	99	179	200	99	99	3	N1	1	MD	C	1	5	1	2009-02-24	1	3
0	1	1	55	1	66.8	177	21.32	99	99	11	2	37	1	3	1	99	590	500	99	99	2	N0	0	MD						0	3
0	1	99	65	2	64.1	162	24.42	1	1	2	2	32	1	2	99	99	467	1150	99	99	1	N0	0	MD						0	2
0	1	99	60	1	77	180	23.77	1	99	2	2	15	1	2	99	99	265	0	99	99	3	N1	1	WD	C	1	3	1	2009-04-02	1	3
0	1	99	67	2	51	150	22.67	99	99	2	3	14	1	3	99	99	243	300	99	99	2	N0	0	MD						0	3
0	1	1	68	1	63	168	22.32	99	99	2	2	8	1	2	99	99	191	230	99	99	3	N1	1	MD						0	3
0	1	99	42	2	53	149	23.87	99	99	11	11	14	1	11	99	99	378	1050	99	99	1	N0	0	MD						0	1
0	1	1	68	1	62	160	24.22	99	99	3	2	11	1	2	99	99	226	200	99	99	2	N0	0	MD						0	3
0	1	99	74	2	66.4	150	29.51	99	99	2	11	11	1	11	99	99	149	100	99	99	3	N1	1	MD						0	3
0	1	99	72	1	71	167	25.46	99	99	2	2	9	1	11	99	99	225	100	99	99	3	N2	5	MD						0	3
0	1	99	71	1	79	170	27.34	1	99	2	2	9	1	2	1	99	311	0	99	99	1	N0	0	MD						0	1
0	1	1	44	1	68	175	22.2	99	99	2	2	22	1	3	99	99	330	110	99	99	3	N2	4	MD	C	1	4	1	2009-04-18	1	3
0	1	99	57	2	82	163	30.86	99	99	2	2	11	1	2	99	99	234	0	99	99	2	N0	0	PD						0	3
0	1	1	60	1	65	171	22.23	1	99	2	2	9	1	2	99	99	209	0	99	99	3	N1	2	MD						0	2
0	1	99	67	1	72	176	23.24	99	99	11	11	10	1	11	99	99	154	150	99	99	3	N1	1	MD						0	3
0	1	1	69	1	64	160	25	99	99	11	11	8	1	11	99	99	221	0	99	99	3	N2	6	MD						0	3
0	1	99	74	1	52	169	18.21	1	99	2	2	9	1	3	1	99	421	300	99	1	3	N1	1	MD						0	2
0	1	99	61	2	80	163	30.11	99	1	2	2	5	1	2	99	99	261	0	99	99	2	N0	0	MD						0	3
0	1	1	73	1	60	163	22.58	99	99	11	2	8	1	2	99	99	262	100	99	99	1	N0	0	MD						0	1
0	1	99	59	2	62	161	23.92	99	99	11	2	9	1	3	99	99	338	90	99	99	1	N0	0	WD						0	2
0	1	1	60	1	80.8	178	25.5	99	99	2	2	11	1	2	1	99	371	0	99	1	2	N0	0	MD						0	3
0	1	99	50	1	58	166	21.05	1	99	2	11	10	1	2	1	99	216	0	99	99	1	N0	0	MD						0	1
0	1	99	69	1	56.7	164	21.08	1	1	2	2	14	1	11	99	99	218	0	99	99	3	N1	3	MD						0	3
0	1	99	56	2	53	150	23.56	99	99	11	2	8	1	2	99	99	178	50	99	99	2	N0	0	MD						0	3
0	1	1	54	1	72.4	171	24.79	99	99	11	2	8	1	2	99	99	226	30	99	99	1	N0	0	MD						0	2
0	1	99	26	2	55.1	158	22.07	99	99	11	3	10	1	3	99	99	320	50	99	99	1	N0	0	MD						0	2
0	1	99	53	2	62	162	23.62	99	99	2	3	15	1	2	99	99	243	0	99	99	2	N0	0	MD						0	3
0	1	1	60	1	80	175	26.12	1	99	2	3	10	1	3	99	99	430	100	99	99	1	N0	0	MD						0	1
0	1	99	74	1	70	166	25.4	99	99	2	2	8	1	3	99	99	497	0	99	99	1	N0	0	MD						0	1
0	1	99	80	2	52	150	23.11	99	99	11	2	8	1	2	99	99	217	50	99	99	2	N0	0	MD						0	3
0	1	1	66	1	68	160	26.56	99	99	2	2	7	1	2	99	99	194	0	99	99	1	N0	0	WD						0	1
0	1	99	63	2	69	162	26.29	99	99	2	2	8	1	3	99	99	282	50	99	99	2	N0	0	MD						0	3
0	1	1	66	1	51	160	19.92	99	99	11	11	19	1	11	99	99	292	200	99	99	3	N1	1	MD						0	3
0	1	99	59	2	52	151	22.81	99	99	11	2	12	1	3	1	99	251	400	99	99	2	N0	0	MD						0	3
0	1	99	69	1	66	168	23.38	1	99	2	11	10	1	2	99	99	282	0	99	99	2	N0	0	MD						0	3
0	1	99	72	2	43.5	146	20.41	99	1	2	11	10	1	2	99	99	198	200	99	99	2	N0	0	MD						0	3
0	1	1	61	2	67	162	25.53	1	99	2	2	10	1	2	99	99	309	200	99	1	3	N1	3	PD						0	3
0	1	1	79	1	72	167	25.82	99	99	2	3	10	1	3	99	99	373	350	99	1	1	N0	0	MD						0	2
0	1	99	47	2	62	161	23.92	99	99	11	2	8	1	3	99	99	343	50	99	99	3	N1	1	WD						0	1
0	1	1	51	1	78.5	172	26.53	99	99	2	2	12	1	11	99	99	236	200	99	99	3	N1	1	MD						0	3
0	1	99	55	2	51	158	20.43	99	1	11	2	11	1	2	99	99	207	250	99	99	2	N0	0	MD						0	3
0	1	99	56	1	75	170	25.95	99	99	2	2	11	1	11	99	99	120	0	99	99	2	N0	0	MD						0	3
0	1	99	82	2	66.2	160	25.54	99	99	2	11	12	1	11	99	99	235	6300	99	99	2	N0	0	MD						0	3
0	1	1	53	1	103	182	31.1	99	99	2	11	29	1	11	99	99	497	200	99	99	3	N1	2	MD						0	3
0	1	99	72	2	43.7	148	19.95	99	99	2	11	16	1	11	99	99	390	800	99	99	1	N0	0	WD						0	1
0	1	99	74	1	66.7	161	25.73	1	99	2	2	13	1	11	99	99	150	0	99	99	3	N1	1	MD						0	3
0	1	99	58	2	57	155	23.73	99	99	2	2	8	1	3	99	99	344	270	99	99	1	N0	0	WD						0	1
0	1	99	70	2	50	153	21.36	1	99	2	2	7	1	2	99	99	205	0	99	99	2	N0	0	MD						0	3
0	1	99	45	2	52	158	20.83	99	99	11	11	7	1	3	99	99	311	50	99	99	1	N0	0	MD						0	2
0	1	99	59	1	75	180	23.15	1	99	2	11	7	1	2	99	99	225	50	99	99	1	N0	0	MD						0	1
0	1	1	56	1	94	164	34.95	1	1	2	2	12	1	2	99	99	391	130	99	99	3	N2	5	MD	C	1	3	1	2009-06-22	1	3
0	1	99	67	2	49	153	20.93	99	99	11	3	8	1	3	99	99	391	200	99	1	0	N0	0	WD						0	0
0	1	99	56	1	53.6	170	18.55	99	99	11	3	49	1	11	99	99	427	1000	99	1	2	N0	0	WD	C	1	5	1	2009-06-15	1	4
0	1	1	75	1	65.4	154	27.58	99	99	2	2	9	1	2	1	99	329	250	99	1	1	N0	0	MD						0	1
0	1	99	67	1	55	165	20.2	1	99	2	2	7	1	2	99	99	241	0	99	99	1	N0	0	MD						0	2
0	1	1	68	1	57	160	22.27	99	99	11	2	8	1	2	1	99	342	150	99	99	1	N0	0	WD						0	1
0	1	99	64	1	48	160	18.75	99	99	11	2	7	1	3	99	99	273	20	99	99	1	N0	0	MD						0	2
0	1	99	61	2	65	155	27.06	99	99	2	11	15	1	11	99	99	397	520	99	99	4	N0	0	WD						0	1
0	1	99	75	2	44	147	20.36	1	99	2	2	10	1	11	99	99	161	350	99	99	3	N1	1	MD						0	3
0	1	1	43	1	60	160	23.44	99	99	11	3	9	1	3	99	99	471	190	99	1	3	N1	3	MD						0	3
0	1	1	67	1	56.8	165	20.86	99	99	11	2	9	1	11	1	99	356	200	99	1	4	N0	0	MD						0	3
0	1	1	55	1	55	175	17.96	99	99	11	2	13	1	11	99	99	209	50	99	99	1	N0	0	WD	C	1	3	1	2009-07-05	0	2
0	1	99	66	1	72	168	25.51	99	99	2	2	12	1	11	1	99	219	0	99	99	3	N2	6	WD						0	3
0	1	1	76	1	58	158	23.23	99	99	2	2	42	1	3	99	99	398	100	99	99	2	N0	0	WD	C	1	6	1	2009-07-19	1	3
0	1	99	71	2	68.6	151	30.09	1	99	2	2	16	1	2	99	99	216	0	99	99	1	N0	0	MD						0	2
0	1	99	55	2	59.5	154	24.77	99	99	11	2	10	1	3	1	99	345	0	99	99	2	N0	0	WD						0	3
0	1	99	60	1	51.5	167	18.47	99	99	11	2	10	1	11	99	99	211	400	99	99	2	N0	0	MD						0	3
0	1	99	59	2	63	158	25.24	99	99	2	11	7	1	2	99	99	206	200	99	99	3	N1	1	MD						0	2
0	1	1	51	2	53.5	160	20.64	99	99	11	2	11	1	3	99	99	450	0	99	99	2	N0	0	MD						0	3
0	1	99	69	2	60	157	24.34	99	99	2	2	8	1	3	99	99	291	0	99	99	2	N0	0	WD						0	3
0	1	99	64	1	72.3	176	23.08	99	99	2	2	6	1	3	99	99	423	100	99	99	1	N0	0	MD						0	1
0	1	99	74	1	52	157	21.1	1	99	2	2	12	1	3	99	99	461	300	99	99	2	N0	0	MD						0	3
0	1	99	78	2	46	144	22.18	99	99	11	2	7	1	2	99	99	242	130	99	99	2	N0	0	MD						0	3
0	1	99	45	1	67	167	24.02	99	99	11	2	8	1	2	99	99	222	0	99	99	1	N0	0	WD						0	1
0	1	1	64	2	54	158	21.63	1	1	2	2	12	1	11	99	99	156	50	99	99	2	N0	0	MD						0	3
0	1	99	68	1	51.5	160	20.12	99	1	11	2	9	1	2	99	99	398	280	99	99	2	N0	0	MD						0	3
0	1	1	52	1	71	167	25.46	99	1	2	2	13	1	3	1	99	490	510	99	99	2	N0	0	MD						0	3
0	1	1	66	1	72	176	23.24	1	99	2	11	12	1	2	99	99	169	50	99	99	2	N0	0	MD						0	3
0	1	1	54	2	45.3	154	19.1	99	99	11	11	12	1	11	99	99	232	100	99	99	3	N1	1	MD						0	3
0	1	99	65	1	58.8	168	20.83	99	99	11	2	17	1	11	1	99	227	50	99	1	0	N0	0	MD	B	7	44	2	2009-10-07	2	0
0	1	1	38	1	67	177	21.39	99	99	11	2	8	1	3	1	99	377	500	99	1	3	N2	5	MD						0	3
0	1	1	41	2	53	161	20.45	99	99	11	3	12	1	11	99	99	198	50	99	1	1	N0	0	MD						0	2
0	1	99	74	2	57.2	145	27.21	99	99	2	2	7	1	3	99	99	288	0	99	1	2	N0	0	MD						0	3
0	1	99	42	2	53	160	20.7	99	99	11	11	23	1	3	99	99	325	220	99	99	2	N0	0	MD	C	1	5	1	2009-05-25	1	3
0	1	1	54	1	60	170	20.52	99	99	11	2	17	1	2	99	99	396	500	99	1	3	N1	1	MD	C	2	13	1	2009-08-23	2	3
0	1	99	62	2	70	163	26.35	99	99	2	2	8	1	2	99	99	266	150	99	99	1	N0	0	MD						0	1
0	1	99	63	2	50	165	18.37	99	1	11	2	8	1	3	99	99	445	50	99	99	1	N0	0	MD						0	2
0	1	99	52	2	56	158	22.43	99	99	2	11	6	1	3	99	99	302	100	99	99	1	N0	0	WD						0	1
0	1	99	57	1	64	170	22.15	1	99	2	2	13	1	2	99	99	232	0	99	99	1	N0	0	MD						0	1
0	1	99	38	1	71.8	173	23.99	99	99	11	2	14	1	3	99	99	285	100	99	99	3	N1	3	MD						0	2
0	1	1	67	1	73	172	24.68	1	99	2	11	10	1	2	99	99	191	200	99	99	3	N1	2	MD						0	4
0	1	1	78	1	62.5	162	23.81	99	1	2	2	23	1	3	1	99	450	470	99	99	1	N0	0	MD						0	1
0	1	1	65	1	65	166	23.31	99	99	11	3	39	1	11	1	99	605	1670	99	99	4	N1	1	WD						0	4
0	1	99	72	2	45	160	17.58	99	99	2	11	8	1	2	99	99	309	0	99	99	1	N0	0	MD						0	2
0	1	1	62	1	74	162	28.2	99	99	3	11	7	1	2	99	99	215	50	99	99	3	N1	2	MD						0	3
0	1	99	62	2	58	151	25.44	99	99	2	2	5	1	3	99	99	310	0	99	99	2	N0	0	MD						0	3
0	1	1	65	1	61	160	23.83	99	99	3	3	11	1	11	1	99	266	800	99	99	4	N1	2	MD						0	4
0	1	1	64	1	63.6	163	23.94	99	99	2	3	8	1	2	1	1	311	1100	99	99	4	N1	1	MD						0	3
0	1	99	69	2	50	150	22.22	99	99	11	3	9	1	3	99	99	554	500	99	99	2	N0	0	WD						0	3
0	1	1	50	1	69.2	170	23.94	99	99	11	2	10	1	3	1	99	534	1230	99	1	0	N0	0	MD						0	0
0	1	99	86	2	53	158	20.96	99	99	3	2	8	1	3	99	99	274	150	99	99	1	N0	0	MD						0	1
0	1	99	71	2	59.1	151	25.92	99	99	2	11	7	1	2	1	99	170	0	99	99	3	N1	1	WD						0	3
0	1	1	63	1	51.5	168	18.25	99	99	11	3	15	1	3	99	99	205	200	99	99	3	N1	1	MD						0	3
0	1	99	65	1	60	168	21.26	99	99	11	2	13	1	11	1	99	343	250	99	99	1	N0	0	MD						0	2
0	1	99	73	1	63	168	22.32	99	99	11	2	9	1	2	99	99	252	100	99	99	3	N1	1	MD						0	3
0	1	99	59	2	65	154	27.41	1	99	2	2	22	1	2	99	99	275	100	99	99	3	N2	10	MD						0	3
0	1	1	67	1	61	166	22.14	1	99	2	2	17	1	11	99	99	163	200	99	99	3	N1	1	MD	C	1	6	1	2009-11-08	1	3
0	1	99	62	1	72.7	170	25.16	99	99	2	2	10	1	2	99	99	244	330	99	99	4	N2	6	MD						0	3
0	1	1	62	1	64	167	22.95	99	99	11	11	10	1	2	1	99	283	0	99	99	2	N0	0	WD						0	3
0	1	99	49	2	62	164	23.05	99	99	11	11	10	1	2	99	99	155	50	99	99	1	N0	0	MD						0	1
0	1	1	75	1	67	162	25.53	99	99	2	11	11	1	11	99	99	186	100	99	99	3	N1	2	MD						0	3
0	1	99	62	2	60	143	29.34	99	99	2	2	12	1	2	99	99	240	80	99	99	1	N0	0	MD						0	2
0	1	1	49	1	68	173	22.72	99	99	11	11	14	1	2	99	99	238	0	99	99	2	N0	0	MD						0	3
0	1	99	59	1	57	156	23.42	1	99	2	2	9	1	3	99	99	300	300	99	99	2	N0	0	MD						0	3
0	1	99	61	2	48	154	20.24	99	99	2	2	13	1	11	99	99	151	200	99	99	3	N1	2	MD						0	3
0	1	99	54	2	68	170	23.53	99	99	2	2	11	1	11	1	99	389	200	99	1	4	N2	12	MD						0	3
0	1	1	73	1	56	160	21.88	99	99	11	2	18	1	11	99	99	208	200	99	1	3	N2	6	MD	C	1	5	1	2009-09-19	1	3
0	1	99	71	2	58	150	25.78	99	1	2	2	11	1	2	99	99	304	0	99	99	3	N2	5	MD						0	2
0	1	1	61	1	68	166	24.68	99	99	11	2	13	1	11	99	99	493	450	99	1	4	N1	2	Mucinous						0	3
0	1	1	70	1	74.5	167	26.71	99	99	2	2	11	1	3	99	99	295	200	99	99	1	N0	0	MD						0	1
0	1	99	51	2	57	166	20.69	99	99	11	11	12	1	2	99	99	298	0	99	99	1	N0	0	WD						0	1
0	1	99	68	2	58	159	22.94	99	99	2	2	10	1	2	1	99	287	150	99	99	1	N0	0	MD						0	2
0	1	1	60	2	55.7	153	23.79	99	99	2	2	11	1	11	1	99	258	50	99	99	3	N1	1	MD						0	1
0	1	1	73	1	76.6	169	26.82	99	99	2	2	19	1	11	99	1	285	300	99	99	2	N0	0	MD	C	1	6	1	2009-10-04	1	3
0	1	99	67	2	50	149	22.52	99	99	2	3	8	1	2	99	99	206	50	99	99	3	N1	3	MD						0	2
0	1	99	75	2	54	149	24.32	99	99	11	2	9	1	11	99	99	189	0	99	99	2	N0	0	MD						0	3
0	1	99	57	1	69	173	23.05	99	99	11	3	20	1	11	1	99	660	1850	99	1	2	N0	0	MD						0	3
0	1	99	72	1	69	167	24.74	99	99	11	11	6	1	3	99	99	258	220	99	99	2	N0	0	MD						0	3
0	1	99	60	2	52	160	20.31	1	99	2	11	10	1	3	99	99	270	350	99	99	3	N1	1	MD						0	3
0	1	99	68	2	65	165	23.88	99	99	2	2	11	1	11	99	99	179	270	99	99	2	N0	0	MD						0	3
0	1	1	64	2	56	152	24.24	99	99	2	2	10	1	11	1	99	270	200	99	99	2	N0	0	MD						0	3
0	1	99	52	2	46	156	18.9	99	1	11	2	15	1	2	99	99	150	0	99	99	1	N0	0	WD						0	1
0	1	99	62	2	52	150	23.11	99	99	11	2	10	1	11	1	99	196	0	99	1	0	N0	0	MD						0	0
0	1	1	75	1	59.2	175	19.33	99	99	11	11	9	1	2	99	99	339	100	99	99	3	N1	1	MD						0	4
0	1	1	60	1	50.6	173	16.91	99	99	11	2	7	1	2	99	99	341	50	99	99	1	N0	0	WD						0	1
0	1	99	39	2	63	168	22.32	99	99	11	2	7	1	3	99	99	395	600	99	99	1	N0	0	WD						0	1
0	1	1	52	1	59	164	21.94	99	99	11	2	7	1	2	1	99	292	300	99	1	3	N1	3	MD						0	3
0	1	99	64	1	73.3	168	25.97	99	99	2	11	5	1	2	99	99	207	30	99	99	3	N1	2	MD						0	1
0	1	1	53	1	63	167	22.59	99	99	2	2	5	1	3	99	99	374	200	99	99	1	N0	0	MD						0	1
0	1	99	70	2	47	146	22.05	99	99	11	11	7	1	2	99	99	369	180	99	99	2	N0	0	MD						0	3
0	1	99	50	1	62	168	21.97	99	99	11	11	5	1	2	99	99	168	0	99	99	3	N1	3	MD						0	1
0	1	1	74	1	65	167	23.31	99	99	11	11	21	1	2	99	1	338	300	99	99	1	N0	0	WD						0	2
0	1	1	72	1	65	175	21.22	99	99	11	2	6	1	2	99	99	243	350	99	99	3	N1	3	MD	C	6	42	2	2009-11-06	2	3
0	1	99	50	2	48	157	19.47	99	99	11	11	19	1	11	99	99	586	2550	99	99	4	N1	3	MD						0	4
0	1	1	56	2	68.9	160	26.91	99	99	2	11	73	1	2	99	99	267	100	99	99	3	N1	2	MD	C	1	5	1	2009-10-17	1	3
0	1	1	70	2	58	144	27.97	1	99	2	2	10	1	11	99	1	239	150	99	99	2	N0	0	MD						0	3
0	1	1	44	1	67	161	25.85	99	99	2	2	12	1	3	1	99	473	1300	99	99	3	N2	4	MD						0	3
0	1	99	75	1	67	171	22.91	99	99	2	2	13	1	2	1	99	266	700	99	99	2	N0	0	MD						0	3
0	1	99	46	2	53	158	21.23	99	99	11	3	9	1	2	99	99	222	0	99	99	1	N0	0	MD						0	1
0	1	99	71	2	53.2	150	23.69	99	99	3	3	10	1	3	99	99	354	400	99	99	1	N0	0	MD						0	1
0	1	99	26	1	66	184	19.49	99	99	11	2	8	1	3	99	99	301	0	99	99	3	N1	2	MD						0	3
0	1	99	68	2	56	155	23.31	99	99	11	2	26	1	11	99	1	323	100	99	99	2	N0	0	MD						0	3
0	1	1	66	1	76.5	176	24.7	99	99	11	2	18	1	11	1	99	241	0	99	1	1	N0	0	WD						0	2
0	1	1	76	1	57	166	20.69	99	99	11	2	10	1	3	1	99	339	0	99	1	0	N0	0	MD						0	0
0	1	1	63	1	56	158	22.43	99	99	11	11	16	1	2	99	1	196	150	99	99	2	N0	0	MD						0	3
0	1	99	52	2	65	151	28.51	99	99	2	11	8	1	11	99	99	197	50	99	99	1	N0	0	WD						0	1
0	1	99	52	2	67	154	28.25	99	1	2	2	11	1	3	99	99	364	600	99	99	3	N2	14	MD	A	2	10	1	2009-12-31	2	3
0	1	1	69	2	35.6	143	17.41	99	99	2	3	7	1	3	99	99	326	400	99	1	3	N1	3	MD						0	3
0	1	1	72	1	68	172	22.99	1	99	2	2	8	1	2	99	99	210	0	99	99	3	N1	2	MD						0	1
0	1	99	60	2	50	155	20.81	99	1	11	2	7	1	2	99	99	261	150	99	99	2	N0	0	MD						0	3
0	1	99	71	2	45	141	22.63	99	99	11	2	6	1	2	99	99	166	0	99	99	2	N0	0	MD						0	3
0	1	1	64	1	59	165	21.67	1	99	2	3	25	1	2	1	99	391	150	99	1	4	N0	0	MD	B	2	8	1	2009-10-22	0	3
0	1	1	54	1	60	173	20.05	99	99	11	11	5	1	2	99	99	205	200	99	99	1	N0	0	MD						0	2
0	1	1	60	1	60.1	166	21.81	99	99	11	11	5	1	2	99	99	185	200	99	99	3	N2	9	MD						0	3
0	1	1	74	1	66.5	163	25.03	99	99	3	11	10	1	2	99	99	141	100	99	99	3	N1	3	MD						0	3
0	1	99	69	1	48.2	160	18.83	1	99	2	2	13	1	3	99	99	228	150	99	99	1	N0	0	WD						0	2
0	1	99	48	2	58	160	22.66	99	99	11	11	9	1	2	99	99	162	50	99	99	1	N0	0	WD						0	1
0	1	1	51	1	65	167	23.31	99	99	2	3	9	1	3	1	99	496	700	99	1	2	N0	0	MD	C	4	22	1	2009-12-01	2	3
0	1	1	62	2	60	156	24.65	99	99	2	3	8	1	11	99	99	339	0	99	1	0	N0	0	MD						0	0
0	1	1	49	1	58	174	19.16	99	99	2	2	11	1	3	1	99	564	0	99	1	0	N0	0	MD						0	0
0	1	1	32	1	75	183	22.4	99	99	11	3	6	1	3	99	99	345	0	99	1	1	N0	0	MD						0	2
0	1	99	74	1	51.1	165	18.77	99	99	11	3	14	1	11	99	99	434	650	99	99	3	N1	1	MD						0	2
0	1	99	58	1	69	172	23.32	99	99	2	2	7	1	2	99	99	200	10	99	99	2	N0	0	MD						0	3
0	1	1	52	1	60	173	20.05	99	99	2	2	21	1	2	99	99	232	400	99	99	1	N0	0	MD						0	2
0	1	99	38	2	53	167	19	99	99	11	2	9	1	3	99	99	250	100	99	99	2	N0	0	MD						0	3
0	1	99	46	2	49	158	19.63	99	1	11	2	11	1	11	99	99	120	0	99	99	3	N2	4	MD						0	3
0	1	99	57	2	64	157	25.96	99	1	2	2	10	1	3	99	99	337	0	1	99	3	N2	5	MD						0	3
0	1	99	66	2	57.2	157	23.25	1	99	2	2	6	1	2	99	99	311	50	99	99	1	N0	0	MD						0	1
0	1	99	50	2	62.4	162	23.78	99	99	11	2	11	1	2	99	99	184	0	99	1	3	N1	1	MD						0	3
0	1	1	58	1	71.8	170	24.84	99	99	11	2	7	1	3	99	99	339	0	99	1	2	N0	0	MD						0	3
0	1	99	72	1	71	166	25.77	99	99	2	2	6	1	2	99	99	268	0	99	99	2	N0	0	MD						0	3
0	1	99	69	1	64	167	22.95	99	1	2	11	6	1	3	99	99	398	0	99	99	1	N0	0	MD						0	2
0	1	99	63	2	45.5	154	18.94	99	1	11	2	17	1	2	99	99	246	0	99	1	1	N0	0	MD	C	1	5	1	2009-12-16	1	2
0	1	99	79	1	40	165	14.69	99	99	11	2	9	1	2	99	99	177	70	99	99	3	N1	1	MD						0	4
0	1	99	79	1	65	152	28.13	99	99	2	11	8	1	2	99	99	320	0	99	99	1	N0	0	MD						0	2
0	1	1	56	1	65	170	22.49	1	99	2	3	8	1	3	99	99	247	0	99	1	2	N0	0	MD						0	3
0	1	99	52	1	78	174	25.76	99	99	2	2	9	1	3	99	99	458	0	99	99	0	N0	0	WD						0	0
0	1	1	62	1	83.4	168	29.55	1	99	2	11	11	1	11	99	99	168	100	99	99	1	N0	0	MD						0	2
0	1	99	66	1	73.7	166	26.43	99	99	3	2	8	1	2	99	99	283	0	99	99	1	N0	0	WD						0	1
0	1	1	67	1	54	158	21.63	99	99	11	2	10	1	2	99	99	281	750	99	1	1	N0	0	MD						0	2
0	1	1	60	1	59.9	162	22.82	99	99	2	2	6	1	2	99	99	196	0	99	99	3	N2	4	MD						0	3
0	1	99	45	2	55	160	21.48	99	99	11	2	10	1	3	99	99	225	100	99	99	3	N1a	1	MD						0	3
0	1	99	63	1	66	167	23.67	99	99	11	2	10	1	11	1	99	265	700	99	99	1	N0	0	MD						0	2
0	1	99	78	2	67	165	24.61	99	99	2	2	11	1	3	1	99	230	200	99	99	1	N0	0	MD						0	2
0	1	99	53	2	64	161	24.69	99	1	11	3	10	1	2	1	99	236	0	99	99	3	N1b	3	MD						0	2
0	1	1	51	2	76	161	29.32	99	99	2	2	9	1	3	99	99	290	150	99	99	2	N0	0	MD						0	3
0	1	99	66	1	72.4	165	26.59	1	99	2	2	9	1	3	1	99	565	160	99	99	1	N0	0	MD						0	1
0	1	99	40	2	60	154	25.3	99	1	2	2	7	1	3	1	99	320	0	99	1	4	N0	0	WD	C	16	112	2	2010-04-26	2	3
0	1	99	75	1	62	157	25.15	99	99	2	3	11	1	3	1	99	440	370	99	1	2	N0	0	MD						0	3
0	1	99	74	1	62.6	170	21.66	99	99	11	11	8	1	2	99	99	219	300	99	99	3	N2a	5	MD						0	3
0	1	99	44	2	49.5	159	19.58	99	99	2	11	27	1	11	99	99	178	800	99	99	3	N2a	5	PD	C	1	7	1	2010-01-21	1	3
0	1	1	71	1	64.1	166	23.26	99	99	2	2	22	1	2	99	99	177	0	99	99	1	N0	0	WD	C	1	2	1	2010-01-16	0	1
0	1	99	58	2	59.3	158	23.75	99	99	2	11	24	1	2	1	99	242	0	99	99	1	N0	0	PD						0	1
0	1	1	65	2	63	159	24.92	99	1	2	2	7	1	3	99	99	326	500	99	99	3	N1a	1	MD						0	2
0	1	1	58	1	71	167	25.46	99	99	2	2	5	1	2	99	99	230	0	99	1	1	N0	0	MD						0	1
0	1	99	82	1	68	164	25.28	99	99	2	2	38	1	2	99	99	131	40	99	99	2	N0	0	MD	C	1	4	1	2010-01-02	1	3
0	1	99	51	2	67	161	25.85	99	99	2	2	24	1	2	99	99	229	80	99	99	1	N0	0	MD	C	1	3	1	2010-01-25	1	2
0	1	99	53	1	65.8	170	22.77	99	99	11	11	20	1	3	99	99	484	750	99	1	4	N1b	3	MD	C	1	4	1	2010-01-30	1	3
0	1	99	50	1	57	166	20.69	99	99	11	2	12	1	3	99	99	280	50	99	99	2	N0	0	MD						0	3
0	1	99	63	2	59	143	28.85	99	99	2	2	7	1	3	99	99	403	0	99	99	1	N0	0	WD						0	1
0	1	99	58	1	60	168	21.26	99	99	11	2	6	1	3	1	99	366	80	99	1	3	N2a	4	MD	C	3	17	1	2010-02-08	2	3
0	1	1	52	1	88	170	30.45	99	99	2	11	12	1	3	99	99	290	0	99	99	2	N0	0	MD						0	3
0	1	99	65	2	57	150	25.33	99	99	2	11	8	1	2	99	99	180	0	99	99	2	N0	0	MD						0	3
0	1	99	43	2	48	156	19.72	99	1	11	2	8	1	3	99	99	339	0	99	99	3	N1b	3	MD						0	2
0	1	99	60	1	65	162	24.77	1	99	2	2	43	1	2	99	99	221	0	99	99	1	N0	0	MD	C	2	10	1	2010-02-08	1	1
0	1	99	45	2	49	156	20.13	99	99	11	2	10	1	11	99	99	340	650	99	1	4	N1b	2	WD						0	3
0	1	99	67	1	64	166	23.23	99	99	11	2	8	1	3	99	99	328	50	99	99	1	N0	0	MD						0	2
0	1	99	47	1	72.4	170	25.05	99	99	2	2	10	1	3	1	99	276	20	99	99	1	N0	0	MD						0	2
0	1	99	56	2	66.8	158	26.76	99	99	2	2	25	1	2	99	99	320	0	99	99	4	N2b	19	MD						0	3
0	1	99	67	2	60	153	25.63	99	99	2	11	8	1	2	99	99	190	250	99	99	1	N0	0	MD						0	2
0	1	99	41	2	72	162	27.43	99	99	2	2	9	1	3	1	99	352	0	99	99	3	N1b	3	MD						0	3
0	1	1	54	1	77	162	29.34	99	99	2	11	21	1	11	99	99	158	100	99	99	3	N1a	1	MD						0	3
0	1	99	71	2	54	160	21.09	1	1	2	2	10	1	2	99	99	285	0	99	99	1	N0	0	WD						0	2
0	1	1	63	1	64.9	168	22.99	99	99	11	2	17	1	3	1	99	363	400	99	99	3	N1a	1	MD						0	3
0	1	99	47	2	54	150	24	99	1	11	2	9	1	3	1	99	419	170	99	99	3	N1a	1	MD						0	2
0	1	99	71	1	65	182	19.62	99	99	11	2	10	1	2	99	99	249	80	99	99	3	N1b	3	MD						0	2
0	1	99	58	1	69.4	174	22.92	1	99	2	2	44	1	11	99	99	860	1900	99	1	4	N1a	1	MD						0	3
0	1	99	60	1	64.5	164	23.98	99	99	2	2	6	1	2	99	99	196	0	99	99	0	N0	0	WD						0	0
0	1	99	63	1	60	163	22.58	1	99	2	2	10	1	2	1	99	242	0	99	99	2	N0	0	MD						0	3
0	1	99	67	2	52.1	146	24.44	1	99	2	2	10	1	3	1	99	435	180	99	99	1	N0	0	MD						0	1
0	1	1	58	1	47	168	16.65	99	99	11	2	8	1	3	99	99	316	50	99	99	3	N2b	8	MD						0	3
0	1	1	54	1	56	172	18.93	99	99	11	2	7	1	3	99	99	235	100	99	99	1	N0	0	MD						0	2
0	1	99	62	1	58	165	21.3	99	99	11	11	6	1	3	99	99	284	0	99	99	1	N0	0	MD						0	1
0	1	99	71	2	58	158	23.23	99	99	2	11	12	1	2	99	99	210	0	99	99	3	N1b	2	MD						0	3
0	1	1	60	1	49	160	19.14	99	99	11	2	8	1	2	1	99	297	30	99	1	1	N0	0	MD						0	1
0	1	1	54	1	77	170	26.64	99	99	2	2	5	1	2	99	99	288	75	99	99	3	N1b	2	MD						0	4
0	1	1	58	1	46	167	16.49	99	99	11	2	26	1	3	99	99	278	200	99	99	3	N1b	3	MD	C	1	4	1	2010-03-02	2	3
0	1	1	71	1	80	175	26.12	99	99	2	11	9	1	3	99	99	489	270	99	99	3	N2a	4	MD						0	3
0	1	1	52	1	75	178	23.67	99	99	11	2	11	1	11	99	99	283	360	99	99	3	N1a	1	MD						0	3
0	1	99	62	1	60.4	161	23.3	99	99	2	2	26	1	2	99	99	285	0	99	99	3	N1b	2	MD	C	2	8	1	2010-03-16	1	2
0	1	99	68	2	60.2	154	25.38	99	1	2	3	9	1	2	1	99	218	10	99	99	3	N1a	1	MD						0	2
0	1	99	60	2	67	158	26.84	99	99	3	2	15	1	2	99	99	295	0	99	99	0	N0	0	WD						0	0
0	1	99	57	1	64.3	164	23.62	99	99	11	3	10	1	3	1	99	467	200	99	99	1	N0	0	MD						0	2
0	1	99	79	2	67	158	26.84	1	1	2	2	10	1	2	1	99	145	350	99	99	2	N0	0	MD						0	3
0	1	99	78	2	65	163	24.46	1	99	2	11	14	1	2	99	99	240	0	99	99	2	N0	0	MD						0	3
0	1	1	56	1	60	170	20.76	1	99	2	3	24	1	11	1	99	384	550	99	1	4	N0	0	MD						0	3
0	1	99	68	1	65	164	24.17	99	99	2	2	10	1	2	1	99	290	0	99	1	3	N1b	2	MD						0	3
0	1	1	68	1	61	167	21.87	99	99	2	3	7	1	3	99	99	442	400	99	1	2	N0	0	MD						0	3
0	1	1	58	1	65	163	24.46	99	99	11	11	5	1	3	99	99	334	0	99	99	1	N0	0	MD						0	1
0	1	1	70	1	65	162	24.77	99	99	2	3	7	1	2	1	99	307	40	99	1	1	N0	0	MD						0	1
0	1	99	70	2	44.4	147	20.55	1	99	2	11	21	1	11	1	99	424	550	99	1	4	N2b	10	MD						0	3
0	1	99	62	2	57	153	24.35	99	99	2	3	6	1	3	1	99	348	50	99	1	4	N1b	3	MD						0	3
0	1	99	69	1	68.5	158	27.44	99	99	2	11	7	1	2	99	99	181	0	99	99	1	N0	0	MD						0	1
0	1	99	77	2	61.2	155	25.47	99	99	2	2	7	1	3	1	99	317	0	99	1	2	N0	0	MD						0	3
0	1	1	69	1	57.3	164	21.05	1	99	2	2	18	1	3	99	99	323	850	99	99	1	N0	0	WD	C	11	71	2	2010-06-10	2	1
0	1	1	64	1	67	168	23.74	99	99	2	11	8	1	2	99	99	270	0	99	99	3	N1a	1	MD						0	2
0	1	1	64	2	54	149	24.32	99	99	11	2	9	1	11	99	99	360	500	99	1	2	N0	0	MD						0	4
0	1	99	69	2	53	154	22.35	99	99	3	2	9	1	2	99	99	278	0	99	99	3	N1a	1	MD						0	2
0	1	1	58	1	60	165	22.04	99	1	2	11	9	1	11	99	99	180	20	99	99	3	N2a	5	MD						0	3
0	1	99	47	1	68	177	21.71	99	99	11	11	22	1	11	99	99	207	350	99	1	2	N0	0	MD	C	2	8	1	2010-04-23	1	3
0	1	99	64	1	76	166	27.58	99	99	2	11	27	1	2	99	99	309	200	99	99	3	N1b	3	MD						0	3
0	1	99	67	2	60	152	25.97	99	1	2	2	40	1	3	1	99	320	10	99	99	3	N1a	1	WD						0	2
0	1	99	74	2	68	142	33.72	99	1	2	2	9	1	2	99	99	256	0	99	99	3	N1a	1	WD						0	1
0	1	99	68	2	53.1	154	22.39	99	99	11	3	11	1	3	99	99	356	150	99	99	3	N1b	2	MD						0	3
0	1	1	47	1	78	173	26.06	99	99	2	3	15	1	3	1	99	663	300	99	1	2	N0	0	MD	C	2	8	1	2010-04-09	2	3
0	1	99	47	2	54	160	21.09	99	99	11	3	10	1	11	1	1	239	300	99	1	3	N2a	4	MD						0	3
0	1	1	41	1	86.4	186	24.97	99	99	11	2	20	1	3	1	99	490	150	99	1	2	N0	0	MD	C	1	6	1	2010-04-21	1	3
0	1	1	59	1	72	166	26.13	99	1	2	2	27	1	3	1	99	202	300	99	99	1	N0	0	MD	C	2	8	1	2010-05-08	2	2
0	1	1	57	1	67.7	168	23.99	1	99	2	2	5	1	3	1	99	514	600	99	1	3	N1a	1	Mucinous						0	3
0	1	1	55	1	50	159	19.78	99	99	11	2	15	1	3	1	99	373	60	99	99	2	N0	0	MD						0	3
0	1	99	49	2	49	152	21.21	99	1	11	2	14	1	2	99	99	403	900	99	99	4	N0	0	MD						0	3
0	1	1	71	1	65	170	22.49	99	99	3	11	16	1	2	1	99	328	250	99	99	2	N0	0	MD						0	3
0	1	99	66	2	49	150	21.78	99	1	11	2	7	1	2	99	99	258	100	99	99	2	N0	0	WD						0	3
0	1	99	70	2	53	157	21.5	99	99	2	2	10	1	2	99	99	280	0	99	99	2	N0	0	MD						0	3
0	1	99	46	2	64	154	26.99	99	99	2	2	7	1	3	99	99	328	50	99	99	3	N1b	3	MD						0	3
0	1	99	41	2	48	157	19.47	99	99	11	2	5	1	3	99	99	295	100	99	99	1	N0	0	MD						0	2
0	1	99	47	1	72.8	175	23.77	99	99	11	11	7	1	3	99	99	353	400	99	1	2	N0	0	MD						0	3
0	1	1	61	1	58	163	21.83	1	99	2	2	5	1	2	99	99	224	0	99	1	3	N1a	1	MD						0	3
0	1	99	66	2	50	154	21.08	99	99	2	2	9	1	2	99	99	233	0	99	99	1	N0	0	MD						0	1
0	1	1	56	1	63	176	20.34	99	99	11	2	6	1	2	99	99	340	350	99	1	1	N0	0	MD	C	20	138	2	2010-08-30	2	2
0	1	99	63	1	64	174	21.14	99	99	11	3	9	1	11	99	99	452	1150	99	1	4	N2b	8	MD						0	3
0	1	1	65	1	72	174	23.78	99	99	11	2	8	1	2	99	99	290	100	99	1	4	N1	1	PD						0	0
0	1	99	61	1	60.1	168	21.04	1	99	3	11	10	1	11	99	99	185	100	99	99	3	N2a	6	MD						0	3
0	1	1	50	1	66.5	164	24.72	99	99	11	2	21	1	3	99	99	317	100	99	99	3	N2b	14	MD						0	3
0	1	1	55	1	59	165	21.67	99	99	11	2	7	1	3	99	99	361	300	99	99	2	N0	0	MD						0	3
0	1	1	76	1	65	167	23.31	99	1	11	2	11	1	2	1	99	441	400	99	99	1	N0	0	MD						0	2
0	1	1	57	1	60	164	22.31	99	99	2	3	19	1	3	1	99	515	650	99	1	1	N0	0	MD						0	2
0	1	1	52	1	57	162	21.72	99	99	11	2	11	1	3	1	99	383	100	99	99	1	N0	0	MD						0	2
0	1	99	46	2	51	162	19.43	99	1	11	2	9	1	2	1	99	398	0	99	99	1	N0	0	MD	C	8	51	2	2010-07-14	0	2
0	1	1	46	1	81.5	175	26.61	99	1	2	11	20	1	3	99	99	157	0	99	99	3	N1a	1	MD	C	2	8	1	2010-05-11	1	1
0	1	99	65	2	63.5	160	24.8	99	99	11	3	9	1	3	1	99	370	150	99	99	1	N0	0	WD						0	1
0	1	1	63	1	75	170	25.95	99	99	2	2	7	1	2	99	99	206	150	99	99	1	N0	0	WD						0	2
0	1	99	68	2	66	158	26.44	1	99	2	2	7	1	2	99	99	354	500	99	99	2	N0	0	MD						0	3
0	1	1	68	1	56	168	19.84	1	99	2	2	15	1	2	99	99	212	0	99	99	1	N0	0	WD						0	1
0	1	1	60	1	70	172	23.66	99	99	11	2	6	1	2	99	99	182	0	99	99	2	N0	0	MD						0	3
0	1	99	39	2	59.5	162	22.67	99	99	11	2	6	1	3	99	99	285	50	99	1	3	N1b	3	MD						0	3
0	1	99	47	1	69	170	23.88	99	99	11	11	7	1	3	99	99	346	0	99	99	3	N2a	4	WD						0	3
0	1	99	70	1	56	170	19.38	99	99	11	11	8	1	3	99	99	265	50	99	99	2	N0	0	MD						0	3
0	1	99	71	1	64.5	161	24.88	99	99	11	2	17	1	11	99	99	417	200	99	99	3	N2a	6	MD						0	3
0	1	99	75	2	46	154	19.4	99	1	11	3	12	1	3	1	99	380	0	99	1	0	N0	0	WD						0	0
0	1	1	74	2	46	155	19.15	99	99	11	2	10	1	2	99	99	174	0	99	99	2	N0	0	MD						0	3
0	1	99	73	1	58.7	168	20.8	99	99	11	2	14	1	3	1	99	324	100	99	99	1	N0	0	WD						0	1
0	1	99	66	1	68.4	166	24.82	99	99	2	2	13	1	11	1	99	216	150	99	1	1	N0	0	MD						0	2
0	1	1	70	2	49.2	140	25.15	99	99	2	2	12	1	2	99	99	297	300	99	1	3	N1a	1	MD						0	3
0	1	1	67	1	58	156	23.83	99	1	11	2	14	1	11	1	99	350	500	99	99	3	N1a	1	MD						0	1
0	1	1	65	1	65	166	23.59	99	99	11	2	9	1	11	1	99	207	100	99	1	0	N0	0	MD						0	0
0	1	99	64	2	59	152	25.54	99	1	2	2	14	1	2	1	99	279	100	99	99	3	N1a	1	MD						0	1
0	1	1	37	2	37.1	150	16.49	99	99	11	2	8	1	11	1	99	206	400	99	1	2	N0	0	WD						0	3
0	1	1	47	1	95	181	29	99	99	2	2	29	1	3	99	99	439	0	99	99	2	N0	0	MD	C	1	3	1	2010-06-06	1	3
0	1	99	71	1	61	173	20.38	99	99	2	2	6	1	3	99	99	320	50	99	99	2	N0	0	MD						0	3
0	1	1	58	1	67	163	25.22	1	99	2	11	14	1	3	99	99	499	10	99	99	4	N2b	7	PD	C	1	3	1	2010-06-27	1	3
0	1	1	73	1	65	161	25.08	99	99	2	2	9	1	3	1	99	485	740	99	99	3	N2a	6	MD						0	3
0	1	99	71	1	58	158	23.23	99	99	11	2	7	1	2	99	99	170	0	99	99	2	N0	0	MD						0	3
0	1	1	58	1	62	167	22.23	99	1	2	11	10	1	3	99	99	215	0	99	99	1	N0	0	MD						0	1
0	1	99	57	2	50	152	21.64	1	99	2	2	12	1	3	99	99	221	0	99	99	2	N0	0	MD						0	3
0	1	99	57	2	62	151	27.19	99	99	2	2	22	1	3	1	99	432	500	99	1	0	N0	0	WD						0	0
0	1	99	39	2	46	153	19.65	99	99	11	2	6	1	2	99	99	232	100	99	99	1	N0	0	WD						0	1
0	1	99	54	2	71	160	27.73	1	99	2	2	9	1	2	99	99	279	50	99	99	1	N0	0	WD						0	2
0	1	99	69	1	68	161	26.23	99	99	2	2	10	1	2	1	99	243	300	99	1	2	N0	0	MD						0	3
0	1	1	73	1	54.7	166	19.85	99	99	2	3	9	1	3	1	99	463	0	99	1	1	N0	0	PD						0	1
0	1	1	71	2	55	156	22.6	99	99	2	2	10	1	2	1	1	277	300	1	1	3	N1b	2	MD						0	3
0	1	99	66	1	64	171	21.89	99	99	2	3	16	1	11	99	99	261	200	99	99	1	N0	0	WD						0	1
0	1	1	63	2	52	156	21.37	99	99	11	3	7	1	3	99	99	361	0	99	1	2	N0	0	MD						0	3
0	1	1	64	1	71	165	26.08	99	99	2	2	37	1	2	1	99	348	0	99	99	3	N1b	2	MD	C	1	5	1	2010-07-06	1	3
0	1	1	58	1	67	166	24.31	99	1	11	2	7	1	3	99	99	316	150	99	99	2	N0	0	MD						0	3
0	1	99	61	1	69	165	25.34	99	99	2	2	9	1	3	99	99	309	0	99	99	1	N0	0	MD						0	2
0	1	99	67	2	57	156	23.42	1	99	2	2	8	1	2	99	99	276	200	99	99	3	N2	8	WD	C	4	22	1	2009-11-12	2	3
0	1	1	67	1	62.2	164	23.16	99	99	11	11	9	1	2	99	99	172	0	99	99	2	N0	0	MD						0	3
0	1	99	57	1	65.5	168	23.21	1	99	2	2	16	1	11	1	99	415	400	99	99	2	N0	0	MD						0	3
0	1	1	59	1	56.4	165	20.72	99	99	11	2	17	1	2	99	99	275	250	99	99	2	N0	0	MD	C	1	5	1	2010-08-04	0	4
0	1	99	42	2	54	157	21.91	99	99	11	11	9	1	11	99	99	221	500	99	99	3	N2b	18	MD						0	3
0	1	99	76	1	56	162	21.34	1	99	2	2	15	1	2	99	99	257	250	99	99	1	N0	0	MD						0	2
0	1	99	49	2	38	150	16.89	99	99	11	2	8	1	3	99	99	303	0	99	99	3	N1b	3	MD						0	2
0	1	99	60	1	68	165	24.98	99	99	11	2	12	1	2	1	99	220	350	99	1	3	N1a	1	MD						0	3
0	1	99	73	1	56	172	18.93	99	99	11	2	26	1	2	99	99	197	800	99	99	1	N0	0	MD	C	1	2	1	2010-08-18	0	2
0	1	1	53	1	58	173	19.38	99	99	11	2	9	1	2	1	99	342	0	99	99	3	N1b	3	MD						0	3
0	1	99	72	2	75	162	28.58	99	99	2	2	16	1	3	99	99	365	360	99	1	2	N0	0	MD	C	1	2	1	2010-08-21	1	3
0	1	1	56	1	66	160	25.78	99	1	2	3	12	1	2	1	99	217	100	1	99	1	N0	0	MD						0	2
0	1	99	58	1	82	168	29.05	1	99	2	2	12	1	2	99	99	426	600	99	99	3	N1a	1	MD	C	1	3	1	2010-08-26	0	3
0	1	99	54	1	83	172	28.06	99	1	2	2	8	1	2	1	99	257	0	99	99	1	N0	0	MD						0	2
0	1	1	62	1	73	168	25.86	99	99	2	11	6	1	2	99	99	187	0	99	99	2	N0	0	MD						0	3
0	1	99	72	2	58	148	26.48	99	1	2	2	7	1	3	1	99	260	200	99	99	4	N2a	4	MD						0	3
0	1	99	69	2	65	149	29.28	99	99	2	11	7	1	2	99	99	270	500	99	99	1	N0	0	MD						0	2
0	1	99	49	2	59.5	159	23.54	99	99	11	11	7	1	3	99	99	244	100	99	99	1	N0	0	MD						0	1
0	1	99	54	2	58.5	158	23.43	99	99	2	2	6	1	2	99	99	186	0	99	1	2	N0	0	MD						0	3
0	1	1	50	1	67.5	171	23.08	99	99	2	11	7	1	3	99	99	317	0	99	99	1	N0	0	WD						0	1
0	1	1	77	1	65	161	25.08	99	99	2	2	7	1	3	99	99	329	0	99	99	3	N1a	1	MD	C	3	16	1	2010-08-28	2	3
0	1	1	60	1	57	176	18.4	99	99	11	2	9	1	3	99	99	279	100	99	1	0	N0	0	MD						0	0
0	1	1	75	1	50	168	17.72	99	99	11	2	8	1	3	99	99	247	0	99	1	1	N0	0	WD						0	2
0	1	1	68	1	59	171	20.18	99	1	2	2	10	1	2	99	99	257	0	99	1	2	N0	0	MD	C	1	3	1	2010-08-23	0	3
0	1	1	59	1	63	167	22.59	99	1	11	2	7	1	2	99	99	196	0	99	1	3	N1b	2	MD						0	3
0	1	99	66	2	54	153	23.07	99	99	11	2	9	1	2	99	99	198	0	99	99	2	N0	0	WD						0	3
0	1	1	51	1	70	168	24.8	99	99	11	3	10	1	3	1	99	427	200	99	1	2	N0	0	MD						0	3
0	1	1	48	2	53	161	20.45	99	99	11	11	13	1	2	99	99	211	350	99	99	1	N0	0	MD						0	1
0	1	99	63	2	57	158	22.83	99	99	11	3	9	1	3	1	99	400	40	99	1	0	N0	0	MD						0	0
0	1	1	64	1	71	167	25.46	99	99	2	11	9	1	11	99	99	243	0	99	99	3	N1a	1	MD						0	3
0	1	1	54	1	81	171	27.7	99	99	2	2	11	1	3	1	99	390	500	99	1	0	N0	0	MD						0	0
0	1	1	55	1	75	165	27.55	99	99	2	11	8	1	3	99	99	315	0	99	1	1	N0	0	MD						0	2
0	1	1	55	2	47	145	22.35	99	99	11	11	19	1	2	99	99	180	150	99	99	1	N0	0	MD	C	1	5	1	2010-09-25	1	1
0	1	1	63	1	80	176	25.83	99	1	2	2	13	1	11	99	99	232	200	99	99	2	N0	0	MD						0	3
0	1	1	58	1	72	165	26.45	99	99	2	11	8	1	2	99	99	234	0	99	99	2	N0	0	MD						0	3
0	1	99	47	2	48	159	18.99	99	99	2	3	4	1	3	1	99	276	0	99	1	0	N0	0	MD						0	0
0	1	1	60	2	49	146	22.99	99	99	11	2	6	1	2	99	99	167	0	99	99	3	N1b	2	MD						0	1
0	1	99	44	1	71	173	23.72	99	99	2	3	18	1	3	1	99	405	0	99	99	3	N1a	1	MD						0	2
0	1	99	64	1	55	162	20.96	99	99	11	2	5	1	2	99	99	182	0	99	99	3	N1b	2	MD						0	2
0	1	99	60	1	65	178	20.52	99	99	11	2	17	1	2	99	99	221	0	99	1	1	N0	0	MD	C	1	4	1	2010-09-12	1	2
0	1	1	49	1	60	175	19.59	99	99	11	11	5	1	3	1	99	313	50	99	1	1	N0	0	MD						0	2
0	1	99	60	1	61	161	23.53	99	99	11	2	9	1	2	99	99	202	0	99	99	3	N1b	3	MD						0	3
0	1	1	68	2	53	150	23.56	99	99	2	11	9	1	2	1	99	314	150	99	1	2	N0	0	MD						0	3
0	1	99	69	2	52.5	145	24.97	99	99	11	11	6	1	2	99	99	251	0	99	99	2	N0	0	MD						0	3
0	1	1	48	1	78	175	25.47	99	99	2	11	14	1	2	99	99	275	100	99	1	2	N0	0	MD						0	3
0	1	99	31	2	68	160	26.56	99	99	2	11	8	1	2	99	99	217	0	99	99	2	N0	0	MD						0	3
0	1	1	55	1	77	175	25.14	99	99	2	2	10	1	11	99	99	304	200	99	99	3	N2b	9	MD						0	3
0	1	99	71	2	55	148	25.11	99	99	2	3	14	1	3	1	99	499	200	99	1	0	N0	0	PD						0	0
0	1	1	57	1	80	175	26.12	99	1	2	2	12	1	3	1	99	379	100	99	1	2	N0	0	WD						0	3
0	1	99	49	2	53	161	20.45	99	99	11	11	10	1	3	1	99	323	0	99	99	2	N0	0	MD						0	3
0	1	99	59	2	44.8	153	19.14	99	99	11	3	10	1	2	1	99	326	0	99	1	3	N1a	1	MD						0	3
0	1	99	69	2	51.6	142	25.59	99	99	3	11	13	1	11	99	99	247	0	99	99	2	N0	0	MD						0	4
0	1	99	57	1	63	161	24.3	99	99	11	2	8	1	3	1	99	326	100	99	1	3	N1a	1	MD						0	3
0	1	99	70	2	45	157	18.26	99	1	11	11	10	1	2	99	99	214	0	99	99	3	N1a	1	MD						0	3
0	1	1	68	1	82	176	26.47	99	99	2	2	9	1	3	1	99	319	0	99	1	3	N1b	2	WD						0	3
0	1	1	62	1	63	172	21.3	99	99	2	2	5	1	3	1	99	279	0	99	1	0	N0	0	WD						0	0
0	1	1	49	1	71	181	21.67	99	99	11	11	10	1	2	99	99	288	300	1	99	2	N0	0	MD						0	4
0	1	1	78	1	55	169	19.26	99	99	3	2	6	1	2	99	99	243	50	99	99	1	N0	0	MD						0	2
0	1	99	71	2	54.3	144	26.19	99	99	2	2	7	1	2	99	99	248	100	99	99	1	N0	0	MD						0	2
0	1	1	72	1	63	159	24.92	99	99	11	2	9	1	2	99	99	309	250	99	1	1	N0	0	MD						0	2
0	1	99	50	2	42	160	16.41	99	99	2	2	10	1	11	99	1	398	1400	99	1	2	N0	0	MD						0	3
0	1	1	62	1	76	175	24.82	99	99	2	11	7	1	2	99	99	267	100	99	1	0	N0	0	WD						0	0
0	1	99	77	2	51.5	138	27.04	99	99	2	2	12	1	3	99	99	357	0	99	1	2	N0	0	MD						0	3
0	1	1	53	2	56	160	21.88	99	99	11	2	6	1	3	99	99	322	0	99	99	1	N0	0	MD						0	2
0	1	99	58	2	50	144	24.11	99	99	11	2	8	1	2	99	99	228	150	99	99	1	N0	0	MD						0	2
0	1	1	73	1	73	173	24.39	1	99	2	2	38	1	2	1	99	385	550	99	1	4	N1b	3	PD	C	1	7	1	2010-10-22	2	3
0	1	99	52	1	51	165	18.73	99	99	11	11	7	1	2	99	99	352	0	99	1	2	N0	0	MD						0	3
0	1	99	76	2	47	156	19.31	99	99	11	11	11	1	2	99	99	330	50	99	99	3	N2b	7	MD						0	3
0	1	99	72	2	48	153	20.5	99	1	2	2	7	1	2	99	99	291	50	99	99	2	N0	0	MD						0	3
0	1	1	48	1	62	168	21.97	99	99	11	2	9	1	11	1	99	304	400	99	99	1	N0	0	WD						0	1
0	1	1	70	1	82.5	170	28.55	1	99	2	2	23	1	2	1	99	445	1350	99	99	2	N0	0	MD						0	3
0	1	99	67	2	53.5	151	23.46	99	99	2	2	8	1	2	1	99	207	0	99	99	1	N0	0	MD						0	2
0	1	99	75	2	47	150	20.89	99	99	11	2	7	1	3	1	99	153	0	99	1	0	N0	0	MD						0	0
0	1	99	70	1	71	170	24.57	99	99	2	2	8	1	2	1	99	329	200	99	1	2	N0	0	WD						0	3
0	1	1	47	1	68	172	22.99	99	99	11	2	7	1	3	1	99	159	100	99	99	3	N2a	4	WD						0	3
0	1	1	50	1	72	170	24.91	99	99	11	11	6	1	3	99	99	338	100	99	99	1	N0	0	MD						0	1
0	1	1	28	1	65	168	23.03	99	99	11	3	14	1	3	1	99	312	0	99	99	3	N1b	2	MD						0	2
0	1	99	41	1	54	173	18.04	99	99	11	2	7	1	2	99	99	217	0	99	1	3	N2a	4	MD						0	3
0	1	99	65	2	70	150	31.11	99	99	2	2	7	1	2	99	99	218	170	99	99	1	N0	0	MD						0	2
0	1	1	53	1	62	171	21.2	99	99	11	2	6	1	2	99	99	278	0	99	1	2	N0	0	MD						0	3
0	1	1	46	1	68	176	21.71	99	99	11	2	7	1	3	99	99	253	0	99	99	1	N0	0	MD						0	1
0	1	99	52	1	86	177	27.45	99	99	2	11	17	1	11	1	99	568	1850	99	1	4	N0	0	MD						0	4
0	1	99	63	2	55	149	24.77	99	99	3	3	11	1	3	1	99	394	600	99	1	0	N0	0	MD						0	0
0	1	1	62	1	70	169	24.51	99	99	11	2	8	1	2	1	99	340	400	99	99	2	N0	0	MD						0	3
0	1	99	59	1	73	165	26.81	99	99	2	2	8	1	2	1	99	325	50	99	99	2	N0	0	MD						0	3
0	1	99	50	2	56	156	23.01	99	99	11	3	8	1	3	1	99	473	650	99	1	3	N2a	5	WD						0	2
0	1	99	60	1	78	170	26.99	99	99	2	2	8	1	3	1	99	501	300	99	99	2	N0	0	MD						0	3
0	1	99	77	2	63.2	158	25.32	99	99	2	11	10	1	2	99	99	262	0	99	99	1	N0	0	WD						0	1
0	1	1	54	1	82	161	31.63	99	1	2	2	16	1	3	1	99	502	200	99	1	1	N0	0	MD						0	2
0	1	1	55	1	75	165	27.55	99	99	2	11	19	1	11	99	99	417	450	99	1	4	N0	0	MD						0	0
0	1	1	60	1	75	168	26.57	99	99	2	2	6	1	3	1	99	275	0	99	99	1	N0	0	MD						0	1
0	1	99	48	2	56.6	160	22.11	99	99	11	2	9	1	2	99	99	249	0	99	99	3	N1a	1	MD						0	3
0	1	99	69	1	73	166	26.49	1	99	3	11	18	1	3	1	99	361	400	99	99	2	N0	0	MD						0	3
0	1	99	64	2	45.8	148	20.91	99	99	11	2	73	1	2	99	99	356	200	99	1	4	N1b	2	MD	C	2	12	1	2011-01-04	2	2
0	1	1	69	1	50	167	17.93	99	99	2	2	13	1	2	99	99	237	0	99	1	2	N0	0	MD						0	3
0	1	99	32	2	48.3	168	17.11	99	99	11	3	15	1	3	99	99	331	200	99	99	1	N0	0	WD	C	1	2	1	2010-12-11	1	1
0	1	1	59	1	72	167	25.82	99	99	2	2	10	1	2	99	99	283	50	99	99	1	N0	0	MD						0	1
0	1	99	72	2	63	153	26.91	99	99	2	2	8	1	3	99	99	355	60	99	99	1	N0	0	WD						0	1
0	1	99	51	2	68	151	29.82	1	1	2	2	9	1	2	99	99	259	100	99	1	2	N0	0	MD						0	3
0	1	1	71	1	65	165	23.88	1	99	2	11	7	1	2	99	99	250	0	99	99	1	N0	0	MD						0	2
0	1	99	76	1	59.5	164	21.85	99	99	2	2	17	1	2	99	99	218	0	99	99	3	N1b	2	MD	C	1	3	1	2010-12-25	1	3
0	1	1	73	1	72	168	25.51	1	1	2	2	7	1	2	99	99	351	120	99	1	0	N0	0	WD						0	0
0	1	1	52	1	65	170	22.49	99	99	11	11	12	1	2	99	99	189	350	99	1	2	N0	0	MD						0	3
0	1	99	49	2	53	164	19.71	99	1	11	11	12	1	3	99	99	303	0	99	99	1	N0	0	MD						0	2
0	1	99	70	2	63	151	27.63	1	99	2	2	8	1	2	99	99	265	0	99	99	3	N2b	11	MD						0	3
0	1	1	41	2	74	160	28.91	99	99	2	11	9	1	3	99	99	330	60	99	99	3	N1b	2	MD						0	2
0	1	99	73	1	76.4	175	24.95	1	99	2	2	13	1	2	1	99	493	200	99	1	0	N0	0	MD						0	0
0	1	1	62	1	54	165	19.83	1	99	2	11	8	1	3	99	99	337	20	99	99	3	N1a	1	MD						0	2
0	1	1	72	1	51.9	158	20.79	99	99	11	2	11	1	2	1	99	330	0	99	99	1	N0	0	MD						0	2
0	1	99	62	1	67.8	170	23.46	1	99	2	2	8	1	3	99	99	341	0	99	99	3	N1b	2	MD						0	3
0	1	99	52	2	54	156	22.19	99	99	2	2	8	1	3	99	99	375	0	99	99	4	N1a	1	MD						0	3
0	1	99	43	2	49	160	19.14	99	99	11	2	10	1	11	99	99	235	250	99	99	3	N2a	5	MD						0	3
0	1	99	45	2	74	168	26.22	99	1	2	2	17	1	11	1	99	561	500	99	1	4	N0	0	MD						0	0
0	1	1	75	1	68	171	23.26	99	99	2	2	11	1	2	1	99	273	0	99	1	1	N0	0	MD						0	2
0	1	99	73	1	50	162	19.05	1	99	2	3	5	1	3	1	99	169	0	99	99	3	N1	1	MD						0	3
0	1	99	60	2	46	158	18.43	99	99	11	3	7	1	3	99	99	132	0	99	99	3	N2	10	PD						0	3
0	1	99	73	2	59	153	25.2	99	99	2	11	7	1	3	99	99	317	20	99	99	4	N0	0	MD						0	3
0	1	1	52	1	72	166	26.13	99	99	2	2	6	1	2	99	99	230	200	99	99	2	N0	0	WD						0	3
0	1	99	63	1	68	170	23.53	99	99	11	2	6	1	3	99	99	256	0	99	99	1	N0	0	WD						0	1
0	1	1	62	1	59	160	23.05	99	99	3	2	7	1	3	1	99	305	150	99	1	2	N0	0	MD						0	3
0	1	99	64	2	48	155	19.98	99	99	11	2	8	1	2	99	99	206	50	99	99	1	N0	0	MD						0	1
0	1	1	46	1	61	165	22.41	99	99	11	3	9	1	3	1	99	383	0	99	99	3	N1a	1	MD						0	3
0	1	99	68	1	66	162	25.15	99	99	2	11	12	1	11	99	99	466	700	99	1	4	N0	0	WD						0	3
0	1	1	48	2	81	163	30.49	99	1	2	2	8	1	2	1	99	422	100	99	1	3	N1b	2	MD						0	3
0	1	1	63	1	75	164	27.55	99	99	2	2	6	1	2	1	99	348	90	99	1	3	N1a	1	WD						0	0
0	1	1	63	1	58	160	22.66	99	99	11	2	53	1	2	99	99	181	0	99	99	2	N0	0	WD	C	1	5	1	2011-01-26	1	3
0	1	1	64	1	80	172	27.04	99	99	3	11	7	1	2	99	99	223	0	99	99	1	N0	0	WD						0	1
0	1	99	71	1	60	163	22.58	99	99	11	11	14	1	2	99	99	175	100	99	99	2	N0	0	MD						0	3
0	1	99	51	1	76	170	26.3	99	99	2	11	9	1	2	99	99	285	150	99	99	3	N1b	2	MD						0	3
0	1	99	58	1	48	167	17.21	99	99	11	2	9	1	2	99	99	394	200	99	99	1	N0	0	WD						0	1
0	1	1	73	1	76	165	27.92	99	99	2	3	10	1	2	1	99	429	450	99	99	2	N0	0	WD						0	3
0	1	99	60	2	67	156	27.53	99	1	2	11	9	1	2	99	99	295	50	99	99	1	N0	0	WD						0	1
0	1	99	53	1	65	165	23.88	99	99	11	11	9	1	3	99	99	386	100	99	99	1	N0	0	MD						0	2
0	1	1	50	1	63	170	21.8	99	99	11	2	8	1	3	99	99	345	0	99	99	3	N1b	3	MD						0	3
0	1	1	66	1	47	162	17.91	99	99	11	2	9	1	2	1	99	346	150	99	1	0	N0	0	WD	A	1	5	1	2011-02-20	2	0
0	1	1	40	1	64	169	22.41	99	99	11	11	9	1	3	99	99	253	0	99	99	3	N1b	3	MD						0	3
0	1	99	53	2	68	157	27.59	99	99	2	3	7	1	3	99	99	313	20	99	99	3	N1a	1	MD						0	2
0	1	1	56	1	64	173	21.38	99	99	2	3	7	1	3	1	99	381	0	99	1	1	N0	0	MD						0	2
0	1	1	61	1	62	173	20.72	99	99	11	2	7	1	2	99	99	279	0	99	1	2	N0	0	WD						0	3
0	1	99	79	2	62	157	25.15	99	99	2	2	9	1	2	99	99	261	150	99	1	2	N0	0	MD						0	3
0	1	99	60	1	75.8	173	25.33	99	99	2	2	7	1	3	99	99	453	50	99	99	3	N1a	1	WD						0	2
0	1	99	54	2	46	163	17.31	99	99	11	11	9	1	2	99	99	230	120	99	99	1	N0	0	MD						0	2
0	1	99	53	2	49.6	151	21.75	99	99	11	2	11	1	2	99	99	259	0	99	99	1	N0	0	WD						0	1
0	1	99	47	1	64	168	22.68	99	99	11	3	7	1	3	1	99	254	50	99	1	2	N0	0	MD						0	3
0	1	1	66	1	80	173	26.73	1	99	2	11	10	1	3	99	99	213	30	99	99	1	N0	0	MD						0	1
0	1	1	71	1	61	160	23.83	99	99	2	2	7	1	3	99	99	306	0	99	99	1	N0	0	MD						0	2
0	1	1	32	1	79	184	23.33	99	99	11	2	7	1	3	99	99	364	0	99	1	1	N0	0	MD						0	2
0	1	99	59	2	55.4	162	21.15	99	99	2	3	7	1	3	99	99	274	0	99	99	1	N0	0	MD						0	2
0	1	99	61	2	60	158	23.73	99	99	2	3	6	1	2	99	99	285	120	99	99	2	N0	0	MD						0	3
0	1	99	54	2	53	158	21.23	99	99	11	3	8	1	3	99	99	287	0	99	1	1	N0	0	Mucinous	C	8	53	2	2011-05-20	2	2
0	1	99	75	2	62	152	26.84	99	99	2	2	13	1	2	99	99	444	300	99	99	3	N1b	3	MD						0	3
0	1	1	70	1	75	169	26.26	99	99	2	2	11	1	3	1	99	526	400	99	99	4	N0	0	MD						0	3
0	1	1	79	1	63	156	25.89	99	99	2	11	8	1	2	99	99	200	0	99	99	2	N0	0	MD						0	3
0	1	99	55	1	70	170	24.22	99	99	2	2	10	1	11	1	99	492	510	99	1	4	N0	0	WD						0	0
0	1	99	55	1	60	170	20.76	99	99	11	11	7	1	2	99	99	173	100	99	99	3	N2b	7	MD						0	3
0	1	99	69	1	68	180	20.99	1	99	2	2	27	1	2	1	99	476	1400	99	1	0	N0	0	MD	B	2	8	1	2011-04-12	0	0
0	1	99	39	2	54	157	21.91	99	99	11	2	7	1	3	99	99	319	90	99	1	3	N1a	1	MD						0	3
0	1	99	64	1	73	175	23.84	99	1	2	2	22	1	2	99	99	257	0	99	99	1	N0	0	WD						0	1
0	1	1	56	1	75	176	23.94	99	99	11	2	13	1	2	99	99	267	0	99	99	1	N0	0	MD	C	1	2	1	2011-04-15	1	2
0	1	99	55	2	52	155	21.64	99	99	11	2	11	1	11	99	99	178	150	99	1	3	N1b	3	MD						0	3
0	1	99	75	2	42	140	21.43	99	1	11	2	10	1	2	99	99	270	150	99	99	1	N0	0	WD						0	2
0	1	99	62	2	56	154	23.61	99	99	11	11	14	1	2	99	99	290	100	99	99	3	N1a	1	MD						0	3
0	1	99	54	2	60	152	25.97	99	99	2	2	12	1	2	99	99	216	200	99	1	1	N0	0	WD						0	2
0	1	99	48	2	55	159	21.76	99	99	11	2	9	1	3	99	99	397	0	99	99	3	N1a	1	MD						0	2
0	1	1	66	1	69	166	25.04	1	99	2	11	8	1	2	99	99	248	0	99	99	3	N2a	4	MD						0	2
0	1	1	61	1	75	172	25.35	99	99	2	11	11	1	2	99	99	182	350	99	99	1	N0	0	MD						0	2
0	1	99	22	2	61	168	21.61	99	99	11	2	6	1	3	1	99	367	110	99	99	3	N2b	9	MD						0	3
0	1	99	63	1	71	162	27.05	99	99	2	2	7	1	3	99	99	278	0	99	1	1	N0	0	MD						0	2
0	1	99	44	2	57	168	20.2	99	1	11	3	8	1	2	99	99	220	0	99	1	1	N0	0	Mucinous						0	2
0	1	1	55	1	56	171	19.15	99	99	11	2	11	1	2	99	99	234	0	99	1	2	N0	0	MD						0	3
0	1	99	64	2	69	155	28.72	1	99	2	3	7	1	2	99	99	263	0	99	1	3	N1a	1	MD						0	3
0	1	1	68	1	68	168	24.09	99	99	11	2	8	1	2	99	99	286	0	99	1	3	N2b	8	MD	C	1	3	1	2011-04-21	1	1
0	1	1	74	1	56	165	20.57	99	99	11	11	6	1	2	99	99	208	0	99	1	2	N0	0	MD						0	3
0	1	99	66	1	68	168	24.09	99	99	11	11	6	1	2	99	99	310	50	99	99	3	N2a	4	MD						0	3
0	1	99	68	2	67.5	150	30	99	99	2	2	6	1	2	99	99	276	0	99	99	1	N0	0	WD						0	1
0	1	99	59	2	47	157	19.07	1	1	2	2	7	1	2	99	99	260	0	99	1	1	N0	0	WD						0	2
0	1	99	52	1	77	174	25.43	99	99	2	2	8	1	3	99	99	399	300	99	99	3	N1a	1	MD						0	1
0	1	1	62	1	66	165	24.24	1	99	2	3	12	1	2	1	99	347	150	99	99	2	N0	0	MD						0	3
0	1	99	69	2	51.3	156	21.08	1	99	2	11	26	1	11	1	99	538	800	99	99	4	N0	0	MD						0	3
0	1	99	60	1	69	168	24.45	99	99	2	2	7	1	2	99	99	284	100	99	99	1	N0	0	MD						0	1
0	1	1	50	1	64	170	22.15	99	99	11	2	11	1	3	1	99	458	200	99	1	2	N0	0	MD						0	3
0	1	1	59	1	69	169	24.16	99	99	11	2	9	1	3	1	99	473	600	99	1	0	N0	0	WD						0	0
0	1	99	55	2	60	160	23.44	99	99	11	11	9	1	2	99	99	188	100	99	99	3	N2a	6	MD						0	4
0	1	1	71	1	71.5	171	24.45	99	99	11	2	8	1	11	1	99	363	200	1	1	3	N1b	3	Mucinous						0	3
0	1	1	59	1	72	168	25.51	99	99	2	2	9	1	3	1	99	427	0	99	1	1	N0	0	WD						0	2
0	1	99	58	2	52	157	21.1	99	99	11	2	7	1	2	99	99	271	500	99	99	3	N1b	3	MD						0	3
0	1	99	59	2	48	147	22.21	99	1	2	11	16	1	2	99	99	186	150	99	99	3	N1a	1	MD	C	1	5	1	2011-05-30	1	3
0	1	99	79	2	35.5	150	15.78	1	99	2	2	9	1	11	99	99	188	300	1	99	3	N1b	2	MD						0	4
0	1	1	74	1	66	167	23.67	99	99	2	2	8	1	3	99	99	350	0	99	99	3	N1b	2	MD						0	2
0	1	99	50	2	79	159	31.25	99	99	2	2	6	1	3	99	99	299	250	99	99	1	N0	0	WD						0	1
0	1	1	50	1	63	169	22.06	99	99	11	3	11	1	3	99	99	196	0	99	1	0	N0	0	WD						0	0
0	1	99	66	1	64	164	23.8	99	99	11	2	7	1	2	99	99	194	50	99	99	2	N0	0	MD						0	3
0	1	1	54	1	60	167	21.51	99	99	11	2	6	1	3	99	99	123	0	99	99	2	N0	0	MD						0	3
0	1	99	70	1	53	153	22.64	99	99	11	2	7	1	2	99	99	157	20	99	99	1	N0	0	PD						0	2
0	1	1	64	1	66	165	24.24	99	99	11	11	6	1	2	99	99	335	100	99	99	3	N1a	1	MD						0	2
0	1	1	56	2	71	160	27.73	99	99	2	2	9	1	2	99	99	176	0	99	99	2	N0	0	MD	C	3	17	1	2011-06-16	2	3
0	1	1	60	1	53	168	18.78	99	99	11	2	10	1	2	99	99	267	0	99	99	3	N1b	2	MD						0	3
0	1	99	49	1	58	167	20.8	99	99	11	2	9	1	11	99	99	102	250	99	99	3	N2a	4	MD						0	3
0	1	1	42	1	69	175	22.53	99	99	11	11	7	1	3	99	99	303	180	99	99	3	N1a	1	MD						0	2
0	1	99	75	2	44.6	148	20.36	99	1	11	2	11	1	2	99	99	318	500	99	1	3	N1a	1	WD	C	8	51	2	2011-07-29	2	3
0	1	99	71	2	58	165	21.3	99	1	11	2	9	1	11	99	99	386	0	1	1	4	N0	0	MD						0	3
0	1	1	51	1	73	167	26.18	99	99	2	2	8	1	3	1	99	398	0	99	1	0	N0	0	MD						0	0
0	1	99	67	1	63	165	23.14	99	1	2	2	8	1	2	99	99	325	200	99	99	3	N2a	4	MD						0	3
0	1	99	70	1	58	158	23.23	1	99	2	2	8	1	2	99	99	189	0	99	99	2	N0	0	MD						0	3
0	1	99	81	1	55	168	19.49	99	99	2	2	11	1	2	1	99	261	0	99	99	3	N1a	1	MD						0	3
0	1	99	62	1	71	161	27.39	99	99	2	2	10	1	2	1	99	316	300	99	1	0	N0	0	WD						0	0
0	1	99	58	1	78	166	28.31	1	99	2	2	11	1	3	1	99	234	0	99	99	1	N0	0	MD						0	1
0	1	1	76	1	57.8	155	24.06	99	99	2	11	8	1	2	99	99	168	100	99	99	3	N1c	0	MD						0	3
0	1	1	73	2	58	155	24.14	99	1	11	2	6	1	2	99	99	200	0	99	99	2	N0	0	MD						0	3
0	1	1	76	1	69	170	23.88	99	99	2	2	6	1	2	99	99	151	500	99	99	1	N0	0	MD						0	2
0	1	99	73	2	36	151	15.79	99	99	11	3	6	1	2	99	99	173	0	99	1	1	N0	0	MD						0	2
0	1	99	74	2	64	152	27.7	99	99	2	2	7	1	2	99	99	242	100	99	99	4	N0	0	WD						0	1
0	1	1	50	1	78	169	27.31	99	1	2	2	7	1	3	99	99	438	500	99	1	3	N1a	1	WD						0	3
0	1	99	71	1	64	172	21.63	1	99	2	2	6	1	2	99	99	259	0	99	1	1	N0	0	MD						0	2
0	1	99	48	2	44	152	19.04	99	99	11	3	8	1	3	1	99	611	600	99	1	2	N0	0	MD						0	4
0	1	99	72	2	65	152	28.13	99	99	2	2	9	1	2	99	99	190	0	99	99	1	N0	0	MD						0	1
0	1	1	65	1	81.7	168	28.95	1	99	3	3	10	1	2	99	99	345	0	99	1	2	N0	0	MD	C	1	6	1	2011-07-26	2	3
0	1	99	53	2	61	153	26.06	1	1	2	2	12	1	11	99	99	429	1050	99	99	4	N0	0	Mucinous						0	3
0	1	1	50	1	50	165	18.37	99	99	11	3	13	1	2	99	99	223	0	99	99	1	N0	0	MD	C	1	7	1	2011-06-23	0	2
0	1	99	64	2	58.3	156	23.96	99	99	2	2	5	1	2	99	99	207	0	99	99	1	N0	0	MD						0	2
0	1	1	77	1	50	173	16.71	1	1	2	3	6	1	2	1	99	241	100	99	1	2	N0	0	MD						0	3
0	1	1	63	1	60	173	20.05	99	99	11	2	6	1	2	99	99	179	50	99	1	4	N2a	4	MD						0	3
0	1	1	47	1	68	184	20.09	99	99	11	11	15	1	2	99	99	304	0	99	1	3	N2a	6	MD						0	3
0	1	99	68	1	67	160	26.17	99	1	2	2	8	1	2	99	99	240	0	99	1	1	N0	0	MD						0	1
0	1	99	60	1	65	170	22.49	99	99	11	2	7	1	3	99	99	189	0	99	99	1	N0	0	MD						0	2
0	1	99	68	1	64	163	24.09	99	99	11	11	6	1	2	99	99	151	100	99	99	3	N1a	1	MD						0	2
0	1	1	69	1	68	169	23.81	99	99	11	2	6	1	11	99	99	311	500	99	1	4	N0	0	WD						0	3
0	1	99	75	2	60	158	24.03	99	99	11	2	16	1	11	99	99	281	100	99	99	3	N1b	2	PD						0	4
0	1	1	77	1	64	164	23.8	1	99	2	3	8	1	3	99	99	225	0	99	99	1	N0	0	WD						0	1
0	1	99	64	2	58	154	24.46	99	99	11	11	9	1	2	99	99	198	300	99	99	3	N1a	1	WD						0	1
0	1	1	71	1	55	167	19.72	99	99	3	2	9	1	2	1	99	303	300	99	99	0	N0	0	WD						0	0
0	1	99	66	2	57	157	23.12	99	99	11	11	11	1	2	99	99	310	0	99	99	3	N1a	1	MD						0	3
0	1	99	58	2	57	158	22.83	99	99	11	2	8	1	2	99	99	240	0	99	1	3	N1a	1	MD						0	3
0	1	99	54	1	68	160	26.56	99	99	2	3	9	1	2	1	99	471	600	99	1	0	N0	0	MD						0	0
0	1	99	54	2	57	158	22.83	99	99	11	2	8	1	3	1	99	444	200	99	99	3	N1a	1	MD						0	3
0	1	99	70	2	58	163	21.83	99	99	2	2	9	1	2	99	99	294	300	99	1	4	N2a	6	MD						0	3
0	1	99	49	2	64	164	23.8	99	99	11	3	10	1	3	1	99	436	0	99	1	1	N0	0	MD						0	2
0	1	1	59	1	75	172	25.35	99	99	2	2	8	1	2	1	99	265	0	99	99	1	N0	0	MD						0	2
0	1	99	56	1	65	161	25.08	99	99	2	2	14	1	2	99	99	413	0	99	1	1	N0	0	MD						0	2
0	1	1	64	1	61	166	22.14	1	99	3	2	7	1	3	1	99	343	180	99	1	3	N2b	9	MD						0	2
0	1	1	47	1	80	175	26.12	99	99	2	2	18	1	2	99	99	386	130	99	99	3	N2b	9	MD						0	3
0	1	1	77	1	62	168	21.97	99	99	11	3	7	1	2	1	99	345	550	99	1	1	N0	0	WD						0	2
0	1	1	35	1	86	183	25.68	99	99	2	2	14	1	3	99	99	331	500	99	1	1	N0	0	MD	C	1	3	1	2011-08-13	1	2
0	1	1	61	1	76	171	25.99	1	99	2	2	7	1	2	99	99	215	0	99	1	0	N0	0	WD						0	0
0	1	99	81	2	57	158	22.83	99	99	2	2	8	1	2	99	99	210	200	99	99	3	N1a	1	MD						0	3
0	1	99	79	1	45	168	15.94	99	99	11	2	9	1	2	99	99	250	50	99	99	2	N0	0	WD						0	3
0	1	99	52	2	54.5	155	22.68	99	1	2	11	6	1	2	99	99	112	0	99	99	1	N0	0	MD						0	1
0	1	99	55	2	60.6	160	23.67	1	99	2	2	17	1	2	99	99	313	80	99	99	3	N1a	1	WD						0	3
0	1	1	43	1	61	176	19.69	99	99	11	2	12	1	2	1	99	334	0	99	1	4	N2a	4	Mucinous						0	3
0	1	1	71	1	67.8	172	22.92	1	99	2	3	11	1	3	1	99	303	0	99	99	2	N0	0	MD						0	3
0	1	1	69	1	83	178	26.2	99	99	2	2	16	1	3	1	99	524	420	99	99	1	N0	0	MD						0	2
0	1	99	75	1	58	157	23.53	99	99	11	11	8	1	2	99	99	158	0	99	99	3	N1a	1	MD						0	3
0	1	1	72	1	72	177	22.98	99	99	11	2	12	1	11	99	99	195	200	99	99	1	N0	0	MD						0	2
0	1	1	47	2	62	160	24.22	99	1	11	2	8	1	11	99	99	422	600	99	99	4	N1b	3	MD						0	4
0	1	1	65	1	54.2	164	20.15	99	99	11	3	8	1	3	1	99	344	100	99	99	3	N1a	1	MD						0	3
0	1	99	77	1	75	176	24.21	99	99	2	2	18	1	2	99	99	215	0	1	99	2	N0	0	MD	C	1	5	1	2011-09-21	1	3
0	1	99	65	2	60	160	23.44	99	1	2	11	5	1	2	99	99	150	50	99	99	4	N2a	5	MD						0	3
0	1	99	63	1	53.5	155	22.27	1	99	2	2	5	1	2	99	99	144	0	99	1	3	N1c	0	MD						0	3
0	1	99	54	2	50	153	21.36	99	1	11	2	5	1	2	99	99	169	0	99	1	1	N0	0	MD						0	2
0	1	99	70	2	61	150	27.11	99	1	2	2	8	1	2	99	99	218	500	99	1	2	N0	0	MD						0	3
0	1	99	71	2	48	135	26.34	99	99	2	2	22	1	2	99	99	200	0	99	99	1	N0	0	WD	A	2	12	1	2011-09-19	2	1
0	1	1	63	1	56.5	167	20.26	99	99	11	2	7	1	3	1	99	292	250	99	1	2	N0	0	MD						0	3
0	1	1	44	1	55	166	19.96	99	99	11	2	12	1	3	1	99	303	230	99	1	3	N1a	1	WD						0	3
0	1	1	72	1	61	163	22.96	99	1	2	2	10	1	3	1	99	275	0	99	1	2	N0	0	MD						0	3
0	1	1	52	1	72	174	23.78	99	99	11	2	9	1	3	99	99	249	0	99	99	3	N1b	3	MD						0	2
0	1	1	56	1	77	172	26.03	1	99	2	2	12	1	11	1	99	252	350	99	1	3	N1b	2	MD						0	3
0	1	99	51	2	48	153	20.5	99	99	11	2	9	1	11	99	99	243	1200	99	99	2	N0	0	MD						0	3
0	1	1	60	1	84	178	26.51	99	99	2	2	9	1	11	99	99	159	0	99	99	2	N0	0	MD						0	3
0	1	99	41	1	53	170	18.34	99	99	11	2	15	1	2	99	99	314	700	99	1	2	N0	0	MD	C	1	3	1	2011-09-24	0	3
0	1	1	34	1	79	178	24.93	99	99	11	2	10	1	3	1	99	327	350	99	99	3	N1a	1	MD						0	2
0	1	99	71	1	80.2	177	25.6	1	99	2	2	10	1	3	99	99	419	230	99	99	1	N0	0	MD						0	2
0	1	99	44	2	51	157	20.69	99	99	11	2	10	1	2	1	99	335	100	99	1	3	N1b	2	MD						0	3
0	1	99	68	2	37	151	16.23	99	1	11	2	8	1	2	99	99	270	50	99	99	1	N0	0	WD						0	1
0	1	1	31	1	85	175	27.76	99	99	2	11	8	1	2	99	99	254	80	99	99	1	N0	0	WD						0	2
0	1	1	67	1	45	158	18.03	99	99	11	3	22	1	2	99	99	434	0	99	1	2	N0	0	WD						0	3
0	1	1	67	1	66	167	23.67	99	99	2	3	6	1	2	99	99	310	550	99	99	3	N1b	2	Signet						0	3
0	1	1	58	1	52.9	163	19.91	1	99	2	2	9	1	11	99	99	466	500	99	99	4	N1b	3	MD						0	3
0	1	1	62	1	66	169	23.11	99	99	2	3	5	1	2	99	99	170	0	99	99	1	N0	0	WD						0	2
0	1	1	68	2	55	147	25.45	99	1	2	11	5	1	11	99	99	196	80	99	99	3	N2a	4	MD						0	3
0	1	99	41	1	78	173	26.06	99	1	2	2	5	1	2	99	99	160	0	99	99	2	N0	0	Mucinous						0	3
0	1	1	59	1	72	176	23.24	99	99	2	2	15	1	11	99	99	346	750	99	99	4	N2b	16	MD	A	1	6	1	2011-10-27	2	3
0	1	1	61	1	56	175	18.29	99	99	11	2	5	1	2	99	99	177	50	99	1	2	N0	0	MD						0	3
0	1	99	52	2	56	162	21.34	99	99	11	2	5	1	3	1	99	282	0	99	99	1	N0	0	MD						0	1
0	1	99	59	1	69	175	22.53	99	99	11	2	6	1	2	1	99	179	0	99	1	1	N0	0	MD						0	2
0	1	99	38	1	69	173	23.05	99	99	11	2	11	1	2	99	99	259	0	99	1	0	N0	0	WD						0	0
0	1	99	73	2	58	153	24.78	99	1	11	2	8	1	2	99	99	302	200	99	99	1	N0	0	MD						0	2
0	1	1	70	1	60	158	24.03	99	99	11	2	13	1	11	1	99	264	500	99	1	1	N0	0	MD						0	2
0	1	99	74	2	50	148	22.83	99	99	11	2	9	1	2	99	99	254	0	99	1	0	N0	0	MD						0	0
0	1	99	75	2	48.3	152	20.91	99	99	11	3	19	1	3	1	99	420	0	99	99	1	N0	0	MD	C	2	10	1	2011-10-24	0	1
0	1	1	54	1	76.4	170	26.44	99	1	2	2	8	1	2	99	99	277	0	99	99	1	N0	0	Mucinous						0	2
0	1	99	76	2	45	151	19.74	1	99	3	2	7	1	11	99	99	227	600	1	1	2	N0	0	MD						0	3
0	1	99	49	2	57	160	22.27	99	1	2	11	12	1	2	99	99	242	200	99	99	2	N0	0	MD						0	3
0	1	1	37	2	69	153	29.48	99	99	2	2	24	1	3	99	99	370	50	99	1	0	N0	0	MD						0	0
0	1	99	64	1	70	170	24.22	99	1	11	11	5	1	2	99	99	138	100	99	99	2	N0	0	MD						0	3
0	1	99	40	2	44	159	17.4	99	99	11	2	9	1	2	99	99	280	300	99	99	1	N0	0	MD						0	2
0	1	99	56	2	58	157	23.53	99	99	2	2	16	1	2	99	99	380	0	99	99	1	N0	0	MD	C	1	5	1	2011-11-15	1	2
0	1	1	78	1	63	153	26.91	99	99	2	2	8	1	2	1	99	380	1500	99	1	1	N0	0	MD						0	1
0	1	99	53	1	80	174	26.42	99	99	2	11	5	1	2	99	99	166	0	99	1	3	N1b	2	MD						0	3
0	1	99	63	1	80	163	30.11	99	1	2	2	9	1	2	1	99	443	200	99	1	2	N0	0	WD						0	3
0	1	99	60	1	60	170	20.76	99	99	2	3	7	1	3	99	99	181	0	99	99	1	N0	0	MD						0	1
0	1	1	50	1	87	173	29.07	99	99	2	2	6	1	3	1	99	279	0	99	99	1	N0	0	MD						0	2
0	1	1	69	1	59	166	21.16	99	99	2	2	7	1	2	99	99	320	500	99	1	3	N1b	2	MD						0	3
0	1	99	68	2	57	144	27.11	99	99	2	3	8	1	2	99	99	251	50	99	1	1	N0	0	WD						0	1
0	1	99	72	1	62	163	23.34	99	99	2	2	8	1	3	99	99	323	200	99	99	1	N0	0	MD						0	2
0	1	1	63	1	67	172	22.65	99	99	2	3	6	1	2	99	99	233	50	99	99	1	N0	0	MD						0	2
0	1	99	51	2	68	160	26.56	99	1	2	2	13	1	2	99	99	198	100	99	1	3	N1a	1	MD	A	4	23	1	2011-12-14	2	3
0	1	1	45	1	65	169	22.76	99	99	11	2	8	1	3	99	99	223	60	99	1	2	N0	0	MD						0	3
0	1	1	65	1	59	172	19.94	99	99	11	2	5	1	2	99	99	151	0	99	99	3	N1b	2	MD						0	2
0	1	1	60	1	57	162	21.72	99	99	11	2	28	1	3	99	99	221	0	99	99	2	N0	0	MD	C	1	4	1	2011-11-27	1	3
0	1	99	50	1	75	175	24.49	99	99	11	2	6	1	2	99	99	143	0	99	99	1	N0	0	MD						0	1
0	1	1	65	1	68.5	173	22.89	1	99	2	2	5	1	2	99	99	195	0	99	99	3	N2a	4	MD						0	3
0	1	99	54	1	71	172	24	99	99	11	11	7	1	2	99	99	170	100	99	99	1	N0	0	MD						0	2
0	1	1	67	1	70	170	24.22	99	1	2	2	15	1	3	99	99	278	0	99	1	2	N0	0	MD	B	2	14	1	2011-12-12	2	3
0	1	1	74	1	63	172	21.3	1	99	2	3	17	1	2	99	99	243	200	99	99	1	N0	0	WD						0	2
0	1	1	44	1	70	168	24.8	99	99	11	3	7	1	2	99	99	353	700	99	1	1	N0	0	WD						0	2
0	1	99	40	2	50	160	19.53	99	99	11	2	7	1	2	99	99	235	0	99	1	2	N0	0	MD	C	8	51	2	2012-01-25	2	3
0	1	99	50	2	61	157	24.75	99	99	11	2	55	1	2	99	99	542	800	99	1	4	N0	0	MD	C	1	6	1	2011-12-15	1	2
0	1	1	63	1	61	170	21.11	99	99	11	2	8	1	3	99	99	274	0	99	99	3	N1a	1	MD						0	2
0	1	1	68	1	58	164	21.56	99	1	2	2	8	1	2	99	99	284	300	99	99	1	N0	0	MD						0	2
0	1	99	55	2	69	159	27.29	99	1	2	3	7	1	3	1	99	291	0	99	1	2	N0	0	MD						0	3
0	1	99	73	2	59	157	23.94	99	99	2	2	7	1	2	1	99	257	300	99	99	3	N1b	2	MD	C	2	13	1	2011-12-29	2	3
0	1	99	61	2	39	138	20.19	1	1	2	2	9	1	11	99	1	281	350	99	1	4	N1b	3	WD						0	2
0	1	1	58	1	68	171	23.26	99	99	2	3	8	1	2	1	99	270	0	99	99	1	N0	0	WD						0	1
0	1	99	31	2	60	154	25.3	99	99	2	2	14	1	11	99	99	384	800	99	1	4	N1a	1	MD						0	1
0	1	99	67	1	53	174	17.51	99	1	11	2	10	1	11	99	99	189	450	99	1	4	N1b	2	MD	C	2	14	1	2012-02-09	2	3
0	1	99	58	1	76	172	25.69	99	99	2	2	7	1	2	99	99	144	0	99	99	1	N0	0	MD						0	1
0	1	1	55	1	56	172	18.93	99	99	11	2	7	1	2	1	99	310	150	99	1	3	N1b	3	MD						0	3
0	1	99	62	1	70	175	22.86	99	1	2	2	8	1	2	1	99	315	70	99	99	0	N0	0	MD						0	0
0	1	1	53	1	65	170	22.49	99	99	2	2	7	1	2	99	99	195	200	99	99	3	N2b	7	MD						0	3
0	1	1	45	1	67	177	21.39	99	1	2	11	7	1	3	99	99	214	0	99	99	2	N0	0	MD						0	3
0	1	1	49	1	72	171	24.62	99	99	11	2	8	1	2	1	99	291	300	99	1	0	N0	0	MD						0	0
0	1	1	53	1	76	171	25.99	99	99	2	11	20	1	11	99	99	334	200	99	1	4	N2a	4	MD						0	3
0	1	1	57	1	80	170	27.68	99	99	2	11	6	1	3	99	99	309	0	99	99	1	N0	0	MD						0	2
0	1	1	62	1	73	165	26.81	1	99	2	2	6	1	2	99	99	228	110	99	99	3	N1b	3	MD						0	3
0	1	99	78	2	60	155	24.97	1	99	2	2	11	1	2	1	99	295	100	99	99	3	N1a	1	MD						0	2
0	1	1	51	1	75	174	24.77	99	1	11	2	6	1	2	99	99	172	300	99	99	2	N0	0	MD						0	3
0	1	1	53	1	67	168	23.74	99	99	2	2	6	1	3	99	99	169	100	99	1	1	N0	0	MD						0	2
0	1	99	74	2	58.6	145	27.87	99	99	2	2	19	1	2	99	99	195	200	99	99	3	N1a	1	MD						0	1
0	1	99	56	2	60	164	22.31	99	1	11	11	5	1	2	99	99	135	0	99	99	3	N2b	10	MD						0	3
0	1	1	57	1	80	176	25.83	99	99	2	2	5	1	2	99	99	224	0	99	99	1	N0	0	MD						0	1
0	1	99	75	1	55	160	21.48	99	99	11	2	9	1	2	99	99	169	300	99	1	2	N0	0	MD						0	3
0	1	99	74	2	51	142	25.29	99	99	2	2	5	1	2	99	99	152	200	99	99	1	N0	0	MD						0	2
0	1	1	70	1	56	159	22.15	99	1	11	2	5	1	2	99	99	129	0	99	99	1	N0	0	MD						0	1
0	1	99	64	2	64	158	25.64	99	99	2	2	5	1	2	99	99	156	0	99	99	1	N0	0	MD						0	1
0	1	1	66	1	70	167	25.1	99	99	2	2	6	1	2	99	99	255	200	99	99	1	N0	0	WD						0	1
0	1	99	70	1	60	164	22.31	99	99	2	2	6	1	2	99	99	250	0	99	99	1	N0	0	Mucinous						0	1
0	1	99	48	2	60	155	24.97	99	99	11	11	7	1	2	99	99	168	0	99	99	1	N0	0	MD						0	1
0	1	99	52	2	47	153	20.08	99	99	11	2	6	1	2	99	99	210	0	99	1	3	N1b	2	MD						0	3
0	1	99	67	1	74	168	26.22	99	99	2	11	11	1	2	99	99	395	500	99	99	2	N0	0	MD						0	3
0	1	99	60	2	54	152	23.37	99	99	11	2	7	1	3	99	99	291	0	99	1	1	N0	0	MD						0	2
0	1	99	56	2	44	158	17.63	99	1	2	2	21	1	11	99	99	218	550	99	1	2	N0	0	WD	B	2	10	1	2012-02-23	2	3
0	1	99	65	1	58	158	23.23	99	99	11	11	6	1	2	99	99	245	100	99	99	1	N0	0	MD						0	2
0	1	99	40	2	45	155	18.73	99	99	11	2	9	1	2	99	99	207	200	99	99	1	N0	0	WD						0	2
0	1	1	62	1	84	179	26.22	1	99	2	2	6	1	2	99	99	291	270	99	99	2	N0	0	MD						0	3
0	1	1	62	1	63	170	21.8	99	99	2	2	8	1	3	99	99	259	0	99	99	1	N0	0	MD						0	1
0	1	1	55	1	87	178	27.46	99	99	2	2	8	1	2	1	99	299	500	99	99	1	N0	0	MD						0	2
0	1	99	44	1	78	178	24.62	99	99	11	2	6	1	3	1	99	268	0	99	1	3	N1a	1	MD						0	2
0	1	99	69	1	76	162	28.96	1	99	2	2	5	1	3	99	99	264	0	99	99	3	N1a	1	MD						0	2
0	1	99	55	1	58	165	21.3	99	99	2	11	5	1	2	99	99	113	0	99	99	1	N0	0	MD						0	2
0	1	1	71	1	49.1	157	19.92	1	99	2	2	9	1	11	99	99	396	650	99	1	4	N2b	7	MD						0	3
0	1	99	61	2	51.6	153	22.04	99	99	11	11	8	1	2	99	99	146	100	99	99	2	N0	0	MD						0	3
0	1	99	28	2	54	167	19.36	99	1	11	3	9	1	2	1	1	372	600	99	99	1	N0	0	WD						0	1
0	1	1	56	1	72	170	24.91	99	99	11	2	16	1	2	99	99	406	500	99	1	2	N0	0	MD	C	1	6	1	2012-02-12	1	3
0	1	99	65	2	55	164	20.45	99	99	11	2	7	1	2	99	99	179	300	99	99	3	N1b	2	MD						0	2
0	1	99	77	2	61	145	29.01	99	99	2	2	11	1	11	99	99	442	500	99	1	4	N1b	2	MD						0	3
0	1	1	45	1	78	175	25.47	99	99	2	2	16	1	3	99	99	370	50	99	99	1	N0	0	MD						0	1
0	1	99	62	1	57.5	165	21.12	99	99	11	11	7	1	2	99	99	228	0	99	99	3	N1a	1	MD						0	3
0	1	99	79	1	57	170	19.72	99	99	11	2	13	1	2	99	99	417	300	99	99	1	N0	0	MD						0	2
0	1	99	71	2	49	159	19.38	99	1	11	2	7	1	2	99	99	265	0	99	99	2	N0	0	MD						0	3
0	1	99	64	2	63	163	23.71	99	99	11	2	6	1	2	99	99	245	400	99	99	1	N0	0	MD						0	1
0	1	1	59	1	74	172	25.01	99	1	2	11	9	1	2	99	99	178	0	99	99	2	N0	0	MD						0	3
0	1	99	60	1	78	168	27.64	1	99	2	2	25	1	2	99	99	224	0	99	1	0	N0	0	MD						0	0
0	1	99	47	1	68	165	24.98	99	99	11	11	7	1	2	99	99	284	0	99	1	1	N0	0	MD						0	2
0	1	99	37	2	48	161	18.52	99	1	11	3	7	1	3	1	99	276	0	99	1	1	N0	0	MD						0	2
0	1	99	77	1	66.7	168	23.63	1	99	2	11	9	1	11	1	99	334	320	99	99	4	N1b	2	MD						0	3
0	1	99	67	1	74	162	28.2	1	99	3	3	7	1	2	1	99	320	0	99	1	0	N0	0	MD						0	0
0	1	1	63	1	60	160	23.44	99	99	11	2	8	1	3	1	99	403	200	99	1	1	N0	0	MD	C	6	39	2	2012-05-08	2	2
0	1	1	50	1	87	177	27.77	99	1	2	2	12	1	11	1	99	486	780	99	1	4	N1a	1	MD						0	3
0	1	99	58	2	52	154	21.93	99	99	3	11	6	1	3	99	99	222	0	99	99	3	N1a	1	MD						0	4
0	1	99	55	1	60	169	21.01	99	99	11	2	7	1	11	99	99	151	100	99	1	3	N1a	1	Mucinous						0	3
0	1	1	62	1	70	158	28.04	99	99	2	2	14	1	2	99	99	170	0	99	1	2	N0	0	MD	C	4	22	1	2012-03-28	0	3
0	1	1	67	1	64	172	21.63	99	99	2	2	8	1	2	99	99	167	0	99	99	1	N0	0	MD						0	1
0	1	99	38	2	49	160	19.14	99	99	11	3	6	1	3	99	99	215	0	99	1	1	N0	0	PD						0	2
0	1	1	52	1	58	174	19.16	99	99	11	2	17	1	3	1	99	189	0	99	99	1	N0	0	MD	C	1	6	1	2012-04-02	0	2
0	1	99	63	1	76	175	24.82	99	99	11	2	7	1	2	99	99	376	100	99	1	1	N0	0	MD	C	3	18	1	2012-03-20	2	2
0	1	99	70	2	61.5	148	28.08	1	99	2	11	8	1	2	99	99	551	0	99	99	2	N0	0	MD						0	3
0	1	99	66	2	46.7	155	19.44	99	99	3	2	7	1	2	99	99	285	500	99	1	3	N1b	2	MD						0	2
0	1	1	61	1	52	162	19.81	1	99	2	2	9	1	2	99	99	305	300	99	1	3	N1b	2	MD	C	3	18	1	2012-04-10	2	3
0	1	1	59	1	80	173	26.73	99	99	3	2	20	1	11	99	99	430	80	99	1	4	N1b	2	MD						0	3
0	1	99	49	2	51	158	20.43	99	99	11	2	7	1	2	99	99	347	150	99	1	0	N0	0	MD						0	0
0	1	99	87	1	55	155	22.89	99	99	2	2	7	1	2	99	99	154	0	99	1	1	N0	0	MD						0	2
0	1	1	72	1	64	165	23.51	99	99	2	2	7	1	2	99	99	243	500	99	99	1	N0	0	MD						0	2
0	1	99	83	2	54	159	21.36	1	99	2	2	5	1	2	99	99	198	0	99	1	3	N1a	1	MD						0	3
0	1	99	59	2	50	142	24.8	1	99	2	2	7	1	2	99	99	292	100	99	99	1	N0	0	MD						0	2
0	1	1	57	1	63	164	23.42	99	99	11	2	8	1	3	99	99	281	150	99	1	1	N0	0	MD						0	2
0	1	1	73	1	58	163	21.83	99	99	2	2	12	1	3	99	99	285	350	99	99	3	N1a	1	MD						0	3
0	1	1	65	1	69.9	168	24.77	99	1	11	3	7	1	3	1	99	307	500	99	99	1	N0	0	WD						0	1
0	1	99	75	2	70	158	28.04	1	1	2	3	5	1	11	1	99	260	200	99	1	3	N1a	1	MD						0	3
0	1	99	50	2	57	156	23.42	1	99	2	2	6	1	11	99	99	189	50	99	1	0	N0	0	PD						0	0
0	1	1	69	1	58	158	23.23	99	99	2	2	6	1	2	1	99	195	0	99	1	2	N0	0	MD						0	3
0	1	99	48	2	56	159	22.15	99	99	11	3	6	1	3	1	99	441	600	99	1	2	N0	0	MD						0	3
0	1	99	55	2	52	164	19.33	99	99	11	11	5	1	2	99	99	108	50	99	99	1	N0	0	MD						0	2
0	1	1	48	1	68.5	172	23.15	99	99	11	2	5	1	2	1	99	170	0	99	99	3	N1a	1	MD						0	3
0	1	99	62	2	46	149	20.72	99	99	11	2	15	1	11	99	99	132	0	99	99	3	N1a	1	MD	C	2	8	1	2012-05-02	2	3
0	1	99	54	2	64.2	166	23.3	99	99	11	3	22	1	2	1	99	185	0	99	99	1	N0	0	MD						0	2
0	1	99	77	1	75	174	24.77	99	99	2	2	7	1	2	99	99	317	180	99	1	2	N0	0	MD						0	3
0	1	99	46	2	62	151	27.19	99	99	2	2	7	1	11	99	99	162	150	99	1	0	N0	0	MD						0	0
0	1	1	59	1	80	172	27.04	1	1	2	2	9	1	11	99	99	161	150	99	99	1	N0	0	MD						0	2
0	1	1	48	1	81	173	27.06	99	99	2	2	7	1	3	1	99	362	50	99	1	2	N0	0	WD						0	3
0	1	1	72	1	70	168	24.8	99	99	2	11	8	1	2	1	99	278	1500	99	99	2	N0	0	MD	C	4	27	1	2012-05-27	2	3
0	1	99	57	1	69	172	23.32	99	99	11	2	10	1	3	1	99	455	600	99	1	3	N1b	2	MD	C	5	30	1	2012-05-30	2	2
0	1	1	75	1	57	167	20.44	1	99	2	11	14	1	11	99	99	400	600	99	99	4	N0	0	MD						0	3
0	1	99	64	1	80	167	28.69	99	99	2	2	16	1	11	99	99	498	1250	99	1	4	N2a	4	MD	A	2	13	1	2012-05-21	2	3
0	1	99	68	2	48	148	21.91	99	99	2	3	7	1	2	1	99	197	0	99	99	1	N0	0	WD						0	1
0	1	99	53	1	64	168	22.68	99	99	11	2	7	1	3	1	99	266	200	99	1	2	N0	0	MD						0	3
0	1	1	69	1	67	172	22.65	99	1	2	2	10	1	3	1	99	258	0	99	99	1	N0	0	MD						0	2
0	1	99	39	1	70	168	24.8	99	99	11	2	6	1	3	99	99	208	0	99	99	3	N1a	1	MD						0	1
0	1	1	57	1	65	176	20.98	99	99	2	11	27	1	11	1	99	198	220	1	1	2	N0	0	MD						0	3
0	1	99	53	1	76	177	24.26	99	99	11	11	8	1	2	99	99	464	600	99	99	4	N2a	4	MD						0	3
0	1	1	61	1	81	162	30.86	99	99	2	2	11	1	2	99	99	278	200	99	99	1	N0	0	MD						0	1
0	1	99	55	1	120	178	37.87	1	99	2	2	78	1	11	1	99	284	570	99	1	2	N0	0	PD						0	3
0	1	99	78	2	52	150	23.11	99	99	2	2	16	1	2	99	99	294	300	99	1	3	N1a	1	PD						0	3
0	1	1	52	1	56	160	21.88	99	99	11	2	9	1	11	99	99	270	300	99	99	1	N0	0	MD						0	1
0	1	1	50	1	68	171	23.26	99	99	11	2	57	1	2	99	99	214	0	99	99	1	N0	0	WD	C	1	7	1	2012-05-28	1	1
0	1	1	47	1	78	182	23.55	99	99	11	2	6	1	2	99	99	136	100	99	1	0	N0	0	WD	C	7	45	2	2012-07-06	2	0
0	1	1	78	1	41.4	163	15.58	99	99	11	2	6	1	2	99	99	101	0	99	99	2	N0	0	MD						0	3
0	1	1	66	1	69.7	164	25.6	99	99	2	2	10	1	2	1	99	344	200	99	99	1	N0	0	WD						0	1
0	1	1	66	1	77.1	162	29.38	99	99	3	2	9	1	3	1	99	338	150	99	99	3	N1b	2	MD						0	3
0	1	1	63	1	63	171	21.55	99	99	11	2	8	1	11	99	99	428	1600	99	1	4	N1b	3	MD	C	3	19	1	2012-06-12	2	3
0	1	1	37	1	69.6	171	23.8	99	99	11	2	16	1	11	99	99	149	100	99	99	4	N1b	2	MD	C	1	4	1	2012-05-28	1	3
0	1	99	74	2	47	154	19.82	1	99	2	3	9	1	2	1	99	243	100	99	1	1	N0	0	MD						0	2
0	1	99	58	1	65.6	171	22.43	99	99	11	11	10	1	2	99	99	242	150	99	1	2	N0	0	MD						0	3
0	1	99	60	1	83	178	26.2	1	99	2	2	7	1	11	1	99	284	300	1	1	1	N0	0	MD						0	2
0	1	1	66	1	47	159	18.59	99	1	11	2	16	1	11	1	1	618	800	1	1	4	N1b	2	MD						0	3
0	1	99	65	2	55	164	20.45	99	99	11	11	10	1	11	99	99	226	50	99	1	4	N1b	2	MD						0	3
0	1	1	46	1	61	177	19.47	1	99	2	2	7	1	3	99	99	219	0	99	99	1	N0	0	MD						0	1
0	1	1	53	1	66	165	24.24	99	99	11	2	12	1	2	99	99	219	0	99	99	0	N0	0	WD						0	0
0	1	99	50	1	62	173	20.72	99	99	11	11	9	1	3	99	99	291	100	99	1	3	N1b	2	WD						0	3
0	1	99	49	1	56	165	20.57	1	1	3	2	11	1	2	1	99	139	10	99	99	1	N0	0	WD						0	1
0	1	1	39	1	85	178	26.83	99	99	2	11	5	1	3	99	99	210	100	99	99	2	N0	0	MD						0	3
0	1	1	52	1	62	165	22.77	99	99	11	2	5	1	2	99	99	110	0	99	99	1	N0	0	MD						0	2
0	1	99	67	1	83	172	28.06	1	99	2	11	14	1	2	1	99	224	0	99	99	1	N0	0	MD	C	5	31	2	2012-07-09	2	2
0	1	1	69	1	51	160	19.92	99	99	11	11	9	1	11	99	99	269	500	99	1	4	N1b	9	MD						0	3
0	1	1	48	1	72	168	25.51	99	99	2	11	16	1	2	99	99	308	0	99	1	1	N0	0	WD	C	1	2	1	2012-06-13	1	2
0	1	1	40	1	70	178	22.09	1	99	3	11	42	1	11	99	99	133	3700	99	99	4	N1b	2	MD	C	1	4	1	2012-06-15	0	3
0	1	99	83	1	72	180	22.22	99	99	2	11	18	1	2	99	99	172	0	99	99	4	N2b	7	MD	C	1	5	1	2012-06-19	2	3
0	1	1	48	2	71	160	27.73	99	99	2	11	5	1	3	99	99	276	200	99	1	3	N1a	1	MD						0	3
0	1	99	69	1	57	168	20.2	99	99	2	2	12	1	2	1	99	214	0	99	1	3	N1a	1	MD						0	3
0	1	1	54	1	67.1	171	22.95	99	99	11	2	7	1	3	99	99	250	0	99	1	3	N1b	2	WD						0	2
0	1	99	54	1	50	166	18.14	99	99	11	2	11	1	2	1	99	268	700	99	1	2	N0	0	MD						0	3
0	1	99	65	2	59	160	23.05	99	99	2	2	6	1	2	1	99	205	100	99	99	1	N0	0	MD						0	1
0	1	1	64	1	46	172	15.55	99	99	11	2	9	1	11	99	99	232	50	99	99	3	N1b	3	MD						0	4
0	1	99	45	2	49	149	22.07	99	99	11	11	9	1	2	99	99	260	100	99	99	3	N2b	12	MD						0	4
0	1	99	63	1	57.9	170	20.03	1	99	2	2	6	1	2	1	99	163	10	99	1	0	N0	0	MD						0	0
0	1	99	63	1	70	169	24.51	99	99	2	2	7	1	2	1	99	234	150	99	1	0	N0	0	WD						0	0
0	1	99	49	2	59	158	23.63	99	1	11	11	10	1	2	99	99	290	100	99	1	4	N0	0	MD						0	0
0	1	99	51	2	52	158	20.83	99	99	11	2	8	1	11	99	99	145	1600	99	99	4	N0	0	MD						0	3
0	1	1	67	1	65	176	20.98	99	99	11	2	7	1	2	1	99	182	50	99	99	2	N0	0	MD						0	3
0	1	1	56	1	67	166	24.31	99	99	2	3	6	1	2	1	99	153	0	99	1	0	N0	0	MD						0	0
0	1	99	54	1	63	166	22.86	99	99	2	11	7	1	2	99	99	139	100	99	99	1	N0	0	MD						0	1
0	1	99	72	2	52	158	20.83	99	99	2	2	24	1	2	1	1	247	4	99	1	2	N0	0	MD	C	10	65	2	2012-09-19	2	3
0	1	99	65	2	67	157	27.18	99	99	2	2	6	1	2	99	99	147	50	99	1	0	N0	0	MD						0	0
0	1	1	65	1	58	155	24.14	99	99	11	11	6	1	11	99	99	116	100	1	99	3	N1b	3	MD						0	3
0	1	1	71	1	62	166	22.5	1	99	2	2	8	1	2	1	99	302	200	99	1	2	N0	0	MD	C	9	63	2	2012-09-24	2	3
0	1	99	63	2	42	156	17.26	99	1	11	2	5	1	2	99	99	102	50	99	99	1	N0	0	MD						0	2
0	1	1	54	1	64	169	22.41	1	99	2	2	6	1	3	99	99	280	200	99	99	1	N0	0	WD						0	1
0	1	99	78	2	43	140	21.94	99	1	2	3	8	1	3	1	99	308	450	99	1	1	N0	0	MD						0	2
0	1	99	66	1	62	169	21.71	99	99	2	2	7	1	2	99	99	202	50	99	1	1	N0	0	MD						0	2
0	1	99	62	1	55	168	19.49	99	99	2	2	10	1	3	99	99	271	200	99	1	3	N1b	2	MD						0	3
0	1	99	60	1	61	163	22.96	99	1	11	11	9	1	11	99	99	481	400	99	99	4	N0	0	MD						0	3
0	1	99	69	2	55	159	21.76	99	99	11	11	9	1	3	99	99	304	50	99	99	4	N1a	1	MD						0	4
0	1	99	55	1	70	170	24.22	99	99	2	11	11	1	11	99	1	349	500	99	1	4	N1b	2	MD						0	3
0	1	99	60	2	55	155	22.89	99	99	11	2	6	1	2	1	99	200	100	99	99	1	N0	0	MD						0	2
0	1	1	71	1	64	161	24.69	1	99	3	11	10	1	2	1	99	196	30	99	99	3	N2a	5	MD						0	3
0	1	99	65	1	64.5	164	23.98	99	99	11	3	5	1	3	1	99	253	50	99	1	1	N0	0	MD						0	2
0	1	1	64	1	73	170	25.26	99	99	2	11	5	1	2	99	99	157	50	99	99	3	N1a	1	MD						0	3
0	1	99	60	2	46	145	21.88	1	99	2	2	9	1	11	99	99	216	150	99	99	4	N2a	4	MD						0	2
0	1	99	63	1	63	164	23.42	99	1	2	2	7	1	2	1	99	168	30	99	1	1	N0	0	MD						0	1
0	1	99	69	2	54.2	158	21.71	99	99	2	2	5	1	2	99	99	112	30	99	1	2	N0	0	MD						0	3
0	1	1	71	1	74	170	25.61	99	99	2	2	5	1	2	1	99	200	50	99	1	1	N0	0	MD						0	1
0	1	99	56	1	78	172	26.37	99	99	2	2	6	1	2	1	99	244	0	99	1	2	N0	0	MD						0	3
0	1	99	53	1	71	162	27.05	99	99	2	2	5	1	2	1	99	190	0	99	99	1	N0	0	WD						0	1
0	1	99	45	2	75	151	32.89	99	99	2	2	9	1	11	1	99	185	0	99	1	2	N0	0	MD						0	3
0	1	1	57	1	52	164	19.33	1	99	2	11	17	1	2	1	99	426	900	99	1	3	N2b	10	MD						0	3
0	1	99	55	2	67	155	27.89	99	99	2	11	33	1	2	99	99	170	180	99	99	2	N0	0	MD	C	1	5	1	2012-08-27	2	3
0	1	1	77	1	50	157	20.28	1	99	2	2	91	1	2	1	99	584	650	99	1	4	N0	0	MD						0	1
0	1	99	43	2	57	158	22.83	99	99	11	11	6	1	2	99	1	273	0	99	99	3	N1b	3	MD						0	3
0	1	99	70	2	52	150	23.11	99	99	2	2	5	1	2	99	99	144	50	99	99	1	N0	0	MD						0	1
0	1	99	47	2	55.2	156	22.68	99	99	11	2	4	1	2	1	99	216	200	99	1	3	N1b	2	WD						0	3
0	1	99	73	1	64	165	23.51	99	99	2	2	17	1	3	1	99	344	0	99	99	3	N2b	13	MD						0	3
0	1	99	69	2	56.7	156	23.3	1	99	2	2	7	1	2	1	99	261	0	99	1	2	N0	0	MD						0	3
0	1	1	69	1	61.5	172	20.79	99	99	11	11	15	1	2	99	99	156	0	99	99	1	N0	0	WD						0	1
0	1	99	82	2	50	155	20.81	99	99	3	11	5	1	2	99	99	112	250	99	99	2	N0	0	MD						0	3
0	1	99	52	2	63	160	24.61	99	99	11	11	5	1	3	99	99	294	100	99	1	3	N2b	10	MD						0	3
0	1	99	62	1	53	162	20.2	99	99	11	2	8	1	3	99	99	313	600	99	1	2	N0	0	MD						0	3
0	1	99	55	1	68	173	22.72	1	99	2	2	4	1	2	1	99	179	200	99	1	1	N0	0	MD						0	2
0	1	99	47	1	71	172	24	99	1	11	11	8	1	3	99	99	286	20	99	1	3	N2a	4	PD						0	3
0	1	1	36	1	50.5	164	18.78	99	99	2	2	6	1	11	1	99	161	200	99	1	3	N2a	4	Mucinous						0	3
0	1	99	70	1	72.7	177	23.21	99	99	2	11	8	1	2	1	99	165	0	99	1	0	N0	0	MD						0	0
0	1	99	67	2	55	147	25.45	1	99	3	2	8	1	2	1	99	347	300	99	99	1	N0	0	MD						0	1
0	1	1	35	2	52	160	20.31	99	99	11	2	8	1	3	99	99	240	100	99	99	3	N2a	5	MD						0	3
0	1	99	70	2	52	147	24.06	1	99	2	11	7	1	2	99	99	323	200	99	99	3	N1b	2	MD						0	3
0	1	99	51	1	67	168	23.74	99	99	2	11	20	1	11	1	99	586	300	99	99	4	N2b	20	MD						0	3
0	1	99	54	1	71.4	165	26.23	99	99	2	11	7	1	2	99	99	201	540	99	99	0	N0	0	WD						0	0
0	1	99	53	2	72.5	156	29.79	99	99	2	11	5	1	2	99	99	145	100	99	99	3	N1b	2	MD						0	3
0	1	99	45	2	39	153	16.66	99	99	2	11	7	1	11	99	99	202	500	99	99	3	N1b	3	MD						0	4
0	1	99	75	2	50	143	24.45	1	1	2	11	13	1	3	99	99	244	0	99	99	2	N0	0	MD						0	3
0	1	99	61	2	65	152	28.13	99	1	2	2	5	1	2	99	99	215	200	99	99	3	N1a	1	MD						0	2
0	1	99	59	1	65	170	22.49	99	99	2	3	7	1	2	99	99	98	200	99	99	3	N1a	1	WD	C	2	9	1	2012-10-31	2	2
0	1	99	64	1	61	163	22.96	99	99	11	2	10	1	2	99	99	143	0	99	99	3	N1c	0	MD						0	2
0	1	1	69	1	63	170	21.8	1	99	3	2	10	1	11	1	99	284	200	99	99	4	N1b	3	WD						0	3
0	1	99	66	2	50	155	20.81	99	1	2	3	15	1	11	99	1	292	500	1	1	4	N0	0	MD						0	2
0	1	99	63	1	78	175	25.47	99	99	2	3	10	1	2	1	99	262	250	99	1	3	N1a	1	MD						0	3
0	1	1	66	1	70	163	26.35	1	99	2	2	9	1	2	99	99	245	400	99	99	2	N0	0	MD						0	3
0	1	99	53	2	45	158	18.03	99	99	11	11	7	1	3	99	99	220	50	99	99	2	N0	0	MD						0	3
0	1	1	64	1	50	158	20.03	99	99	11	11	8	1	11	99	99	127	0	99	1	2	N0	0	MD						0	3
0	1	99	78	2	54.3	158	21.75	99	99	11	2	8	1	2	99	99	279	200	99	99	3	N1b	2	WD						0	2
0	1	99	49	1	59	165	21.67	99	99	11	2	8	1	2	99	99	296	300	99	99	3	N2a	4	PD						0	3
0	1	99	84	2	43	143	21.03	99	99	2	2	7	1	2	99	99	193	200	99	99	2	N0	0	MD						0	3
0	1	99	43	1	67.2	175	21.94	99	99	11	2	6	1	2	99	99	247	100	99	1	0	N0	0	MD						0	0
0	1	1	51	1	68	166	24.68	99	99	11	2	7	1	2	99	99	294	50	99	99	1	N0	0	WD						0	1
0	1	1	50	1	68	168	24.09	99	99	11	11	5	1	3	99	99	183	100	99	99	1	N0	0	MD						0	2
0	1	99	62	2	50.3	155	20.94	99	99	11	3	7	1	3	1	99	276	200	99	1	1	N0	0	MD						0	2
0	1	1	32	1	73	175	23.84	99	99	11	3	7	1	2	1	99	305	200	99	99	1	N0	0	MD						0	2
0	1	99	65	2	67	159	26.5	1	1	2	2	8	1	2	1	99	336	400	99	1	3	N1b	2	MD						0	3
0	1	1	68	1	62	165	22.77	1	99	2	11	5	1	2	99	99	147	100	99	99	2	N0	0	WD						0	3
0	1	1	63	1	63	164	23.42	99	99	2	2	6	1	2	1	99	180	200	99	99	2	N0	0	MD						0	3
0	1	99	56	2	55.5	155	23.1	99	99	11	2	7	1	2	1	99	371	300	99	99	1	N0	0	MD						0	1
0	1	1	59	1	72	176	23.24	99	99	2	11	7	1	2	99	99	273	100	99	99	1	N0	0	WD						0	1
0	1	99	43	1	62	180	19.14	99	99	11	2	6	1	2	99	99	140	150	99	99	1	N0	0	WD						0	1
0	1	99	59	2	56	155	23.31	1	99	2	11	5	1	2	99	99	179	0	99	99	1	N0	0	MD						0	1
0	1	99	48	1	59	169	20.66	99	99	11	11	13	1	3	99	99	204	300	99	99	1	N0	0	WD	C	1	4	1	2012-11-30	2	1
0	1	99	60	1	55	163	20.7	99	99	11	2	9	1	3	99	99	230	350	99	1	2	N0	0	MD	B	3	21	1	2012-12-17	2	3
0	1	99	61	1	57	153	24.35	99	99	2	2	7	1	2	99	99	98	0	99	99	3	N1a	1	MD						0	3
0	1	99	77	1	51	160	19.92	99	99	2	11	8	1	2	1	99	179	100	99	99	1	N0	0	MD						0	1
0	1	99	64	2	70	165	25.71	1	99	2	3	5	1	2	99	99	122	0	99	99	1	N0	0	MD						0	1
0	1	99	69	1	51	160	19.92	99	99	2	11	7	1	11	99	99	86	0	99	1	3	N1a	1	MD						0	3
0	1	99	71	1	56	166	20.32	99	99	11	2	22	1	2	1	99	271	2300	99	99	1	N0	0	WD	C	1	5	1	2012-12-11	0	1
0	1	99	68	1	63	167	22.59	99	99	11	3	8	1	3	1	99	399	300	99	1	2	N0	0	MD						0	3
0	1	99	53	1	65	170	22.49	99	99	11	11	6	1	3	99	99	202	400	99	99	1	N0	0	MD						0	1
0	1	99	66	1	58	168	20.55	99	99	11	2	8	1	2	99	99	120	30	99	99	1	N0	0	WD						0	2
0	1	99	43	2	57.5	155	23.93	99	99	11	3	5	1	3	99	99	210	0	99	1	3	N1a	1	MD						0	2
0	1	99	73	2	55	155	22.89	99	99	2	2	7	1	3	1	99	263	50	99	1	2	N0	0	MD						0	3
0	1	99	63	2	67.2	160	26.25	99	99	2	2	7	1	2	99	99	135	300	99	1	1	N0	0	WD						0	2
0	1	99	50	2	41	145	19.5	99	99	11	2	7	1	2	1	99	233	50	99	1	1	N0	0	MD						0	2
0	1	99	47	2	57	166	20.69	99	1	11	2	8	1	3	99	99	291	150	99	1	1	N0	0	MD						0	2
0	1	99	63	1	65	163	24.46	99	99	2	11	15	1	11	1	99	603	1100	99	99	4	N0	0	MD						0	0
0	1	99	34	2	59	170	20.42	99	99	11	2	7	1	3	99	99	207	100	99	1	0	N0	0	MD						0	0
0	1	99	56	2	49	154	20.66	99	1	2	11	7	1	2	99	99	236	200	99	1	3	N1a	1	Mucinous						0	3
0	1	99	66	1	76	166	27.58	99	99	2	2	8	1	3	99	99	362	500	99	1	4	N0	0	MD						0	3
0	1	1	60	1	53	165	19.47	99	99	2	11	11	1	2	99	99	495	600	99	1	4	N2a	4	MD						0	0
0	1	99	62	2	51	162	19.43	99	99	11	11	7	1	2	99	99	104	0	99	99	1	N0	0	WD						0	1
0	1	99	62	1	64.5	169	22.58	99	99	2	11	16	1	3	99	99	308	500	99	1	0	N0	0	Signet						0	0
0	1	99	52	1	79	174	26.09	99	99	2	11	7	1	3	99	99	331	0	99	99	1	N0	0	MD						0	2
0	1	99	46	2	45	157	18.26	99	1	11	3	8	1	3	99	99	361	0	99	99	0	N0	0	MD						0	0
0	1	99	34	1	70	184	20.68	99	99	11	2	6	1	3	99	99	297	0	99	99	1	N0	0	MD						0	2
0	1	99	84	2	44	155	18.31	99	99	2	2	18	1	2	99	99	176	150	99	99	1	N0	0	MD						0	1
0	1	99	72	1	64	162	24.39	1	99	3	2	10	1	3	99	99	173	150	99	99	3	N1a	1	MD						0	2
0	1	99	70	1	57.9	170	19.92	99	1	2	2	8	1	11	99	99	145	300	99	99	2	N0	0	MD						0	3
0	1	1	68	1	62	160	24.22	99	99	11	3	7	1	2	99	99	247	50	99	1	0	N0	0	MD						0	0
0	1	1	74	1	81	175	26.45	1	99	2	2	15	1	11	99	99	200	600	99	99	3	N1b	2	MD						0	3
0	1	1	71	1	83	170	28.72	99	99	2	2	23	1	11	99	99	302	550	99	99	3	N2b	13	mucinous	C	2	9	1	2011-06-02	2	3
0	1	1	77	2	38.8	142	19.27	99	99	2	2	21	1	11	99	99	400	1900	99	99	2	N0	0	WD						0	4
0	1	1	61	1	58	164	21.56	99	1	2	2	6	1	3	99	99	406	0	99	99	3	N1b	2	MD						0	3
0	1	99	62	1	54	158	21.63	99	99	3	11	11	1	11	99	99	276	100	99	99	1	N0	0	MD						0	1
0	1	99	82	2	50	150	22.22	99	99	2	2	19	1	11	99	99	215	500	99	99	2	N0	0	MD						0	3
0	1	99	66	1	68	170	23.53	1	99	2	2	11	1	11	99	99	192	0	99	99	1	N0	0	MD						0	1
0	1	99	63	1	66	173	22.05	99	99	3	3	10	1	3	99	99	325	0	99	1	2	N0	0	MD						0	3
0	1	99	63	2	65	154	27.41	1	99	2	2	15	1	3	99	99	244	200	99	99	3	N1a	1	MD						0	2
0	1	1	63	1	67.8	177	21.71	99	99	2	3	14	1	3	99	99	302	300	99	99	2	N0	0	MD						0	3
0	1	99	59	1	47	160	18.36	99	99	2	3	39	1	11	99	99	529	600	99	1	4	N1b	3	MD						0	3
0	1	1	62	1	66	155	27.47	99	99	11	2	26	1	11	99	99	400	600	99	99	3	N1b	3	MD						0	3
0	1	99	71	1	62	164	23.05	99	99	2	2	9	1	3	99	99	166	50	99	99	3	N1b	3	mucinous						0	2
0	1	99	75	1	51	154	21.53	99	99	11	2	7	1	3	99	99	230	150	99	99	0	N0	0	WD						0	0
0	1	99	61	2	64.9	158	25.87	99	99	2	11	16	1	2	99	99	262	250	99	99	3	N2b	13	MD	A	1	3	1	2008-10-03	2	3
0	1	1	83	1	55	165	20.2	99	99	2	11	32	1	11	99	1	553	900	99	99	2	N0	0	MD						0	3
0	1	99	59	1	61	163	22.96	99	99	11	2	16	1	11	99	1	490	3000	99	99	4	N1b	2	MD						0	4
0	1	99	71	2	66	156	27.12	1	1	2	2	17	1	11	99	99	165	0	99	99	2	N0	0	MD						0	3
0	1	99	39	2	43	159	17.01	99	99	11	2	12	1	3	99	99	175	0	99	99	1	N0	0	MD						0	1
0	1	99	71	1	65	171	22.23	99	99	2	3	9	1	11	99	1	335	650	99	99	3	N1a	1	MD						0	2
0	1	99	71	1	67	157	27.18	99	99	11	2	18	1	11	99	99	265	500	99	99	3	N1a	1	MD						0	2
0	1	1	65	1	73.5	161	28.29	1	1	2	2	10	1	11	99	99	159	0	99	99	1	N0	0	WD						0	2
0	1	99	74	2	47	140	23.98	99	99	11	11	9	1	11	99	99	169	400	99	99	2	N0	0	MD						0	3
0	1	99	75	2	62	146	28.93	99	99	2	11	25	1	11	99	99	210	500	99	99	3	N2b	15	MD						0	3
0	1	99	60	2	54	163	20.32	99	99	11	11	16	1	11	99	99	415	1800	99	99	1	N0	0	MD						0	2
0	1	1	43	1	71	170	24.57	99	99	2	2	14	1	11	99	99	305	0	99	99	4	N0	0	MD						0	3
0	1	99	34	2	57	163	21.45	99	99	11	2	19	1	11	99	99	200	0	99	99	2	N0	0	PD						0	3
0	1	99	55	1	70	168	24.8	99	99	11	3	17	1	11	99	99	270	900	99	99	1	N0	0	mucinous						0	2
0	1	99	55	1	84.6	180	26.11	99	1	2	11	31	1	11	99	99	260	300	99	99	3	N2a	6	MD						0	3
0	1	1	62	1	50	160	19.53	99	99	11	3	16	1	11	99	99	230	700	99	1	2	N0	0	MD						0	3
0	1	99	63	1	55	163	20.7	99	99	2	2	17	1	11	99	99	185	0	99	99	1	N0	0	WD						0	2
0	1	99	57	1	57	156	23.42	99	99	11	11	9	1	2	99	99	330	250	99	99	1	N0	0	MD						0	1
0	1	99	69	2	55	151	24.12	1	99	2	2	28	1	11	99	99	350	1000	99	99	1	N0	0	WD						0	2
0	1	1	56	1	58.5	157	23.73	99	99	11	11	20	1	11	99	99	240	1900	99	99	2	N0	0	MD						0	3
0	1	99	33	2	50	162	19.05	99	99	11	11	8	1	3	99	99	147	0	99	99	2	N0	0	MD						0	3
0	1	99	61	2	60	162	22.86	99	1	2	2	12	1	11	99	99	175	100	99	99	1	N0	0	WD						0	1
0	1	99	75	2	54	154	22.77	99	99	2	2	17	1	11	99	1	245	0	99	99	2	N0	0	MD						0	3
0	1	1	65	1	56	161	21.6	99	99	2	11	18	1	11	99	99	285	1100	99	99	4	N1a	1	MD						0	4
0	1	99	63	1	62	171	21.2	99	1	11	2	10	1	11	99	99	120	500	99	99	1	N0	0	MD						0	1
0	1	99	74	1	55.2	166	20.03	99	99	3	11	5	1	2	99	99	200	150	99	99	3	N1a	1	MD						0	3
0	1	99	63	1	53	172	17.92	99	99	11	3	15	1	11	99	99	250	800	99	1	2	N0	0	MD						0	4
0	1	99	44	2	53.1	159	21.06	99	1	11	3	17	1	3	99	99	360	500	99	1	0	N0	0	MD						0	0
0	1	99	75	2	61	160	23.71	1	99	2	3	25	1	11	99	99	441	300	99	99	4	N1b	2	WD						0	2
0	1	99	72	1	67.6	169	23.7	1	1	3	2	18	1	11	99	1	345	500	99	99	4	N1b	3	WD						0	3
0	1	99	50	1	67	171	22.91	99	99	2	11	17	1	11	99	99	115	0	99	99	1	N0	0	MD						0	2
0	1	99	66	1	76.6	161	29.55	99	99	2	11	18	1	11	99	99	120	0	99	99	3	N1a	1	MD						0	3
0	1	99	37	1	73	166	26.49	99	99	11	11	9	1	2	99	99	370	0	99	99	1	N0	0	WD						0	2
0	1	1	49	1	65	163	24.46	99	99	2	2	20	1	11	99	99	230	0	99	99	2	N0	0	MD						0	3
0	1	99	65	1	57.5	167	20.62	99	99	2	2	14	1	11	99	99	225	100	99	99	2	N0	0	MD						0	3
0	1	99	67	1	68	166	24.77	99	99	11	11	12	1	2	99	99	170	0	99	99	3	N1a	1	MD						0	2
0	1	99	64	2	50	150	22.22	99	99	11	2	17	1	11	99	1	195	400	99	99	1	N0	0	WD						0	1
0	1	1	73	1	56	168	19.91	99	99	2	3	6	1	3	99	99	340	500	99	99	3	N1b	3	MD						0	2
0	1	1	68	1	75.8	168	26.95	99	99	3	11	19	1	11	99	99	145	300	99	99	2	N0	0	MD						0	3
0	1	1	72	1	75.2	168	26.58	99	99	2	2	19	1	11	99	99	220	510	99	99	1	N0	0	MD						0	2
0	1	99	69	1	79	163	29.73	1	99	3	11	17	1	11	99	99	285	1800	99	99	4	N2a	4	WD						0	3
0	1	1	36	1	52	168	18.42	99	99	2	2	36	1	11	99	99	270	80	99	99	1	N0	0	WD						0	1
0	1	99	58	1	66.5	168	23.56	99	99	11	11	17	1	11	99	99	165	100	99	99	1	N0	0	WD						0	2
0	1	1	65	1	50.2	168	17.85	1	1	2	11	14	1	11	99	1	278	600	99	99	3	N2b	21	mucinous						0	4
0	1	99	71	1	54.9	163	20.66	99	99	11	11	23	1	11	99	99	135	300	99	99	2	N0	0	MD						0	3
0	1	99	45	2	51	153	21.79	99	1	11	11	17	1	11	99	99	545	1700	99	99	3	N1a	1	MD						0	3
0	1	99	69	2	56.2	154	23.85	99	1	2	3	17	1	11	99	99	314	50	99	1	2	N0	0	MD						0	3
0	1	99	69	1	72	170	24.91	99	99	2	11	3	1	2	99	99	239	0	99	99	1	N0	0	MD						0	2
0	1	99	69	1	55	158	21.89	99	99	2	2	12	1	3	99	99	430	200	99	99	2	N0	0	MD						0	3
0	1	1	49	1	62	178	19.57	99	1	2	11	11	1	2	99	99	147	100	99	99	2	N0	0	WD						0	3
0	1	99	51	1	62.3	166	22.61	99	99	11	2	16	1	11	99	99	214	600	99	99	2	N0	0	MD						0	3
0	1	99	66	1	60	162	22.86	99	1	11	2	14	1	2	99	99	223	0	99	99	0	N0	0	WD	C	1	4	1	2012-03-02	1	0
0	1	1	74	1	66.5	160	26.11	99	99	2	11	12	1	3	99	99	189	0	99	99	2	N0	0	MD						0	3
0	1	1	51	1	80	168	28.45	99	99	2	2	21	1	11	99	99	324	650	99	1	2	N0	0	WD						0	3
0	1	99	52	1	64	160	25	1	99	2	11	19	1	11	99	99	240	0	99	99	1	N0	0	MD						0	2
0	1	99	53	2	62.5	160	24.41	99	99	2	11	15	1	11	99	1	380	650	99	99	4	N2b	11	WD						0	3
0	1	1	82	2	62.5	154	26.42	99	99	11	11	53	1	3	99	99	296	0	99	99	1	N0	0	MD						0	1
0	1	99	62	2	57	147	26.23	99	99	3	3	24	1	11	99	99	190	500	99	99	1	N0	0	MD						0	2
0	1	99	72	1	68.3	165	25	1	99	2	11	6	1	2	99	1	314	0	99	99	2	N0	0	MD						0	3
0	1	99	76	1	68.2	165	25.08	1	99	2	11	6	1	2	99	99	217	30	99	99	1	N0	0	MD						0	2
0	1	99	59	1	70	168	24.8	1	99	2	2	19	1	11	99	99	243	1200	99	99	3	N1a	1	WD						0	3
0	1	1	68	1	78	166	28.31	99	99	2	2	20	1	11	99	99	205	100	99	99	1	N0	0	MD						0	2
0	1	99	81	2	55	150	24.44	99	99	2	2	25	1	11	99	99	360	600	99	99	3	N2b	14	MD						0	3
0	1	99	62	1	70	171	23.94	99	1	11	11	18	1	11	99	99	285	0	99	99	2	N0	0	WD						0	3
0	1	99	52	1	59	170	20.42	99	99	11	11	19	1	11	99	99	190	0	99	99	2	N0	0	MD						0	3
0	1	99	67	1	65	168	23.03	99	99	11	2	11	1	11	99	1	556	1000	99	99	4	N0	0	MD						0	2
0	1	99	52	1	82.8	171	28.22	99	99	2	2	7	1	3	99	99	249	140	99	99	1	N0	0	MD						0	1
0	1	99	49	2	78	173	26.06	99	1	2	11	15	1	11	99	99	225	500	99	99	1	N0	0	MD						0	2
0	1	99	66	1	50.6	152	22.02	99	1	11	11	13	1	11	99	99	635	2050	99	99	4	N2a	5	mucinous						0	4
0	1	99	68	1	73	165	26.81	99	1	2	11	9	1	11	99	99	189	0	99	99	2	N0	0	WD						0	3
0	1	1	60	1	61.9	161	23.88	99	1	2	11	10	1	3	99	99	227	300	99	99	3	N1b	2	WD						0	1
0	1	99	66	1	64	167	22.95	99	99	11	11	14	1	3	99	99	156	0	99	99	2	N0	0	MD						0	3
0	1	1	52	1	69.6	180	21.48	99	99	11	2	21	1	11	99	99	261	1350	99	1	3	N2b	15	MD						0	3
0	1	1	63	1	61.2	161	23.52	99	1	2	3	20	1	11	99	99	290	800	99	1	3	N2a	5	MD						0	3
0	1	99	53	1	85	174	28.08	1	1	2	2	26	1	11	99	99	355	400	99	99	0	N0	0	WD						0	0
0	1	1	57	1	56.2	160	22.06	99	99	2	2	20	1	3	99	99	202	0	99	99	2	N0	0	MD						0	3
0	1	1	54	1	65	163	24.46	99	99	11	2	8	1	3	99	99	214	0	99	99	3	N1b	2	MD						0	3
0	1	1	66	1	60.7	167	21.82	99	99	2	11	7	1	3	99	99	158	0	99	99	3	N2a	4	MD						0	3
0	1	1	59	1	66	178	20.83	99	99	2	11	18	1	11	99	99	105	100	99	99	2	N0	0	MD						0	3
0	1	1	53	1	64	173	21.38	99	99	2	11	16	1	2	99	99	210	100	99	99	4	N2b	13	MD						0	3
0	1	1	68	1	78	178	24.62	99	99	2	11	13	1	2	99	99	255	400	99	99	3	N1a	1	WD						0	1
0	1	99	70	1	55	163	20.7	1	99	2	2	47	1	11	99	99	345	0	99	99	2	N0	0	WD						0	3
0	1	99	75	1	69.3	167	24.85	1	99	11	11	14	1	11	99	99	256	700	99	99	2	N0	0	WD						0	3
0	1	1	63	1	85	168	30.12	99	99	2	11	18	1	11	99	99	210	500	99	99	2	N0	0	MD						0	3
0	1	99	45	2	46.3	154	19.52	99	99	11	2	18	1	11	99	99	161	0	99	1	4	N1a	1	MD						0	4
0	1	99	61	1	64.9	163	24.43	99	99	11	11	30	1	11	99	99	342	300	99	99	4	N1a	1	MD						0	4
0	1	99	61	1	60	165	22.04	99	99	11	3	19	1	11	99	1	415	300	99	99	3	N2a	4	MD						0	3
0	1	99	72	2	45	152	19.48	99	1	11	2	15	1	11	99	99	472	3850	99	99	4	N2b	13	WD						0	3
0	1	99	58	1	64.1	162	24.42	99	99	11	2	22	1	11	99	99	350	500	99	99	2	N0	0	MD						0	3
0	1	99	55	1	52	168	18.42	99	99	2	3	18	1	11	99	99	309	1000	99	1	4	N0	0	MD						0	3
0	1	99	71	2	61.1	149	27.52	99	99	2	11	22	1	2	99	99	180	0	99	99	2	N0	0	MD						0	3
0	1	1	70	1	52	162	19.81	99	99	2	3	14	1	11	99	99	273	500	99	99	1	N0	0	WD						0	1
0	1	99	65	2	75	156	30.86	99	99	2	3	34	1	11	99	99	418	1600	99	99	1	N0	0	MD						0	2
0	1	99	43	1	75	177	23.94	99	99	2	11	17	1	11	99	99	244	100	99	99	2	N0	0	WD						0	3
0	1	99	84	2	51	150	22.67	1	99	2	2	20	1	11	99	99	99	150	99	99	2	N0	0	MD						0	3
0	1	99	69	2	68	154	28.67	99	99	2	3	17	1	11	99	99	331	0	99	99	3	N1a	6	MD						0	3
0	1	99	54	1	57	167	20.44	99	99	11	11	17	1	11	99	99	170	0	99	99	3	N2b	7	MD						0	3
0	1	99	66	2	55.6	146	25.98	99	99	11	2	18	1	11	99	99	205	0	99	99	3	N1b	2	MD	A	7	45	2	2007-05-28	2	3
0	1	1	52	1	59	161	22.76	1	99	11	2	14	1	2	99	99	313	850	99	99	3	N1b	2	MD						0	3
0	1	99	68	2	62	151	27.19	99	1	11	2	47	1	11	99	99	291	450	99	99	3	N1b	2	MD						0	4
0	1	99	55	1	70	170	24.22	99	99	2	2	26	1	11	99	99	264	0	99	99	1	N0	0	WD						0	1
0	1	1	57	1	62	162	23.62	99	99	2	11	13	1	2	99	99	234	150	99	99	1	N0	0	MD						0	1
0	1	99	77	2	38	150	16.89	99	1	2	3	13	1	11	99	99	263	600	99	99	3	N1b	2	MD						0	3
0	1	1	47	1	62	168	21.97	99	99	11	2	30	1	2	99	99	215	400	99	99	2	N0	0	WD						0	3
0	1	99	58	1	73	176	23.49	99	99	2	2	7	1	3	99	99	203	100	99	99	2	N0	0	mucinous						0	3
0	1	99	71	2	55.6	151	24.29	99	99	2	11	15	1	3	99	99	646	700	99	99	4	N0	0	WD						0	3
0	1	1	45	1	54	164	20.08	99	99	11	2	14	1	3	99	99	322	0	99	99	3	N2a	5	MD						0	3
0	1	99	62	1	66.8	165	24.45	99	1	2	3	7	1	2	99	99	280	0	99	99	1	N0	0	MD						0	2
0	1	99	73	1	68	166	24.68	99	99	2	2	31	1	3	99	99	173	200	99	99	1	N0	0	mucinous	C	1	7	1	2007-07-13	2	2
0	1	99	66	2	56	152	24.24	99	99	2	11	7	1	2	99	99	288	0	99	99	2	N0	0	MD						0	4
0	1	99	45	1	55	162	20.96	99	99	11	2	9	1	3	99	99	410	0	99	99	1	N0	0	WD	C	3	15	1	2007-09-13	2	1
0	1	99	69	2	51.8	160	20.18	99	99	11	2	10	1	3	99	99	165	50	99	99	1	N0	0	MD						0	1
0	1	1	53	2	57.9	166	20.99	99	99	11	11	5	1	3	99	99	282	300	99	99	3	N1a	1	MD						0	2
0	1	1	60	1	53	157	21.5	1	99	11	2	23	1	11	99	99	481	650	99	1	3	N2b	7	MD						0	3
0	1	99	68	2	69.5	152	30.08	99	1	2	2	7	1	3	99	99	310	400	99	99	1	N0	0	MD						0	2
0	1	99	72	1	67	162	25.53	1	1	2	11	14	1	2	99	1	295	500	99	99	2	N0	0	MD						0	3
0	1	99	70	1	63	162	23.86	99	1	2	11	9	1	3	99	99	230	300	99	99	3	N1a	1	MD						0	3
0	1	99	59	2	56	159	22.15	99	99	11	11	8	1	3	99	99	357	500	99	99	1	N0	0	WD						0	1
0	1	99	60	1	69.3	171	23.7	99	99	11	11	7	1	2	99	99	272	150	99	99	3	N2b	12	MD						0	4
0	1	99	65	1	59.2	162	22.47	1	99	2	2	22	1	3	99	99	345	0	99	99	2	N0	0	MD						0	3
0	1	1	71	1	88	174	29.2	1	99	2	11	12	1	2	99	99	168	100	99	99	1	N0	0	WD						0	2
0	1	99	56	2	69	161	26.72	99	99	2	11	7	1	3	99	99	190	500	99	99	1	N0	0	WD						0	1
0	1	1	68	2	54.8	151	24.16	99	99	2	11	8	1	2	99	99	308	200	99	99	4	N2a	6	MD						0	4
0	1	99	60	2	56	150	24.89	99	1	2	2	6	1	2	99	99	245	100	99	99	3	N1b	2	MD						0	3
0	1	99	55	2	86.5	158	34.65	99	1	2	2	7	1	3	99	1	385	200	99	99	2	N0	0	MD						0	3
0	1	99	59	1	65.8	169	22.96	99	99	2	11	7	1	3	99	99	222	0	99	99	3	N2a	4	MD						0	3
0	1	99	53	2	72	155	30.05	99	99	2	2	6	1	2	99	99	245	100	99	99	1	N0	0	WD	C	2	12	1	2008-04-22	2	1
0	1	1	53	1	69.1	177	21.98	99	99	11	11	6	1	3	99	99	334	0	99	99	2	N0	0	MD						0	4
0	1	99	61	1	58	173	19.38	99	99	2	11	27	1	11	99	99	563	2600	99	1	3	N1b	2	mucinous						0	3
0	1	99	79	1	65	170	22.49	99	1	2	2	8	1	3	99	99	315	200	99	99	4	N1b	2	MD						0	4
0	1	99	45	2	64	158	25.64	99	99	2	11	8	1	3	99	99	230	150	99	99	1	N0	0	MD						0	1
0	1	1	63	1	66	157	26.78	99	99	11	11	7	1	3	99	1	198	150	99	99	1	N0	0	WD						0	1
0	1	1	56	1	77	167	27.61	99	99	11	11	8	1	3	99	99	275	50	99	99	2	N0	0	MD						0	3
0	1	99	56	2	55	150	24.44	99	1	2	11	7	1	3	99	99	278	0	99	99	3	N1b	2	MD						0	3
0	1	99	59	2	46.5	146	21.7	99	99	11	11	10	1	2	99	99	274	600	99	99	4	N0	0	MD						0	3
0	1	99	72	1	62	159	24.52	99	99	2	2	8	1	3	99	99	208	50	99	99	3	N1b	3	MD						0	3
0	1	99	66	2	45	148	20.54	99	99	11	11	7	1	3	99	99	277	500	99	99	3	N1a	3	MD						0	3
0	1	99	72	2	60	150	26.67	99	99	2	3	10	1	2	99	99	270	50	99	99	1	N0	0	WD						0	1
0	1	99	61	1	62.7	173	20.97	99	99	2	11	10	1	3	99	1	260	300	99	99	1	N0	0	WD						0	2
0	1	99	77	2	43.4	148	19.76	99	1	2	3	9	1	3	99	99	307	0	99	99	1	N0	0	MD						0	1
0	1	99	63	1	78	167	27.97	99	1	2	2	14	1	11	99	99	130	250	99	99	2	N0	0	MD						0	3
0	1	99	41	2	46	153	19.6	99	99	11	3	10	1	3	99	99	187	100	99	99	3	N1b	3	MD						0	3
0	1	99	70	1	55.9	170	19.41	99	99	2	2	8	1	3	99	99	214	0	99	99	4	N2b	13	MD						0	3
0	1	1	48	1	53.8	168	18.99	99	99	11	2	11	1	11	99	99	216	250	99	99	1	N0	0	WD						0	1
0	1	1	68	1	60.6	163	22.89	99	99	11	2	23	1	11	99	99	224	0	99	99	3	N1a	1	MD						0	4
0	1	99	66	1	71	176	22.79	99	1	11	2	8	1	3	99	99	235	0	99	99	0	N0	0	WD						0	0
0	1	99	69	2	58.9	153	25.13	99	99	2	11	7	1	3	99	99	168	0	99	99	2	N0	0	MD						0	3
0	1	99	66	2	57.2	152	24.69	99	99	3	3	7	1	3	99	99	320	100	99	1	0	N0	0	MD						0	0
0	1	1	52	1	68.2	168	24.22	99	99	11	11	7	1	3	99	99	296	200	99	99	2	N0	0	MD						0	3
0	1	99	33	2	60.6	164	22.48	99	1	11	3	9	1	11	99	99	331	900	99	1	3	N2a	4	MD						0	3
0	1	1	64	1	74.5	173	24.89	99	99	11	3	10	1	3	99	1	380	250	99	1	2	N0	0	MD						0	3
0	1	99	53	1	59.9	171	20.41	99	99	11	2	16	1	11	99	99	279	300	99	99	3	N1a	1	MD						0	4
0	1	1	68	1	65	166	23.67	99	99	2	2	17	1	11	99	99	261	400	99	99	3	N1a	1	MD						0	3
0	1	99	40	2	53	157	21.45	99	1	11	2	10	1	11	99	99	226	250	99	99	1	N0	0	MD						0	2
0	1	1	70	1	67.2	176	21.64	99	99	11	2	11	1	11	99	99	273	100	99	99	2	N0	0	MD						0	3
0	1	99	61	2	62.8	158	25.03	99	99	11	2	10	1	3	99	99	227	60	99	99	3	N2b	9	MD						0	4
0	1	1	26	1	77.6	180	24.03	99	99	11	11	8	1	3	99	99	224	50	99	99	1	N0	0	MD						0	2
0	1	1	56	1	61.5	168	21.69	99	99	2	2	9	1	3	99	99	250	0	99	99	2	N0	0	MD						0	3
0	1	99	57	2	69.1	153	29.44	1	99	2	11	9	1	11	99	99	209	0	99	99	1	N0	0	WD						0	2
0	1	99	73	2	57.7	146	26.99	99	99	2	2	5	1	2	99	99	209	0	99	99	1	N0	0	MD						0	2
0	1	99	54	2	75.1	159	29.59	99	99	2	11	18	1	11	99	99	191	0	99	99	2	N0	0	MD						0	3
0	1	1	40	1	53	166	19.23	99	99	11	2	9	1	3	99	99	171	0	99	99	1	N0	0	WD						0	1
0	1	1	68	1	66	164	24.54	99	99	11	2	7	1	3	99	99	185	50	99	99	2	N0	0	MD						0	3
0	1	1	73	1	78	165	28.65	99	1	2	2	22	1	2	99	99	410	160	99	99	1	N0	0	MD	C	1	6	1	2012-02-23	2	1
0	1	99	40	2	60.1	154	25.21	99	1	11	2	7	1	3	99	99	336	0	99	99	3	N2b	10	MD						0	2
0	1	99	68	1	59.5	165	21.85	99	99	11	2	8	1	3	99	99	198	0	99	99	3	N1a	1	WD						0	1
0	1	99	62	2	48	148	21.91	99	99	11	2	16	1	11	99	99	195	400	99	99	3	N2a	5	MD						0	3
0	1	99	70	1	63	162	24.06	99	99	11	2	16	1	11	99	99	358	3000	99	1	2	N0	0	MD						0	3
0	1	99	61	2	68	163	25.72	99	99	2	2	14	1	11	99	99	320	270	99	99	4	N0	0	MD						0	3
0	1	99	56	2	56.2	156	23	99	99	11	11	11	1	3	99	99	161	50	99	99	2	N0	0	MD						0	3
0	1	1	77	1	78	170	26.99	99	1	11	2	7	1	3	99	99	264	0	99	99	3	N2a	4	MD						0	3
0	1	99	56	2	58.9	155	24.61	99	99	2	2	15	1	11	99	1	200	100	99	99	3	N1b	2	MD						0	2
0	1	99	51	2	54.6	149	24.63	99	1	11	2	8	1	3	99	99	184	0	99	99	1	N0	0	WD						0	1
0	1	99	62	2	55.8	148	25.58	99	99	2	2	7	1	3	99	99	195	0	99	99	2	N0	0	MD						0	3
0	1	99	77	1	43.8	161	16.81	99	1	11	2	81	1	11	99	99	233	1100	99	99	3	N1b	3	PD	C	6	37	2	2010-05-12	2	4
0	1	99	63	2	52.8	147	24.33	99	1	11	2	30	1	3	99	99	177	0	99	99	2	N0	0	MD						0	3
0	1	99	74	2	66.7	151	29.41	99	99	2	2	12	1	11	99	99	293	620	99	99	2	N0	0	MD						0	3
0	1	1	61	1	70	168	24.8	99	99	2	3	7	1	3	99	99	362	0	99	1	1	N0	0	MD						0	2
0	1	1	65	1	67.4	171	22.97	99	99	2	2	10	1	3	99	99	231	0	99	99	1	N0	0	MD						0	2
0	1	1	75	1	57	161	21.99	1	99	3	2	33	1	11	99	99	202	100	99	99	1	N0	0	MD						0	2
0	1	99	72	2	54	149	24.32	99	99	11	11	10	1	11	99	99	231	700	99	1	2	N0	0	MD						0	3
0	1	1	70	1	101	189	28.27	99	99	2	11	10	1	3	99	99	229	0	99	99	1	N0	0	WD						0	1
0	1	1	66	1	66.8	165	24.57	1	99	11	11	29	1	11	99	99	207	0	99	99	2	N0	0	MD						0	3
0	1	99	63	2	37.6	148	17.14	99	99	11	2	11	1	3	99	1	398	0	99	99	3	N1a	1	MD						0	3
0	1	1	69	1	61	163	22.85	99	99	11	2	10	1	11	99	99	270	400	99	99	3	N2b	13	MD						0	3
0	1	99	37	1	66.5	176	21.47	99	99	11	11	9	1	3	99	99	222	0	99	99	2	N0	0	MD						0	3
0	1	99	59	2	54.8	155	22.81	99	1	2	2	8	1	3	99	99	204	0	99	99	3	N1b	2	MD						0	3
0	1	1	74	1	54	167	19.36	99	99	11	3	11	1	11	99	99	261	1000	99	99	2	N0	0	MD						0	3
0	1	99	52	2	81	158	32.45	1	1	2	2	26	1	11	99	99	290	450	99	99	3	N1b	3	MD						0	3
0	1	99	64	1	63	170	21.8	99	1	11	11	23	1	11	99	1	277	250	99	99	2	N0	0	MD						0	3
0	1	1	64	1	61	163	22.96	1	99	2	2	121	1	11	99	1	304	600	99	99	3	N1b	2	MD	B	1	7	1	2010-07-15	2	3
0	1	1	70	1	65	170	22.49	1	1	2	2	21	1	11	99	99	225	0	99	99	3	N2b	9	MD						0	3
0	1	99	64	1	55	160	21.48	99	99	11	11	17	1	11	99	99	402	340	99	99	4	N2a	5	MD						0	3
0	1	99	61	1	60.5	163	22.69	99	1	2	11	31	1	11	99	99	224	350	99	99	3	N2b	9	MD						0	3
0	1	99	48	2	56.3	155	23.43	99	1	11	11	8	1	3	99	99	156	0	99	99	3	N1b	3	MD						0	3
0	1	1	56	1	59	172	20.06	99	99	11	2	20	1	11	99	99	320	300	99	99	2	N0	0	MD						0	3
0	1	1	38	1	60	170	20.76	99	99	11	2	9	1	11	99	99	215	610	99	99	4	N2a	5	MD						0	3
0	1	99	76	1	62.1	168	22.13	99	99	11	2	23	1	11	99	99	256	500	99	99	3	N2a	5	MD						0	4
0	1	1	52	1	67.1	180	20.71	99	99	11	11	30	1	3	99	99	239	260	99	99	2	N0	0	MD	C	2	12	1	2010-10-18	2	3
0	1	1	68	2	46.8	156	19.35	99	99	11	11	12	1	11	99	1	238	100	99	99	3	N2a	4	PD						0	3
0	1	99	45	2	60	163	22.58	99	99	11	2	15	1	3	99	99	226	90	99	99	3	N1b	2	MD						0	3
0	1	1	57	1	77	168	27.28	99	99	11	2	8	1	3	99	1	189	100	99	99	2	N0	0	MD						0	3
0	1	1	59	1	67	165	24.61	99	99	2	2	34	1	11	99	99	304	200	99	99	1	N0	0	MD						0	1
0	1	99	68	1	70	158	28.04	99	99	2	2	8	1	3	99	99	229	0	99	99	3	N1a	1	MD						0	2
0	1	1	49	1	54	165	19.74	99	99	11	3	16	1	11	99	99	270	650	99	1	1	N0	0	MD						0	1
0	1	1	52	1	83.1	180	25.68	99	99	2	2	22	1	3	99	99	220	0	99	99	2	N0	0	MD	C	1	5	1	2010-11-14	1	3
0	1	1	55	2	61.1	156	25.27	99	99	2	11	9	1	3	99	1	194	0	99	99	4	N2a	4	MD						0	4
0	1	99	66	2	60	159	23.73	99	99	11	2	10	1	3	99	99	243	100	99	99	3	N1a	1	MD						0	3
0	1	99	39	1	81	176	26.03	99	99	11	11	10	1	3	99	99	201	500	99	99	1	N0	0	MD						0	1
0	1	1	73	1	66	167	23.67	1	99	11	2	53	1	11	99	1	236	210	99	99	3	N2a	4	MD						0	3
0	1	99	68	1	65.6	162	24.9	1	99	3	11	19	1	11	99	99	285	600	99	99	2	N0	0	MD						0	3
0	1	99	72	2	61.2	149	27.49	99	1	2	11	25	1	11	99	1	357	510	99	99	1	N0	0	MD						0	1
0	1	1	61	1	77	174	25.43	99	99	11	11	10	1	3	99	1	431	1100	99	99	3	N1b	2	MD						0	3
0	1	1	60	1	71	171	24.22	99	99	11	2	19	1	11	99	99	295	100	99	99	1	N0	0	MD						0	2
0	1	99	76	1	63.2	177	20.17	99	1	2	11	28	1	3	99	1	243	600	99	99	1	N0	0	WD						0	1
0	1	99	59	1	71	163	26.72	99	99	11	11	8	1	3	99	99	241	500	99	99	3	N2b	9	MD						0	3
0	1	99	46	1	84	173	28.07	99	99	2	11	7	1	2	99	99	196	100	99	99	1	N0	0	MD						0	1
0	1	1	58	1	68.1	164	25.2	99	99	2	2	74	1	11	99	99	542	650	99	99	4	N2a	4	MD						0	4
0	1	1	70	1	77.6	179	24.33	99	99	2	3	13	1	3	99	99	272	270	99	1	0	N0	0	WD						0	0
0	1	1	73	1	69.6	164	26.04	99	99	11	2	10	1	3	99	99	237	0	99	99	1	N0	0	MD						0	1
0	1	99	49	1	64	166	23.23	99	99	11	2	11	1	3	99	99	196	0	99	99	1	N0	0	MD						0	2
0	1	99	63	1	51.1	155	21.21	99	99	2	2	25	1	11	99	99	446	2600	99	1	3	N2a	4	MD						0	3
0	1	99	45	2	72.5	158	29.15	99	1	2	2	14	1	3	99	99	334	200	99	99	3	N1b	2	MD						0	3
0	1	99	53	1	70.7	161	27.14	99	99	11	11	14	1	2	99	99	221	100	99	99	3	N1b	2	MD						0	3
0	1	1	54	1	57	164	21.19	99	99	11	11	8	1	3	99	99	140	200	99	99	3	N2a	4	MD						0	3
0	1	99	64	2	60	152	25.8	99	1	2	2	16	1	11	99	99	366	350	99	99	3	N2a	5	MD						0	3
0	1	99	64	2	64.3	160	25.12	99	99	2	3	11	1	3	99	99	202	100	99	99	1	N0	0	MD						0	2
0	1	99	53	2	53	165	19.47	1	99	2	2	16	1	11	99	99	235	50	99	99	3	N2b	11	MD						0	3
0	1	99	54	1	67.7	162	25.76	99	99	11	11	8	1	3	99	99	150	0	99	99	1	N0	0	MD						0	2
0	1	99	57	1	70	162	26.67	99	1	11	11	11	1	2	99	99	622	2350	99	99	4	N0	0	MD						0	3
0	1	99	75	2	54.6	154	22.9	99	99	11	2	10	1	3	99	99	175	50	99	99	2	N0	0	MD						0	4
0	1	99	62	2	57	155	23.73	99	99	11	11	7	1	3	99	99	186	0	99	99	3	N1b	2	MD						0	2
0	1	99	82	1	56.2	160	21.95	99	99	11	2	14	1	3	99	99	222	0	99	99	3	N2b	16	MD						0	4
0	1	1	67	1	59.3	159	23.4	99	99	2	2	23	1	11	99	99	387	500	99	1	4	N0	0	MD						0	3
0	1	99	55	2	42.5	150	18.84	99	99	11	2	8	1	3	99	99	187	200	99	99	0	N0	0	WD						0	0
0	1	1	65	1	67.9	170	23.49	99	99	2	11	17	1	11	99	99	275	250	99	1	0	N0	0	MD						0	0
0	1	99	66	1	67.6	174	22.33	99	1	2	2	29	1	11	99	99	220	800	99	1	3	N1b	3	MD	C	1	4	1	2011-09-30	1	3
0	1	99	60	2	58	162	22.1	99	1	2	11	9	1	3	99	99	171	50	99	99	3	N1b	3	MD						0	3
0	1	99	74	1	77.1	166	28.11	99	99	2	2	14	1	2	99	1	353	0	99	99	1	N0	0	MD						0	1
0	1	99	42	2	51.3	159	20.39	99	99	11	3	13	1	11	99	99	336	0	99	1	0	N0	0	WD						0	0
0	1	99	46	1	60	161	23.18	99	99	11	11	18	1	11	99	99	275	500	99	99	3	N2a	6	MD						0	4
0	1	1	64	1	65	170	22.49	99	1	2	3	16	1	11	99	99	376	300	99	1	1	N0	0	WD						0	2
0	1	1	51	1	76.3	185	22.29	99	99	11	2	11	1	2	99	99	356	100	99	1	4	N0	0	MD	C	1	3	1	2011-09-19	1	3
0	1	99	62	1	67	175	21.88	99	1	2	2	7	1	3	99	99	186	300	99	99	3	N2b	6	MD						0	3
0	1	99	70	2	48	161	18.52	99	1	2	2	11	1	3	99	99	305	310	99	99	0	N0	0	WD						0	0
0	1	1	72	1	70	157	28.25	99	99	2	2	9	1	2	99	99	179	0	99	99	3	N1a	1	MD						0	1
0	1	99	50	2	44	148	20.09	99	1	2	2	28	1	11	99	99	264	100	99	99	1	N0	0	MD						0	2
0	1	1	56	1	51.5	162	19.62	99	99	11	2	14	1	11	99	99	188	200	99	99	2	N0	0	MD						0	3
0	1	1	70	1	57	169	19.96	99	99	11	2	18	1	3	99	99	208	50	99	99	2	N0	0	MD	C	1	4	1	2011-08-02	1	3
0	1	1	53	1	72.5	171	24.74	99	99	11	2	21	1	11	99	99	231	100	99	99	3	N1b	2	MD						0	3
0	1	99	75	2	47	150	20.89	1	99	3	11	23	1	11	99	99	295	0	99	99	3	N1a	1	MD	C	1	7	1	2011-09-15	1	2
0	1	1	60	1	71.7	171	24.64	99	99	11	11	13	1	11	99	99	295	300	99	99	3	N2a	5	WD						0	3
0	1	99	63	1	69	165	25.47	99	99	2	11	6	1	2	99	99	266	50	99	99	3	N2b	11	MD						0	4
0	1	99	53	1	87	179	27.15	99	99	11	2	5	1	3	99	99	392	350	99	1	2	N0	0	MD						0	3
0	1	99	79	1	63	169	22.11	99	1	11	2	7	1	2	99	99	305	150	99	1	4	N1b	2	mucinous						0	3
0	1	99	70	1	49	172	16.56	99	1	11	2	19	1	11	99	99	518	800	99	99	4	N2b	16	MD						0	3
0	1	1	69	1	54.9	155	22.76	99	99	11	3	16	1	2	1	99	407	0	99	1	1	N0	0	MD	C	2	11	1	2011-12-30	2	2
0	1	99	71	1	62	164	23.05	1	99	2	3	16	1	11	99	99	389	200	99	1	3	N1a	1	WD						0	1
0	1	99	52	2	47	151	20.61	99	99	11	3	19	1	11	99	99	443	900	99	1	4	N1b	2	MD						0	2
0	1	99	63	1	75.6	168	26.95	99	99	2	2	6	1	2	99	1	285	0	99	99	1	N0	0	MD						0	1
0	1	99	70	2	61	154	25.59	99	1	2	11	6	1	2	99	99	191	0	99	99	2	N0	0	MD						0	3
0	1	99	51	1	81.9	177	26.11	99	99	11	11	6	1	2	99	99	238	0	99	99	2	N0	0	MD						0	3
0	1	99	69	2	52.7	151	23.05	99	1	11	3	30	1	11	99	99	401	530	99	1	3	N1a	1	MD						0	2
0	1	99	51	2	52	158	20.83	99	1	11	11	6	1	2	99	99	190	0	99	99	3	N1b	2	MD						0	3
0	1	99	77	2	40	153	17.09	99	99	11	2	5	1	2	99	99	163	0	99	99	3	N1b	2	MD						0	4
0	1	1	71	2	69.4	159	27.45	1	1	11	11	7	1	2	99	99	253	50	99	1	3	N2b	8	MD						0	3
0	1	99	49	2	56	154	23.61	99	99	2	11	6	1	2	99	99	163	0	99	99	3	N2a	4	MD						0	4
0	1	1	48	1	73.6	171	25.29	99	99	11	11	11	1	2	99	99	299	230	99	1	3	N1b	2	MD	C	1	5	1	2012-03-07	0	3
0	1	99	60	1	68.6	173	22.92	99	99	11	2	10	1	11	99	99	240	100	99	99	1	N0	0	MD						0	2
0	1	99	45	1	58	167	20.8	99	99	2	2	10	1	3	1	99	480	150	99	1	1	N0	0	MD	C	1	6	1	2012-02-29	2	2
0	1	99	53	2	62.5	161	24.11	99	1	11	2	9	1	2	99	99	298	150	99	99	3	N1a	2	MD	C	3	17	1	2011-12-16	2	3
0	1	1	52	1	77.4	171	26.56	99	99	2	11	12	1	2	99	99	326	100	99	99	3	N1b	3	MD						0	3
0	1	99	65	2	62	155	25.91	99	99	11	2	15	1	11	99	99	298	500	99	99	1	N0	0	MD						0	2
0	1	1	48	1	53.6	171	18.33	99	99	11	2	9	1	2	99	99	279	500	99	1	4	N0	0	PD	C	1	2	1	2012-03-30	1	3
0	1	99	36	1	67	164	24.91	99	99	11	11	6	1	2	99	99	239	150	99	99	3	N2a	6	MD						0	3
0	1	99	70	1	66	170	22.89	1	99	2	2	7	1	2	99	99	201	50	99	99	2	N0	0	MD						0	3
0	1	99	50	2	43.7	151	19.17	99	99	2	11	8	1	2	99	99	352	500	99	1	4	N1b	2	mucinous						0	4
0	1	1	60	1	59.7	169	20.8	99	99	2	2	6	1	2	99	99	329	0	99	1	1	N0	0	MD						0	2
0	1	99	55	1	64	167	22.95	99	1	11	2	6	1	2	99	99	210	50	99	99	3	N1a	1	MD						0	3
0	1	99	75	1	60	172	20.28	99	99	11	3	23	1	11	99	99	260	850	99	99	2	N0	0	MD						0	3
0	1	1	40	1	64.8	166	23.52	99	99	11	11	6	1	2	99	99	226	50	99	99	3	N2b	7	MD						0	4
0	1	1	61	1	65	168	23.06	99	99	11	2	6	1	2	99	99	230	0	99	99	2	N0	0	MD						0	3
0	1	99	47	1	60.3	173	20.05	99	99	11	2	17	1	11	99	99	243	280	99	99	1	N0	0	MD						0	2
0	1	1	87	1	70.7	173	23.68	99	99	11	2	6	1	2	99	99	256	200	99	99	2	N0	0	MD						0	3
0	1	99	63	1	64	171	21.86	99	99	11	11	7	1	2	99	99	180	0	99	99	3	N1b	2	MD						0	3
0	1	1	54	1	78.6	168	28.02	99	1	2	2	6	1	2	99	99	268	150	99	99	1	N0	0	MD						0	2
0	1	99	44	2	50	158	20.03	99	99	2	2	6	1	2	99	99	250	50	99	1	3	N1a	0	MD						0	2
0	1	1	34	1	93	177	29.62	99	99	2	2	7	1	3	99	99	221	0	99	99	1	N0	0	MD						0	1
0	1	99	56	2	47.7	149	21.54	99	99	11	11	6	1	2	99	1	215	100	99	99	3	N2b	10	MD						0	3
0	1	99	62	2	74	158	29.46	99	99	2	2	16	1	11	99	99	212	250	99	99	1	N0	0	MD						0	2
0	1	99	45	2	51	164	18.87	99	99	11	11	11	1	11	99	1	214	230	99	99	3	N1b	2	MD						0	3
0	1	1	69	1	64.7	167	23.2	99	99	3	11	10	1	11	99	99	230	130	99	99	3	N1b	2	MD						0	3
0	1	99	64	2	53	160	20.81	99	99	11	2	7	1	2	99	99	222	0	99	99	3	N2b	8	mucinous						0	3
0	1	1	73	1	77	163	28.98	1	1	2	11	44	1	11	99	99	314	950	99	99	1	N0	0	MD	C	2	11	1	2012-03-31	0	1
0	1	1	70	1	73.4	169	25.7	1	99	2	11	5	1	2	99	99	225	50	99	99	2	N0	0	MD						0	3
0	1	99	66	1	67	174	22.13	99	99	2	2	8	1	3	99	99	328	100	99	1	2	N0	0	MD						0	3
0	1	99	48	2	63.6	158	25.41	99	1	2	2	8	1	2	99	99	329	100	99	1	3	N2a	0	MD						0	3
0	1	99	76	2	48.8	142	24.03	99	99	3	3	8	1	2	99	99	245	0	99	99	1	N0	0	MD						0	2
0	1	99	64	2	49.3	158	19.72	1	99	11	3	9	1	2	99	99	212	300	99	99	1	N0	0	MD						0	1
0	1	1	53	1	65.6	163	24.57	99	99	11	2	7	1	3	99	99	324	100	99	1	3	N1a	1	MD						0	3
0	1	99	55	2	54.6	157	22.04	99	99	2	2	6	1	2	99	1	258	500	99	99	1	N0	0	MD						0	1
0	1	99	66	1	65	162	24.71	99	99	2	2	6	1	3	99	99	325	500	99	99	1	N0	0	MD						0	2
0	1	99	63	2	62.6	152	27.17	99	99	2	3	18	1	2	99	1	261	0	99	99	1	N0	0	MD	A	2	11	1	2012-06-04	2	2
0	1	1	63	1	47	164	17.47	1	99	2	11	15	1	11	99	99	378	1010	99	99	2	N0	0	MD						0	3
0	1	99	56	2	57	151	25.1	99	99	2	3	9	1	2	99	1	253	0	99	99	1	N0	0	MD						0	2
0	1	99	47	1	65	168	23.03	99	99	2	11	5	1	2	99	99	217	0	99	1	3	N1b	2	MD						0	3
0	1	99	62	1	50	165	18.41	1	99	3	2	15	1	11	99	99	316	500	99	1	2	N0	0	WD						0	3
0	1	99	31	1	54.5	159	21.56	99	99	11	11	6	1	2	99	99	351	100	99	99	4	N2b	25	MD						0	4
0	1	99	72	2	55	150	24.44	99	1	2	3	6	1	2	99	99	275	0	99	1	1	N0	0	WD						0	2
0	1	99	54	2	60	162	22.86	99	1	2	11	9	1	2	99	99	389	300	99	99	3	N1a	1	MD						0	1
0	1	99	63	2	56	146	26.34	1	1	3	2	11	1	2	99	99	387	200	99	99	1	N0	0	MD						0	1
0	1	1	40	1	58.7	174	19.34	99	99	2	3	7	1	2	99	99	241	200	99	99	1	N0	0	MD						0	1
0	1	99	77	2	34.4	137	18.3	99	99	3	3	7	1	2	99	1	283	50	99	1	2	N0	0	MD						0	3
0	1	99	55	2	64	157	26.1	99	99	11	2	6	1	3	99	99	326	0	99	99	3	N1b	2	MD						0	1
0	1	99	51	2	47.7	152	20.54	99	1	2	11	9	1	2	99	99	272	200	99	99	3	N1b	3	MD						0	1
0	1	99	59	2	55	152	23.68	99	1	11	3	6	1	3	1	99	539	300	99	1	2	N0	0	MD						0	3
0	1	99	70	1	64	168	22.78	1	99	3	11	5	1	2	99	99	152	100	99	99	4	N1b	2	MD						0	3
[truncated: 36 more rows]
